# Supplementary material
Source: publisher figshare collection journal article supplement (https://acs.figshare.com/ndownloader/files/4615039)

*Supporting Information for*

**Direct Access to Anthranilic Acid Derivatives via CO<sub>2</sub> Incorporation Reaction Using Arynes**

*Hiroto Yoshida,\* Takami Morishita and Joji Ohshita*

Department of Applied Chemistry, Graduate School of Engineering, Hiroshima University,  
Higashi-Hiroshima 739-8527, Japan

**Contents**

|                                                                      |            |
|----------------------------------------------------------------------|------------|
| <b>General Remarks</b>                                               | <b>S2</b>  |
| <b>Aryne Precursors</b>                                              | <b>S2</b>  |
| <b>Experimental Procedures and Characterization Data of Products</b> | <b>S3</b>  |
| <b>References</b>                                                    | <b>S11</b> |
| <b><sup>1</sup>H and <sup>13</sup>C NMR Spectra of Products</b>      | <b>S12</b> |

**General remarks.**

All manipulations of oxygen- and moisture-sensitive materials were conducted with a standard Schlenk technique under a purified argon atmosphere. Nuclear magnetic resonance spectra were taken on a JEOL EX-270 ( $^1\text{H}$ , 270 MHz;  $^{13}\text{C}$ , 67.8 MHz) spectrometer or a JEOL Lambda-400 ( $^1\text{H}$ , 400 MHz;  $^{13}\text{C}$ , 99.5 MHz) spectrometer using residual chloroform ( $^1\text{H}$ ,  $\delta$  = 7.26) or  $\text{CDCl}_3$  ( $^{13}\text{C}$ ,  $\delta$  = 77.0) as an internal standard.  $^1\text{H}$  NMR data are reported as follows: chemical shift, multiplicity (s = singlet, d = doublet, t = triplet, q = quartet, quint = quintet, sept = septet, br = broad, m = multiplet), coupling constants (Hz), integration. High-resolution mass spectra were obtained with a JEOL JMS-SX102A spectrometer. Melting points were measured with Yanaco Micro Melting Point apparatus and uncorrected. Column chromatography was carried out using Merck Kieselgel 60. Unless otherwise noted, commercially available reagents were used without purification. 18-Crown-6 was recrystallized from distilled MeCN. KF (spray-dried) was vacuum dried at 100 °C for 12 h. THF was distilled from sodium/benzophenone ketyl. MeCN was distilled from phosphorus pentoxide.

**Aryne precursors.**

2-(Trimethylsilyl)phenyl triflate (**1a**),<sup>1</sup> 3-(trimethylsilyl)-5,6,7,8-tetrahydro-2-naphthyl triflate (**1b**),<sup>2</sup> 6-(trimethylsilyl)-5-indanyl triflate (**1c**),<sup>3</sup> 4,5-dimethyl-2-(trimethylsilyl)phenyl triflate (**1d**),<sup>3</sup> 3-(trimethylsilyl)-2-naphthyl triflate (**1e**),<sup>2</sup> 3,6-dimethyl-2-(trimethylsilyl)phenyl triflate (**1f**),<sup>2</sup> 4-fluoro-2-(trimethylsilyl)phenyl triflate (**1g**),<sup>2</sup> 4-methoxy-2-(trimethylsilyl)phenyl triflate (**1h**)<sup>4</sup> and 4-methyl-2-(trimethylsilyl)phenyl triflate (**1i**)<sup>5</sup> were prepared according to literature procedures.

### Three-component coupling of arynes, amines and CO<sub>2</sub>: a general procedure.

A THF solution (1 mL) of an amine (0.165 mmol), 18-Crown-6 (0.079 g, 0.30 mmol) and KF (0.017 g, 0.30 mmol) was degassed through two freeze-thaw cycles, and the reaction flask was filled with CO<sub>2</sub> by connecting to a balloon (1 L). To this solution was added an aryne precursor (0.15 mmol), and the resulting mixture was stirred at 0 °C for the period as specified in Table 1 and Scheme 1. The mixture was diluted with ethyl acetate, filtered through a Celite plug, and concentrated. Silica-gel column chromatography (ethyl acetate as an eluent) gave the corresponding product.

In cases that an anthranilic acid was difficult to be isolated (Table 1, entries 3–5, 7, 9, 10, 12 or 13), a crude product was treated with 2 M solution of (trimethylsilyl)diazomethane in hexane (0.083 mL, 0.165 mmol), methanol (0.15 mL) and dichloromethane (3 mL) at room temperature for 12 h before the resulting mixture was quenched with acetic acid.<sup>6</sup> Evaporation of the solvent followed by silica-gel column chromatography (ethyl acetate as an eluent) gave the respective methyl ester.

#### *N,N*-Di-*n*-propylanthranilic acid (3aa)

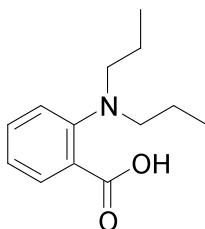

Isolated in 84% yield as a white solid: mp 107–115 °C; <sup>1</sup>H NMR (CDCl<sub>3</sub>) δ 0.85 (d, *J* = 7.4 Hz, 6 H), 1.15–1.66 (m, 4 H), 3.00 (brs, 4 H), 7.34–7.43 (m, 2 H), 7.59 (td, *J* = 7.7, 1.7 Hz, 1 H), 7.36 (dd, *J* = 7.6, 1.6 Hz, 1 H); <sup>13</sup>C NMR (CDCl<sub>3</sub>) δ 11.4, 19.8, 58.9, 122.2, 127.4, 127.6, 131.7, 133.7, 148.3, 167.8; HRMS Calcd for C<sub>13</sub>H<sub>19</sub>NO<sub>2</sub>: M<sup>+</sup>, 221.1416. Found: *m/z* 221.1412.

#### *N,N*-Di-*n*-butylanthranilic acid (3ab)

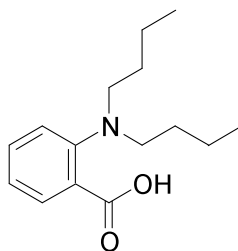

Isolated in 74% yield as a pale yellow solid: mp 54–58 °C; <sup>1</sup>H NMR (CDCl<sub>3</sub>) δ 0.82 (d, *J* = 7.1 Hz, 6 H), 1.23 (brs, 6 H), 1.55 (brs, 2 H), 2.82–3.30 (m, 4 H), 7.30–7.48 (m, 2 H),

7.60 (td,  $J = 7.7, 1.7$  Hz, 1 H), 8.31 (dd,  $J = 7.8, 1.6$  Hz, 1 H);  $^{13}\text{C}$  NMR ( $\text{CDCl}_3$ )  $\delta$  13.7, 20.3, 28.4, 57.1, 122.1, 127.4, 127.7, 131.7, 133.7, 148.0, 167.9; HRMS Calcd for  $\text{C}_{15}\text{H}_{23}\text{NO}_2$ :  $\text{M}^+$ , 249.1728. Found:  $m/z$  249.1719.

***N,N*-Diethylantranilic acid methyl ester (3ac)**

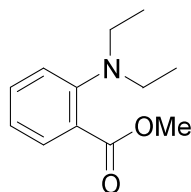

Isolated in 54% yield as a pale yellow oil:  $^1\text{H}$  NMR ( $\text{CDCl}_3$ )  $\delta$  1.05 (t,  $J = 7.1$  Hz, 3 H), 3.14 (q,  $J = 7.1$  Hz, 4 H), 3.87 (s, 3 H), 6.92 (td,  $J = 7.5, 1.0$  Hz, 1 H), 7.05 (d,  $J = 8.2$  Hz, 1 H), 7.34 (ddd,  $J = 8.4, 7.2, 1.7$  Hz, 1 H), 7.56 (dd,  $J = 7.5, 1.7$  Hz, 1 H);  $^{13}\text{C}$  NMR ( $\text{CDCl}_3$ )  $\delta$  12.3, 46.9, 51.97, 51.99, 120.5, 120.9, 126.1, 130.5, 131.5, 150.3, 169.3; HRMS Calcd for  $\text{C}_{12}\text{H}_{17}\text{NO}_2$ :  $\text{M}^+$ , 207.1253. Found:  $m/z$  207.1252.

***N,N*-Bis(2-methoxyethyl)anthranilic acid methyl ester (3ad)**

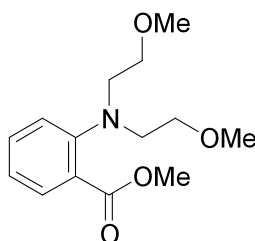

Isolated in 64% yield as a pale yellow oil:  $^1\text{H}$  NMR ( $\text{CDCl}_3$ )  $\delta$  3.28 (s, 3 H), 3.63 (t,  $J = 6.0$  Hz, 4 H), 3.46 (t,  $J = 6.0$  Hz, 4 H), 3.87 (s, 3 H), 6.97 (td,  $J = 7.4, 0.7$  Hz, 1 H), 7.18 (d,  $J = 7.6$  Hz, 1 H), 7.36 (td,  $J = 7.8, 1.8$  Hz, 1 H), 7.58 (dd,  $J = 7.6, 1.8$  Hz, 1 H);  $^{13}\text{C}$  NMR ( $\text{CDCl}_3$ )  $\delta$  52.02, 52.03, 53.5, 58.7, 70.7, 121.4, 122.4, 126.2, 130.63, 130.68, 131.8, 150.3, 168.8; HRMS Calcd for  $\text{C}_{14}\text{H}_{21}\text{NO}_4$ :  $\text{M}^+$ , 267.1471. Found:  $m/z$  267.1462.

***N,N*-Diisopropylantranilic acid methyl ester (3ae)**

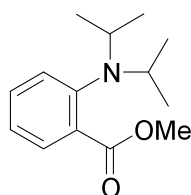

Isolated in 79% yield as a pale yellow oil:  $^1\text{H}$  NMR ( $\text{CDCl}_3$ )  $\delta$  0.98 (d,  $J = 6.5$  Hz, 12 H), 3.48 (sept,  $J = 6.5$  Hz, 2 H), 3.84 (s, 3 H), 7.17 (td,  $J = 7.3, 1.2$  Hz, 1 H), 7.27 (dd,  $J = 8.2, 1.0$  Hz, 1 H), 7.36 (ddd,  $J = 8.0, 7.2, 1.7$  Hz, 1 H), 7.45 (dd,  $J = 7.5, 1.7$  Hz, 1 H);  $^{13}\text{C}$

NMR (CDCl<sub>3</sub>)  $\delta$  21.4, 29.7, 49.7, 51.7, 124.8, 128.2, 129.9, 130.0, 146.6, 170.0; HRMS Calcd for C<sub>14</sub>H<sub>21</sub>NO<sub>2</sub>: M<sup>+</sup>, 235.1572. Found:  $m/z$  235.1580.

***N,N*-Dicyclohexylanthranilic acid (3af)**

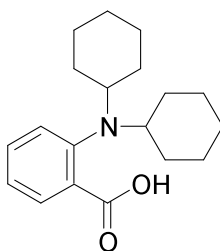

Isolated in 68% yield as a white solid: mp 155–157 °C; <sup>1</sup>H NMR (CDCl<sub>3</sub>)  $\delta$  0.92–1.38 (m, 10 H), 1.60 (d,  $J$  = 12.8 Hz, 2 H), 1.67–1.85 (m, 6 H), 2.13 (d,  $J$  = 12.2 Hz, 2 H), 3.28–3.42 (m, 2 H), 7.25–7.32 (m, 1 H), 2.13 (td,  $J$  = 7.2, 1.3 Hz, 1 H), 7.52 (td,  $J$  = 7.9, 1.6 Hz, 1 H), 8.35 (dd,  $J$  = 7.9, 1.6 Hz, 1 H); <sup>13</sup>C NMR (CDCl<sub>3</sub>)  $\delta$  25.30, 25.38, 25.39, 28.1, 30.2, 58.4, 125.1, 127.8, 129.8, 131.6, 132.2, 143.0, 168.5; HRMS Calcd for C<sub>19</sub>H<sub>27</sub>NO<sub>2</sub>: M<sup>+</sup>, 301.2042. Found:  $m/z$  301.2040.

***N*-Cyclohexyl-*N*-methylantranilic acid methyl ester (3ag)**

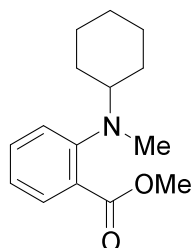

Isolated in 72% yield as a pale yellow oil: <sup>1</sup>H NMR (CDCl<sub>3</sub>)  $\delta$  1.10 (tt,  $J$  = 12.7, 3.1 Hz, 1 H), 1.15–1.32 (m, 2 H), 1.38–1.54 (m, 2 H), 1.55–1.71 (m, 1 H), 1.72–1.87 (m, 4 H), 2.72 (s, 3 H), 3.07 (tt,  $J$  = 11.6, 3.1 Hz, 1 H), 3.88 (s, 3 H), 6.84 (td,  $J$  = 7.5, 1.0 Hz, 1 H), 6.97 (d,  $J$  = 8.2 Hz, 1 H), 7.32 (ddd,  $J$  = 8.7, 7.2, 1.7 Hz, 1 H), 7.58 (dd,  $J$  = 7.7, 1.9 Hz, 1 H); <sup>13</sup>C NMR (CDCl<sub>3</sub>)  $\delta$  25.9, 26.1, 29.5, 33.5, 51.96, 51.99, 64.1, 118.83, 118.86, 122.7, 131.1, 131.7, 151.8, 169.6; HRMS Calcd for C<sub>15</sub>H<sub>21</sub>NO<sub>2</sub>: M<sup>+</sup>, 247.1572. Found:  $m/z$  247.1567.

***N*-(Cyclopropylmethyl)-*N*-propylantranilic acid (3ah)**

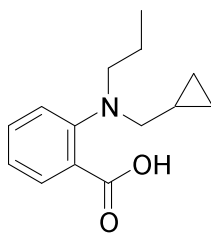

Isolated in 77% yield as a white solid: mp 107–111 °C;  $^1\text{H}$  NMR ( $\text{CDCl}_3$ ; 50 °C)  $\delta$  -0.06–0.18 (m, 2 H), 0.39–0.55 (m, 2 H), 0.75–0.95 (m, 4 H), 1.31–1.75 (m, 2 H), 2.78–3.20 (m, 4 H), 7.34–7.44 (m, 2 H), 7.60 (td,  $J$  = 8.0, 1.7 Hz, 1 H), 8.31 (dd,  $J$  = 7.6, 1.4 Hz, 1 H);  $^{13}\text{C}$  NMR ( $\text{CDCl}_3$ )  $\delta$  4.2, 8.0, 11.5, 19.8, 58.0, 62.4, 122.5, 127.5, 131.7, 133.5, 148.6, 167.9; HRMS Calcd for  $\text{C}_{14}\text{H}_{19}\text{NO}_2$ :  $\text{M}^+$ , 233.1416. Found:  $m/z$  233.1413.

### 2-(Azepan-1-yl)benzoic acid methyl ester (3ai)

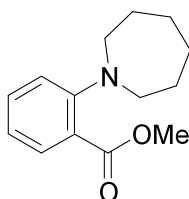

Isolated in 62% yield as a pale yellow oil:  $^1\text{H}$  NMR ( $\text{CDCl}_3$ )  $\delta$  1.53–1.65 (m, 4 H), 1.71–1.83 (m, 4 H), 3.32 (t,  $J$  = 5.6 Hz, 4 H), 3.87 (s, 3 H), 6.74 (td,  $J$  = 1.0, 7.4 Hz, 1 H), 6.95 (dd,  $J$  = 8.4, 0.7 Hz, 1 H), 7.29 (td,  $J$  = 7.7, 1.7 Hz, 1 H), 7.52 (dd,  $J$  = 7.7, 1.7 Hz, 1 H);  $^{13}\text{C}$  NMR ( $\text{CDCl}_3$ )  $\delta$  28.1, 28.4, 30.0, 52.0, 52.7, 116.8, 116.9, 119.6, 131.1, 131.6, 151.2, 170.0; HRMS Calcd for  $\text{C}_{14}\text{H}_{19}\text{NO}_2$ :  $\text{M}^+$ , 233.1416. Found:  $m/z$  233.1414.

### 2-(Piperidin-1-yl)benzoic acid methyl ester (3aj)

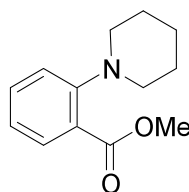

Isolated in 54% yield as a yellow oil:  $^1\text{H}$  NMR ( $\text{CDCl}_3$ )  $\delta$  1.52–1.62 (m, 2 H), 1.67–1.78 (m, 4 H), 2.99 (d,  $J$  = 5.3 Hz, 4 H), 6.93 (td,  $J$  = 7.5, 1.0 Hz, 1 H), 7.01 (dd,  $J$  = 8.2, 1.0 Hz, 1 H), 7.37 (ddd,  $J$  = 8.2, 7.2, 1.7 Hz, 1 H), 7.68 (dd,  $J$  = 7.7, 1.7 Hz, 1 H);  $^{13}\text{C}$  NMR ( $\text{CDCl}_3$ )  $\delta$  24.2, 26.2, 52.0, 53.8, 118.6, 120.6, 123.9, 131.4, 132.4, 153.2, 168.9; HRMS Calcd for  $\text{C}_{12}\text{H}_{15}\text{NO}_2$ :  $\text{M}^+$ , 205.1103. Found:  $m/z$  205.1108.

### 2-(3,4-Dihydro-(1H)-isoquinolin-2-yl)benzoic acid (3ak)

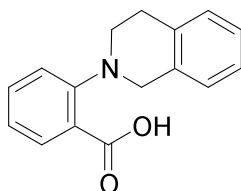

Isolated in 38% yield as a white solid: mp 176–179 °C;  $^1\text{H}$  NMR ( $\text{CDCl}_3$ )  $\delta$  2.90–3.60 (m, 4 H), 4.24 (brs, 2 H), 7.03–7.13 (m, 1 H), 7.18–7.35 (m, 3 H), 7.43–7.58 (m, 2 H), 7.64 (ddd,  $J = 8.2, 7.5, 1.7$  Hz, 1 H), 8.34 (dd,  $J = 7.7, 1.7$  Hz, 1 H);  $^{13}\text{C}$  NMR ( $\text{CDCl}_3$ )  $\delta$  29.0, 51.5, 55.8, 122.5, 125.2, 126.4, 126.5, 127.3, 127.7, 129.0, 132.0, 132.3, 132.4, 134.0, 150.7, 167.0; HRMS Calcd for  $\text{C}_{16}\text{H}_{15}\text{NO}_2$ :  $\text{M}^+$ , 253.1103. Found:  $m/z$  253.1103.

### 2-(Pyrrolidin-1-yl)benzoic acid methyl ester (3al)

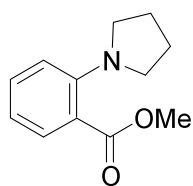

Isolated in 7% yield as a pale brown oil:  $^1\text{H}$  NMR ( $\text{CDCl}_3$ )  $\delta$  1.89–1.99 (m, 4 H), 3.18–3.30 (m, 4 H), 3.88 (s, 3 H), 6.71 (td,  $J = 7.4, 1.0$  Hz, 1 H), 6.78 (d,  $J = 8.5$  Hz, 1 H), 7.29 (ddd,  $J = 8.7, 7.0, 1.7$  Hz, 1 H), 7.57 (dd,  $J = 7.7, 1.7$  Hz, 1 H);  $^{13}\text{C}$  NMR ( $\text{CDCl}_3$ )  $\delta$  25.9, 50.8, 52.0, 113.9, 115.6, 117.1, 131.1, 131.8, 148.0, 169.6; HRMS Calcd for  $\text{C}_{13}\text{H}_{17}\text{NO}_2$ :  $\text{M}^+$ , 219.1259. Found:  $m/z$  219.1261.

### *N*-[(1,3-Dioxolan-2-yl)methyl]-*N*-methylantranilic acid methyl ester (3am)

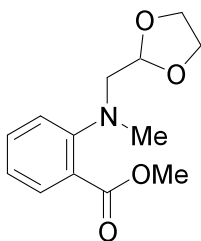

Isolated in 29% yield as a colorless oil:  $^1\text{H}$  NMR ( $\text{CDCl}_3$ )  $\delta$  2.96 (s, 3 H), 3.30 (d,  $J = 4.1$  Hz, 2 H), 3.82–3.88 (m, 2 H), 3.89 (s, 3 H), 3.93–3.98 (m, 2 H), 5.09 (t,  $J = 4.1$  Hz, 1 H), 6.88 (t,  $J = 7.5$  Hz, 1 H), 7.06 (d,  $J = 8.2$  Hz, 1 H), 7.35 (td,  $J = 7.8, 1.7$  Hz, 1 H), 7.62 (dd,  $J = 7.7, 1.7$  Hz, 1 H);  $^{13}\text{C}$  NMR ( $\text{CDCl}_3$ )  $\delta$  29.7, 41.2, 52.1, 59.2, 64.8, 103.7, 118.7, 119.6, 122.1, 131.3, 132.1, 151.8, 168.9; HRMS Calcd for  $\text{C}_{13}\text{H}_{17}\text{NO}_4$ :  $\text{M}^+$ , 251.1158. Found:  $m/z$  251.1155.

### *N*-(Cyclopropylmethyl)-*N*-propyl-4,5-tetramethyleneanthranilic acid (3bh)

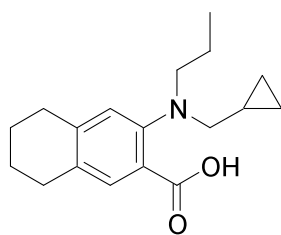

Isolated in 90% yield as a white solid: mp 142–147 °C;  $^1\text{H}$  NMR ( $\text{CDCl}_3$ )  $\delta$  -0.02–0.09 (m, 1 H), 0.16–0.27 (m, 1 H), 0.36–0.60 (m, 2 H), 0.73–0.92 (m, 4 H), 1.18–1.41 (m, 1 H), 1.48–1.68 (m, 1 H), 1.72–1.85 (m, 4 H), 2.72–2.97 (m, 7 H), 3.08–3.21 (m, 1 H), 7.01 (s, 1 H), 7.97 (s, 1 H);  $^{13}\text{C}$  NMR ( $\text{CDCl}_3$ )  $\delta$  3.9, 4.6, 8.1, 11.5, 19.8, 22.5, 22.7, 28.8, 29.6, 58.1, 62.5, 122.5, 124.3, 132.1, 136.8, 143.5, 145.4, 168.5; HRMS Calcd for  $\text{C}_{18}\text{H}_{25}\text{NO}_2$ :  $\text{M}^+$ , 287.1885. Found:  $m/z$  287.1881.

***N*-(Cyclopropylmethyl)-*N*-propyl-4,5-trimethyleneanthranilic acid (3ch)**

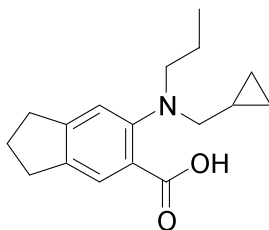

Isolated in 55% yield as a white solid: mp 119–123 °C;  $^1\text{H}$  NMR ( $\text{CDCl}_3$ )  $\delta$  -0.02–0.11 (m, 1 H), 0.15–0.27 (m, 1 H), 0.37–0.62 (m, 2 H), 0.72–1.01 (m, 4 H), 1.19–1.42 (m, 1 H), 1.50–1.70 (m, 1 H), 2.11 (quint,  $J = 7.5$  Hz, 2 H), 2.75–2.14 (m, 7 H), 3.15 (td,  $J = 5.1$ , 11.6 Hz, 1 H), 7.19 (s, 1 H), 8.31 (s, 1 H);  $^{13}\text{C}$  NMR ( $\text{CDCl}_3$ )  $\delta$  3.9, 4.6, 8.0, 11.5, 19.7, 25.4, 32.2, 33.1, 58.1, 62.5, 117.9, 125.3, 127.0, 143.9, 146.8, 150.6, 168.5; HRMS Calcd for  $\text{C}_{17}\text{H}_{23}\text{NO}_2$ :  $\text{M}^+$ , 273.1729. Found:  $m/z$  273.1735.

***N*-(Cyclopropylmethyl)-*N*-propyl-4,5-dimethylantranilic acid (3dh)**

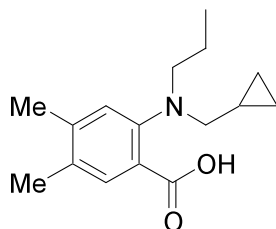

Isolated in 75% yield as a pale yellow solid: mp 117–121 °C;  $^1\text{H}$  NMR ( $\text{CDCl}_3$ )  $\delta$  -0.06–0.07 (m, 1 H), 0.14–0.25 (m, 1 H), 0.33–0.60 (m, 2 H), 0.73–0.92 (m, 4 H), 1.18–1.39 (m, 1 H), 1.48–1.68 (m, 1 H), 2.28 (s, 3 H), 2.30 (s, 3 H), 2.79–2.98 (m, 3 H), 3.08–3.21 (m, 1 H), 7.09 (s, 1 H), 8.04 (s, 1 H);  $^{13}\text{C}$  NMR ( $\text{CDCl}_3$ )  $\delta$  3.9, 4.5, 8.1, 11.5, 19.3, 19.8, 20.2,



58.1, 62.4, 123.1, 124.7, 132.3, 136.3, 143.1, 145.9, 168.5; HRMS Calcd for C<sub>16</sub>H<sub>23</sub>NO<sub>2</sub>: M<sup>+</sup>, 261.1729. Found: *m/z* 261.1728.

**3-[*N*-(Cyclopropylmethyl)-*N*-propylamino]-2-naphthoic acid (3eh)**

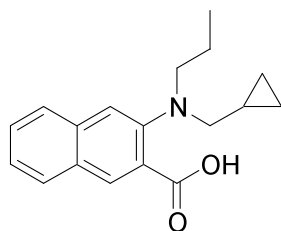

Isolated in 42% yield as a yellow solid: mp 142–146 °C; <sup>1</sup>H NMR (CDCl<sub>3</sub>) δ -0.04–0.10 (m, 1 H), 0.15–0.30 (m, 1 H), 0.34–0.62 (m, 2 H), 0.76–0.99 (m, 4 H), 1.25–1.43 (m, 1 H), 1.55–1.78 (m, 1 H), 2.92–3.20 (m, 3 H), 3.20–3.39 (m, 1 H), 7.56 (ddd, *J* = 8.2, 7.0, 1.4 Hz, 1 H), 7.61 (ddd, *J* = 8.0, 6.8, 1.2 Hz, 1 H), 7.80 (s, 1 H), 7.83 (d, *J* = 7.7 Hz, 1 H), 7.99 (d, *J* = 8.0 Hz, 1 H), 8.91 (s, 1 H); <sup>13</sup>C NMR (CDCl<sub>3</sub>) δ 4.1, 4.6, 8.1, 11.5, 19.8, 58.7, 63.0, 121.57, 121.59, 124.8, 127.1, 128.7, 129.5, 131.6, 133.4, 135.3, 145.0, 168.2; HRMS Calcd for C<sub>18</sub>H<sub>21</sub>NO<sub>2</sub>: M<sup>+</sup>, 283.1572. Found: *m/z* 283.1572.

***N*-(Cyclopropylmethyl)-*N*-propyl-3,6-dimethylantranilic acid (3fh)**

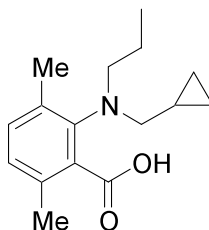

Isolated in 71% yield as a yellow oil: <sup>1</sup>H NMR (CDCl<sub>3</sub>) δ 0.02–0.07 (m, 1 H), 0.21–0.27 (m, 1 H), 0.40–0.47 (m, 1 H), 0.53–0.61 (m, 1 H), 0.83–0.96 (m, 4 H), 1.32–1.46 (m, 1 H), 1.59–1.75 (m, 1 H), 2.38 (s, 3 H), 2.71 (s, 3 H), 3.06 (dd, *J* = 7.0, 2.8 Hz, 2 H), 3.11 (td, *J* = 12.1, 5.1 Hz, 1 H), 3.27 (td, *J* = 12.1, 5.1 Hz, 1 H), 7.13 (s, 2 H); <sup>13</sup>C NMR (CDCl<sub>3</sub>) δ 3.8, 4.7, 8.5, 11.5, 19.7, 20.6, 24.4, 55.9, 59.6, 127.6, 132.08, 132.14, 134.8, 141.9, 145.0, 168.6; HRMS Calcd for C<sub>16</sub>H<sub>23</sub>NO<sub>2</sub>: M<sup>+</sup>, 261.1729. Found: *m/z* 261.1727.

**A mixture of *N*-(cyclopropylmethyl)-*N*-propyl-5-fluoroanthranilic acid (3gh) and *N*-(cyclopropylmethyl)-*N*-propyl-4-fluoroanthranilic acid (3'gh) (3gh:3'gh = 94:6)**

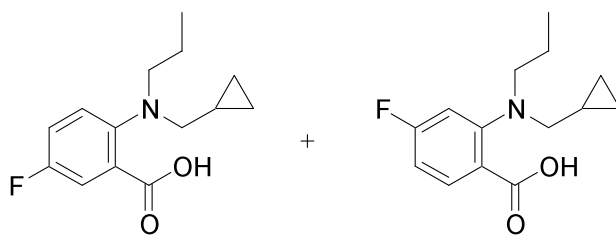

Isolated in 32% yield as a pale yellow solid: mp 106–109 °C;  $^1\text{H}$  NMR ( $\text{CDCl}_3$ )  $\delta$  -0.06–0.03 (m), 0.13–0.25 (m), 0.37–0.61 (m), 0.76–0.94 (m), 1.20–1.40 (m), 1.50–1.68 (m), 2.76–3.05 (m), 3.10–3.24 (m), 7.06–7.18 (m, *minor*), 7.23–7.32 (m), 7.37 (dd,  $J = 8.6, 4.6$  Hz), 7.99 (dd,  $J = 8.9, 3.1$  Hz, *major*), 8.33 (dd,  $J = 8.7, 6.5$  Hz, *minor*);  $^{13}\text{C}$  NMR ( $\text{CDCl}_3$ )  $\delta$  4.2, 4.4, 7.9 (*major*), 8.1 (*minor*), 11.44, 11.47, 19.8 (*major*), 20.0 (*minor*), 58.21 (*minor*), 58.29 (*major*), 62.6, 110.3 ( $J_{\text{C-F}} = 22.1$  Hz, *minor*), 115.1 ( $J_{\text{C-F}} = 21.3$  Hz, *minor*), 119.1 ( $J_{\text{C-F}} = 23.8$  Hz, *major*), 120.6 ( $J_{\text{C-F}} = 23.8$  Hz, *major*), 124.4 ( $J_{\text{C-F}} = 8.2$  Hz, *major*), 129.8 ( $J_{\text{C-F}} = 7.4$  Hz), 134.0 ( $J_{\text{C-F}} = 9.8$  Hz), 144.1 ( $J_{\text{C-F}} = 3.3$  Hz), 151.3, 161.0 ( $J_{\text{C-F}} = 249.4$  Hz), 166.61, 166.62; HRMS Calcd for  $\text{C}_{14}\text{H}_{18}\text{FNO}_2$ :  $\text{M}^+$ , 251.1322. Found:  $m/z$  251.1323.

**A mixture of *N*-(cyclopropylmethyl)-*N*-propyl-5-methoxyanthranilic acid (3hh) and *N*-(cyclopropylmethyl)-*N*-propyl-4-methoxyanthranilic acid (3'hh) (3hh:3'hh = 45:55)**

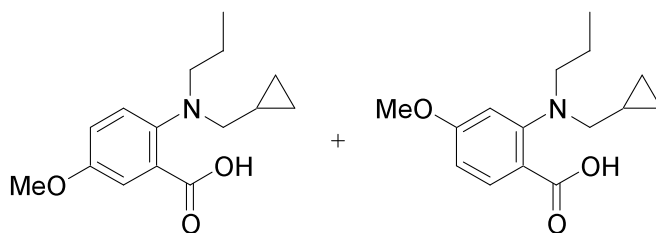

Isolated in 64% yield as a brown oil:  $^1\text{H}$  NMR ( $\text{CDCl}_3$ )  $\delta$  -0.05–0.08 (m), 0.13–0.23 (m), 0.34–0.59 (m), 0.76–0.93 (m), 1.17–1.40 (m), 1.50–1.65 (m), 2.77–3.00 (m), 3.03–3.21 (m), 3.85 (s), 3.86 (s), 6.84 (d,  $J = 2.4$  Hz, *major*), 6.90 (dd,  $J = 8.7, 2.4$  Hz, *major*), 7.10 (dd,  $J = 8.9, 3.0$  Hz, *minor*), 7.25 (d,  $J = 8.7$  Hz, *minor*), 7.79 (d,  $J = 8.7$  Hz, *minor*), 8.24 (d,  $J = 8.7$  Hz, *major*);  $^{13}\text{C}$  NMR ( $\text{CDCl}_3$ )  $\delta$  4.0, 4.4, 7.9, 8.1, 11.4, 11.5, 19.7, 19.9, 55.6, 55.7, 58.1, 58.2, 62.47, 62.49, 109.0, 112.1, 113.9, 120.1, 121.0, 123.3, 128.7, 133.4, 140.6, 150.6, 158.3, 163.6, 167.7, 167.9; HRMS Calcd for  $\text{C}_{15}\text{H}_{23}\text{NO}_3$ :  $\text{M}^+$ , 263.1521. Found:  $m/z$  263.1521.

**A mixture of *N*-(cyclopropylmethyl)-*N*-propyl-5-methylantranilic acid (3ih) and *N*-(cyclopropylmethyl)-*N*-propyl-4-methylantranilic acid (3'ih) (3ih:3'ih = 42:58)**

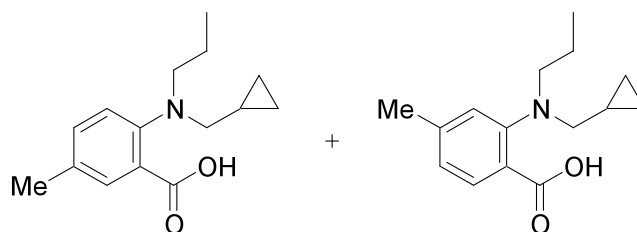

Isolated in 55% yield as a pale yellow solid: mp 57–61 °C;  $^1\text{H}$  NMR ( $\text{CDCl}_3$ )  $\delta$  -0.06–0.08 (m), 0.11–0.25 (m), 0.34–0.62 (m), 0.76–0.95 (m), 1.20–1.40 (m), 1.50–1.68 (m), 2.38 (s, *minor*), 2.41 (s, *major*), 2.79–3.02 (m), 3.07–3.23 (m), 7.14 (s, *major*), 7.19 (dd,  $J$  = 8.0, 1.0 Hz, *major*), 7.24 (d,  $J$  = 8.2 Hz, *minor*), 7.37 (ddd,  $J$  = 7.5, 2.2, 0.7 Hz, *minor*), 8.11 (d,  $J$  = 1.7 Hz, *minor*), 8.17 (d,  $J$  = 8.0 Hz, *major*);  $^{13}\text{C}$  NMR ( $\text{CDCl}_3$ )  $\delta$  4.0, 4.4, 8.0, 8.1, 11.47, 11.49, 19.78, 19.88, 20.9, 21.6, 58.0, 58.1, 62.40, 62.43, 122.2, 122.9, 124.7, 127.0, 128.4, 131.6, 131.9, 134.2, 137.6, 144.4, 145.8, 148.7, 168.0, 168.2; HRMS Calcd for  $\text{C}_{15}\text{H}_{21}\text{NO}_2$ :  $\text{M}^+$ , 247.1572. Found:  $m/z$  247.1577.

## References

1. Himeshima, Y.; Sonoda, T.; Kobayashi, H. *Chem. Lett.* **1983**, 1211–1214.
2. Yoshida, H.; Terayama, T.; Ohshita, J.; Kunai, A. *Chem. Commun.* **2004**, 1980–1981.
3. Yoshida, H.; Sugiura, S.; Kunai, A. *Org. Lett.* **2002**, *4*, 2767–2769.
4. Yoshida, H.; Ikadai, J.; Shudo, M.; Ohshita, J.; Kunai, A. *J. Am. Chem. Soc.* **2003**, *125*, 6638–6639.
5. Yoshikawa, E.; Radhakrishnan, K. V.; Yamamoto, Y. *J. Am. Chem. Soc.* **2000**, *122*, 7280–7286.
6. Yamagishi, T.; Okumura, Y.; Nukui, S.; Nakao, K. (PFIZER INC., PFIZER JAPAN INC.) WO 2005021508, **2005**.

\_DEFAULT.ALS

Thu Aug 23 08:57:16 2007

1H  
NON

270.05 MHz

112.00 KHz

5800.00 Hz

16384

5401.76 Hz

16

3.0331 sec

3.9670 sec

5.40 usec

1H

18.6 c

CDCL3

7.26 ppm

0.12 Hz

19

DFILE  
COMNT  
DATIM  
OBNUC  
EXMOD  
OBFRO  
OBSET  
OBFIN  
POINT  
FREQU  
SCANS  
ACQTM  
PD  
PW1  
IRNUC  
CTEMP  
SLVNT  
EXREF  
BF  
RGAIN

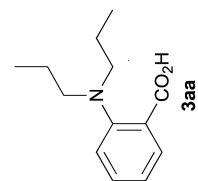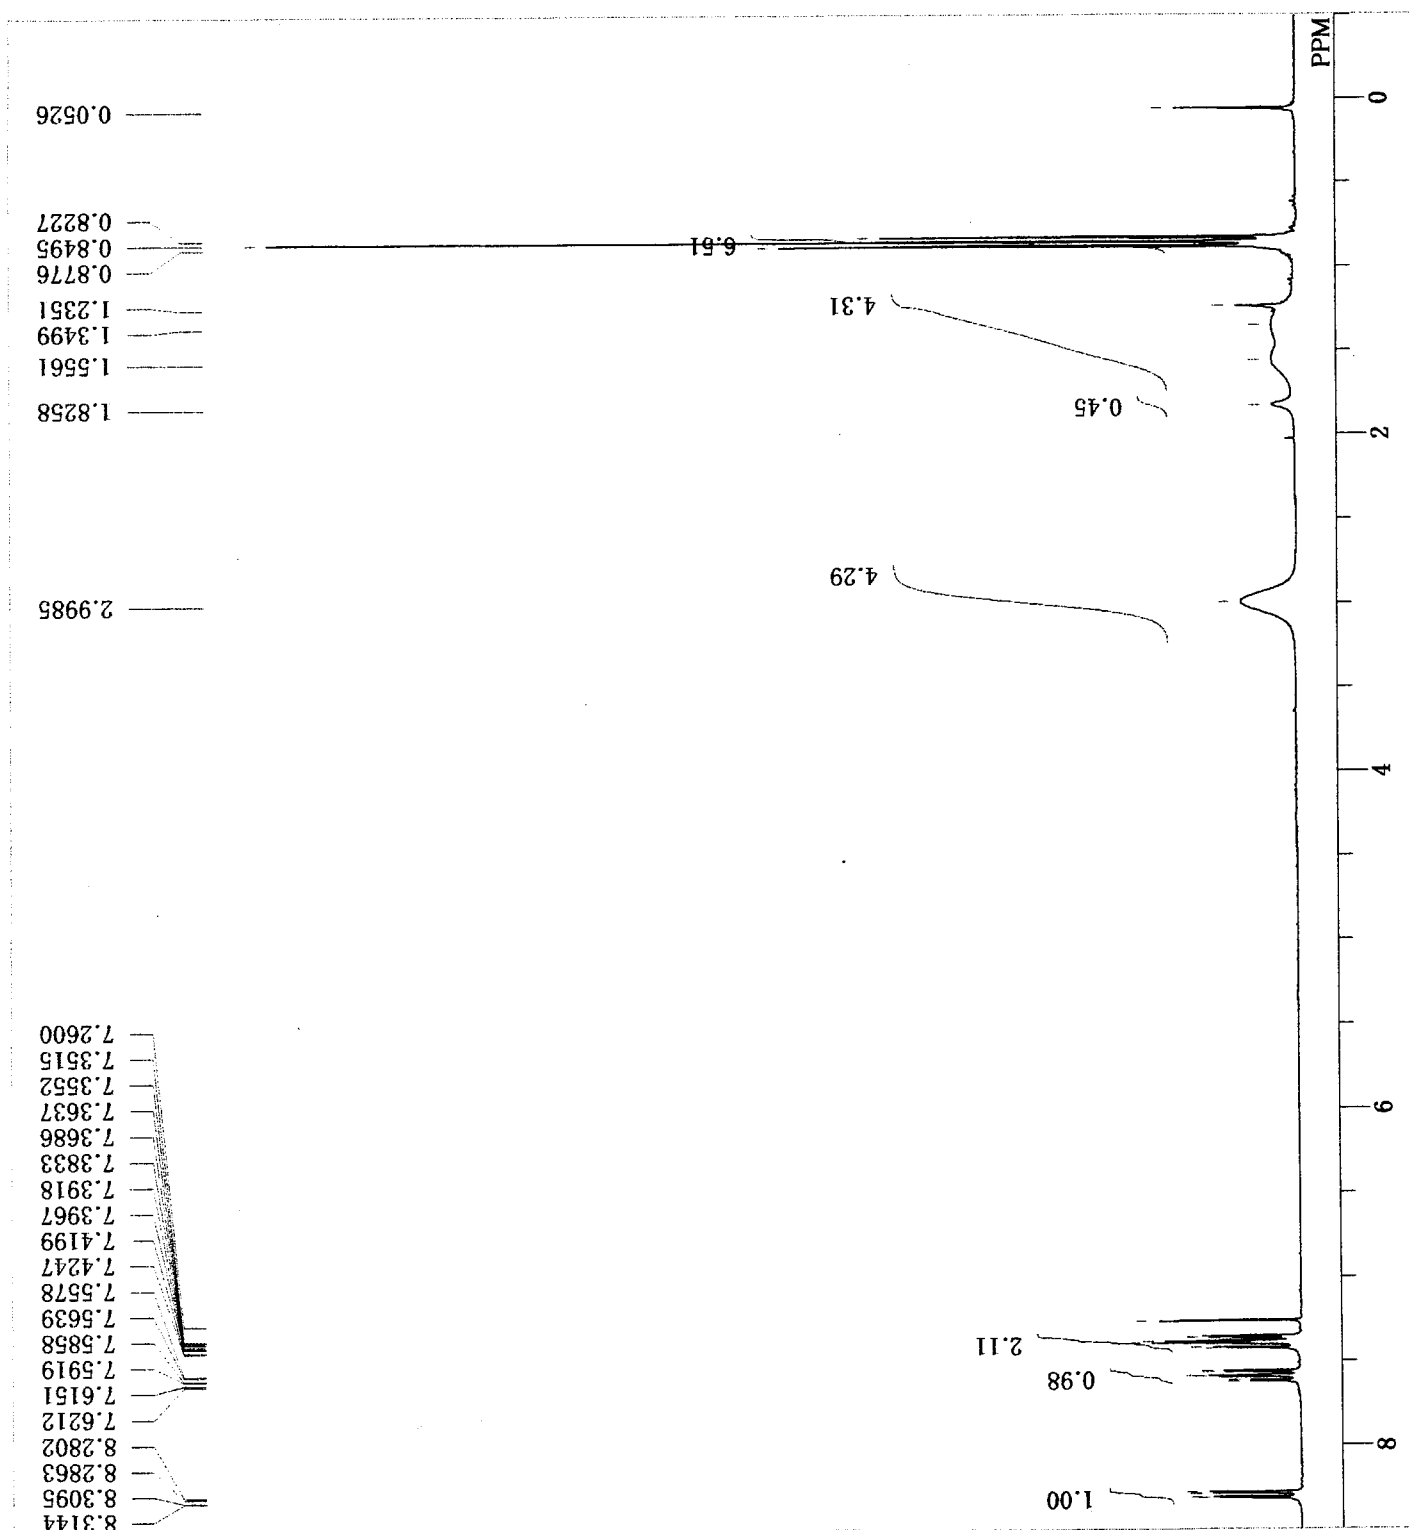

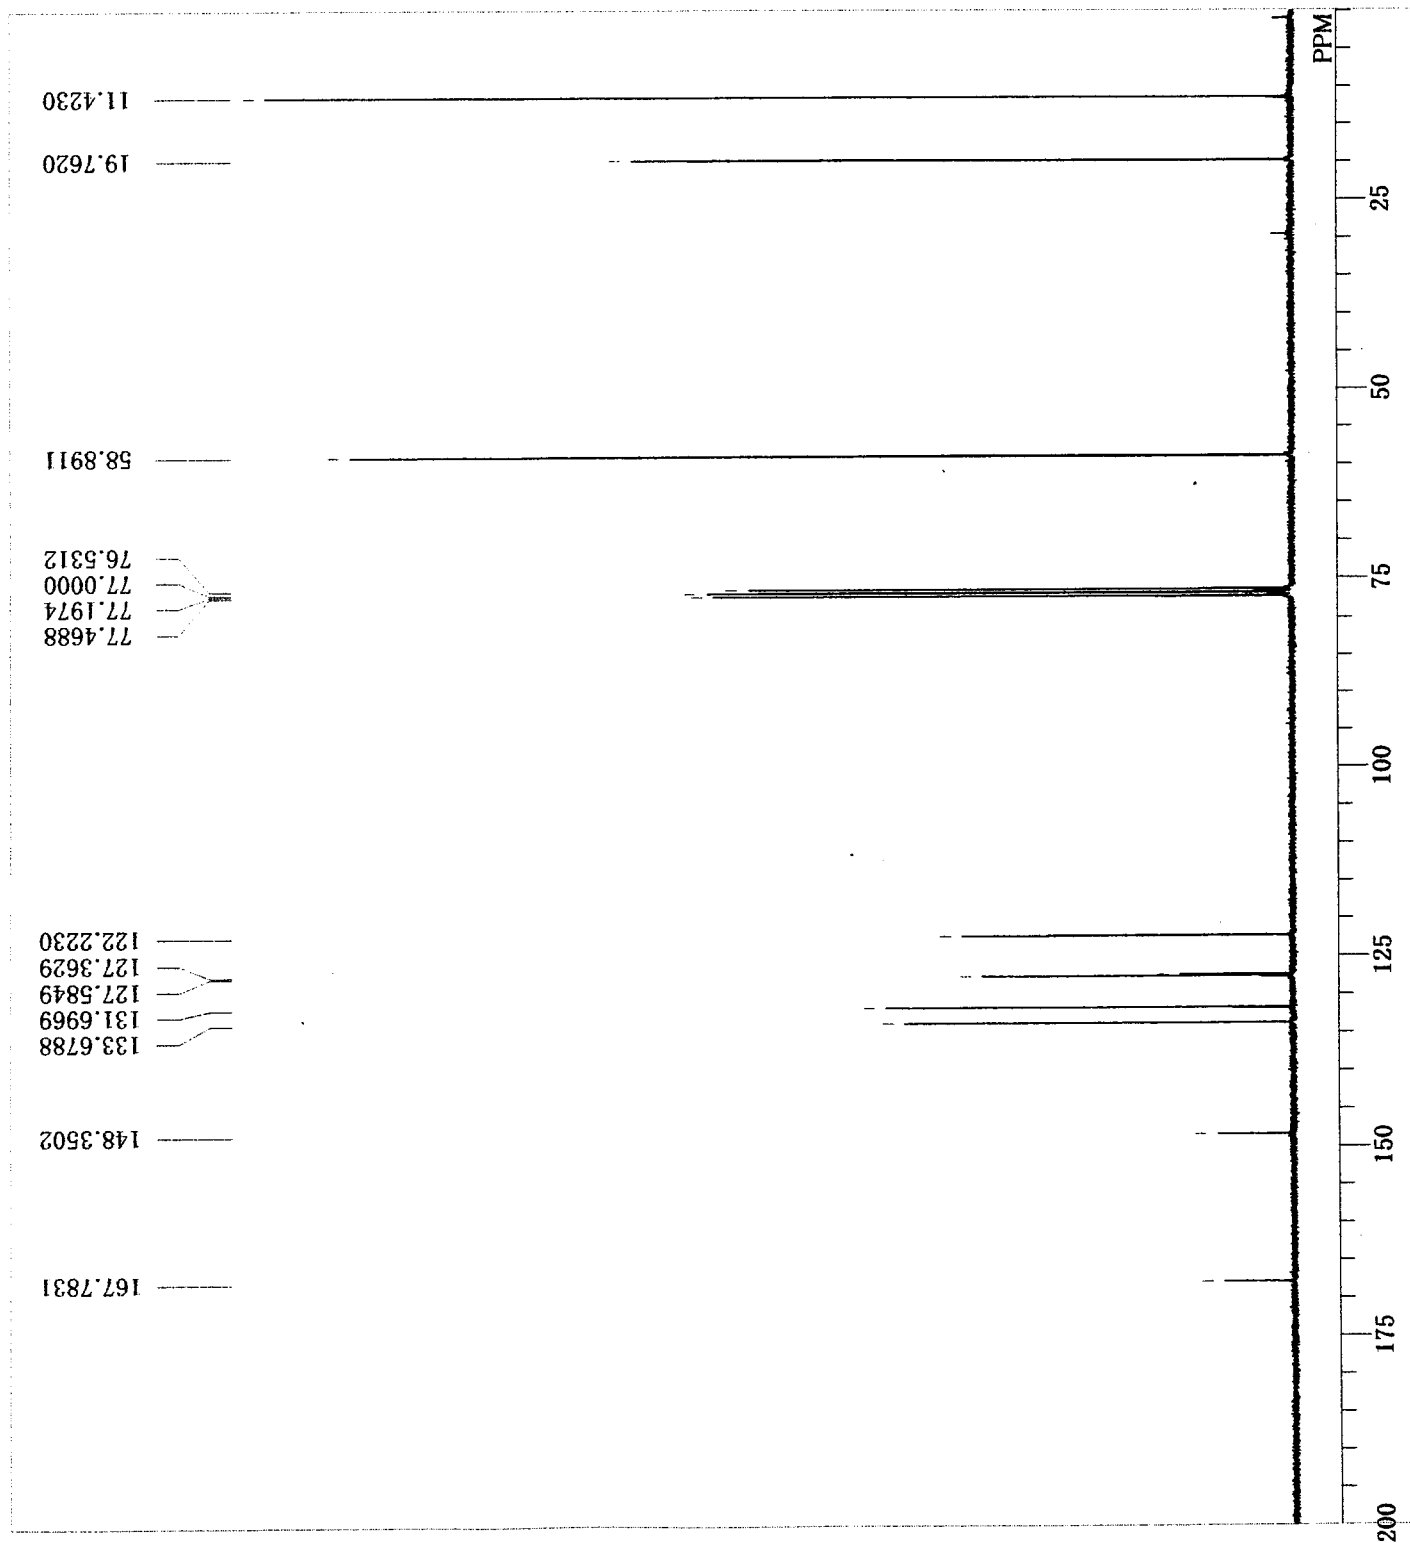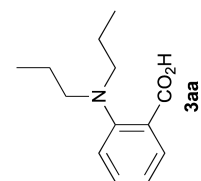

DFILE COMNT  
COMNT  
DATIM Thu Aug 23 08:43:15 2007  
OBNUC 13C  
EXMOD BCM  
OBFRQ 67.80 MHz  
OBSET 135.00 KHz  
OBFIN 5200.00 Hz  
POINT 32768  
FREQU 18306.64 Hz  
SCANS 11537  
ACQTM 1.7900 sec  
PD 1.2100 sec  
PW1 3.50 usec  
IRNUC 1H  
CTEMP 19.5 c  
SLVNT CDCL3  
EXREF 77.00 ppm  
BF 0.12 Hz  
RGAIN 26

1H Line 061221-10-356-1

Date : Tue Dec 19 06:40:30 2006  
 File Name : LoadingFID.nmdata  
 Comment : 1H Line  
 Slice History : none  
 EXMODE : none  
 POINT : 32768 points  
 SAMP0 : 32768 points  
 FREQ0 : 7917.7 Hz  
 FILTR : 3950 Hz  
 DELAY : 50.6 usec  
 DEACT : 73.4 usec  
 INVL : 126.3 usec  
 TIMES : 16 times  
 DUMMY : 1 times  
 PD : 2.8614 sec  
 ACQTM : 4138.5986 msec  
 PREDL : 0.01000 msec  
 INWT : 1000.0000 msec  
 RESOL : 0.24 Hz  
 PW1 : 5.05 usec  
 1H : 395.75 MHz  
 OBSFQ : 134498.00 Hz  
 OBSRT : 18  
 SCANS : 16 times  
 SLVNT : CDCl3  
 SPINNING : 19 Hz  
 TEMP : 18.6 C

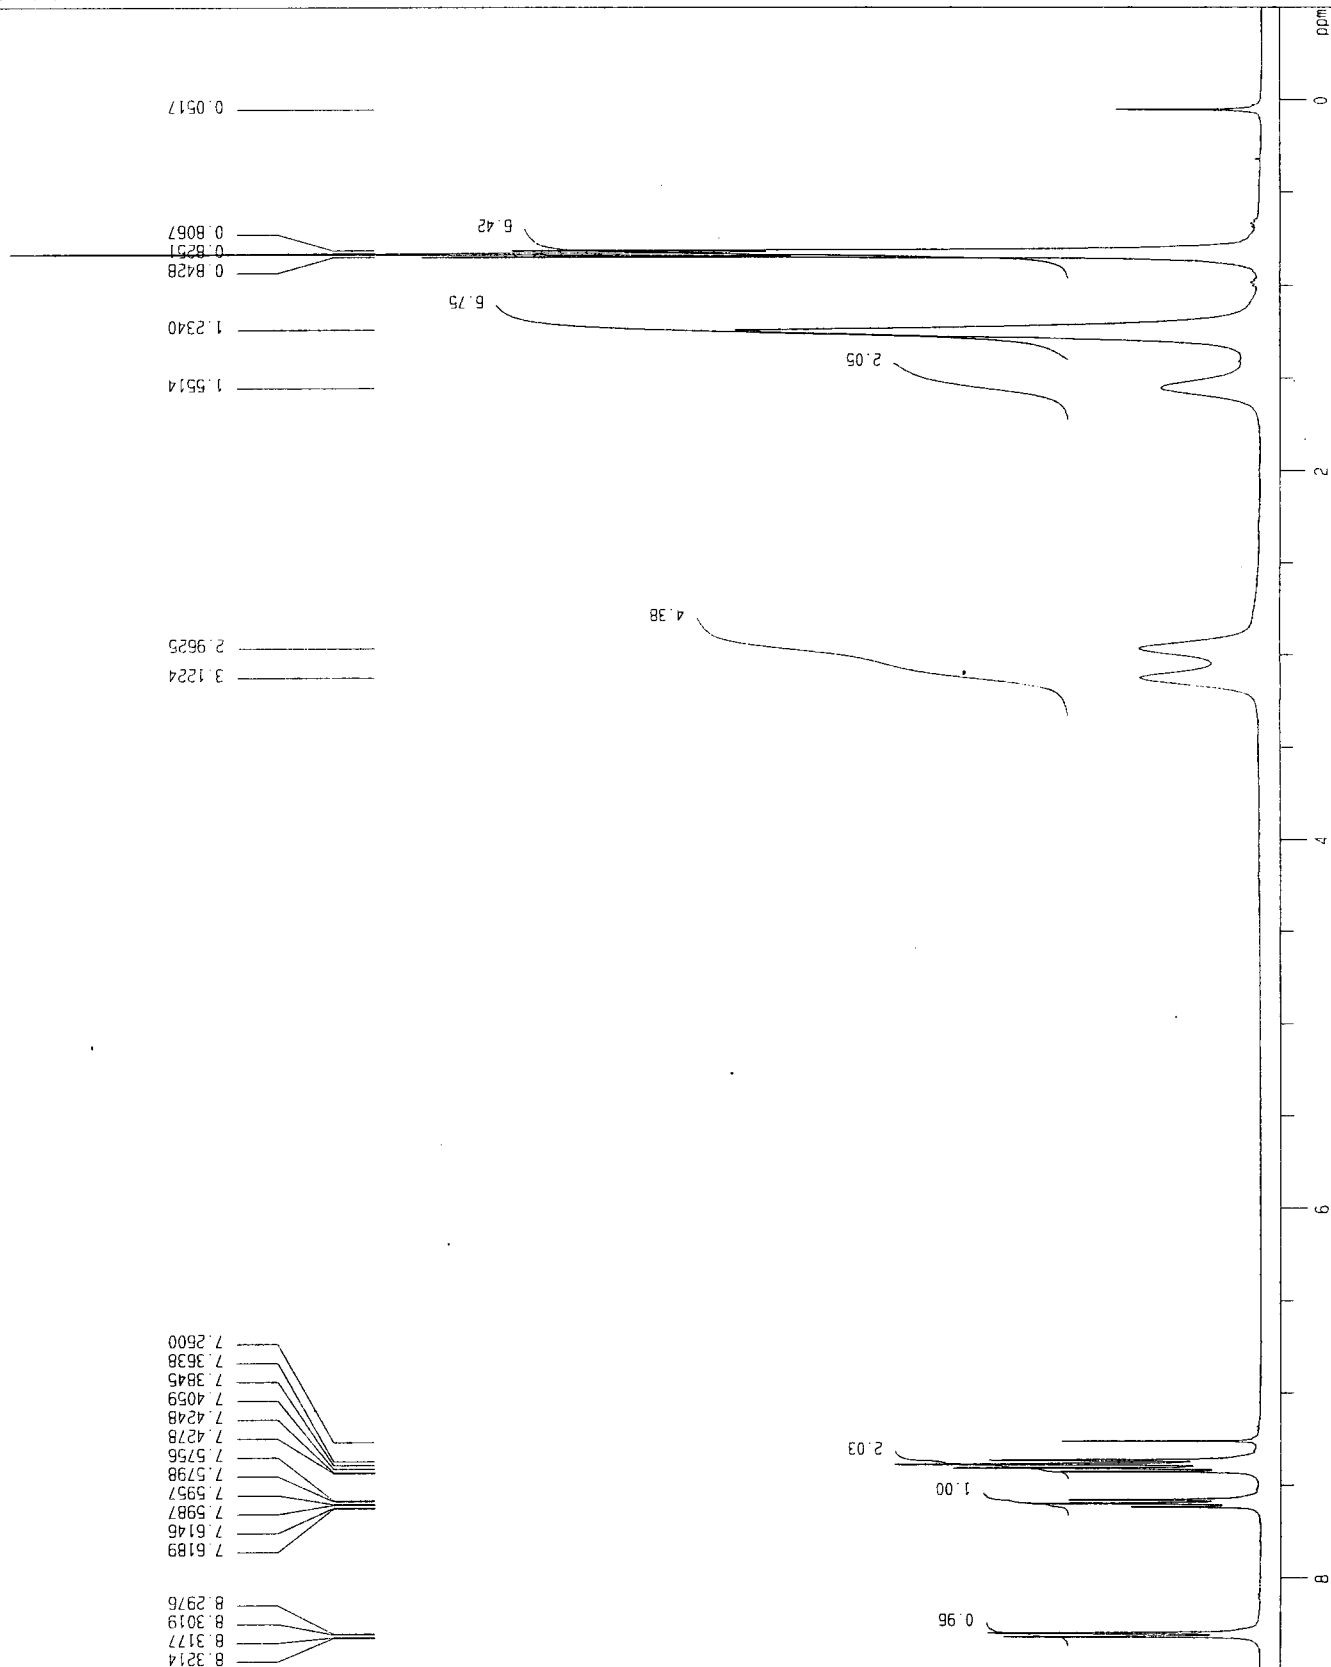

1H Line 06/22 3-10-356-1-13C

Date : Tue Jan 17 01:41:37 2006

FileName : .LoadingFID.nmdata  
 Comment : 1H Line  
 SliceHistory :  
 EXMODE : bcm

POINT : 32768 points  
 SAMPO : 32768 points  
 FREQU : 26881.7 Hz  
 FILTR : 13450 Hz  
 DELAY : 14.9 usec  
 DEADT : 19.1 usec  
 INTVL : 37.2 usec  
 TIMES : 3000 times  
 DUMMY : 4 times  
 PD : 1.7810 sec  
 ACQTM : 1218.9696 msec  
 PREDL : 0.01000 msec  
 INIWT : 1000.0000 msec  
 RESOL : 0.82 Hz  
 PW1 : 6.50 usec  
 13C :  
 OBNUC : 99.45 MHz  
 OBFRQ : 104750.00 Hz  
 OBSET : 28  
 RGAIN :  
 IRNUC : 395.75 MHz  
 IRFRQ : 134498.00 Hz  
 IRSET : 45.0 usec  
 IRRPW : 0  
 IRNRS :  
 SCANS : 1950 times  
 SLVNT : CDCL3  
 SPINNT : 12 Hz  
 TEMP : 20.5 C

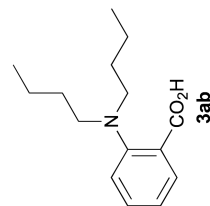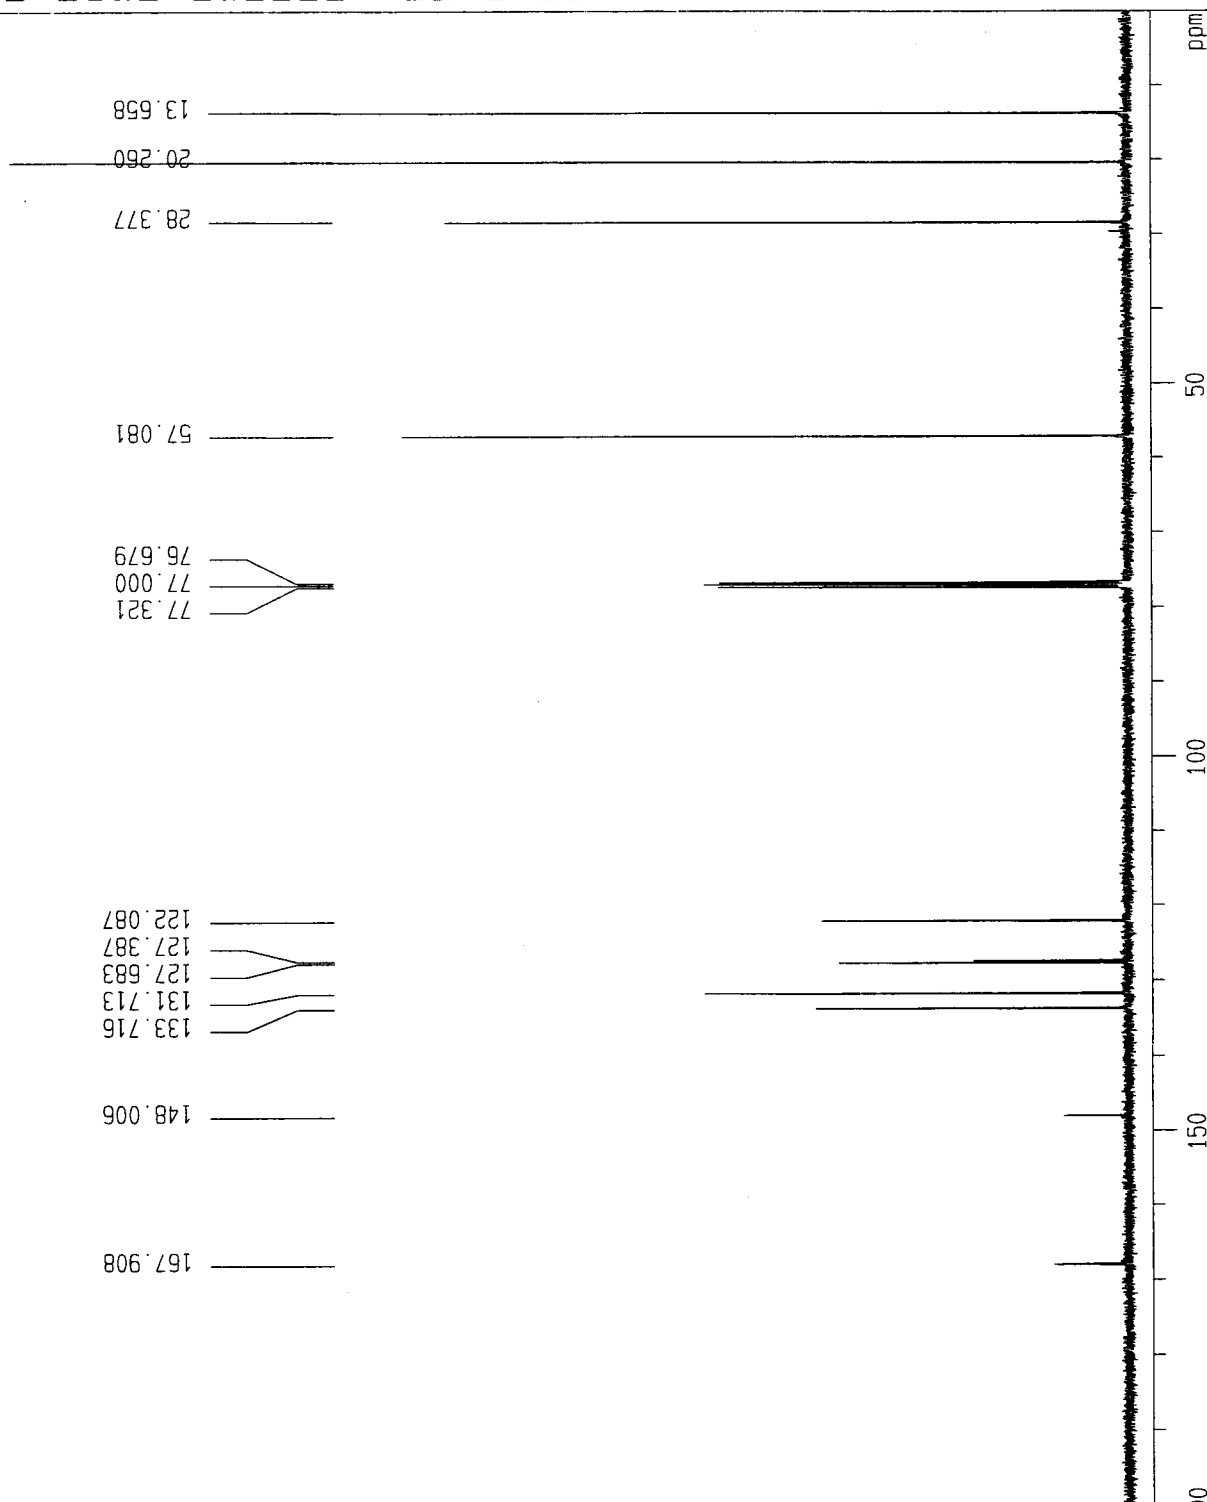

1H Line 070510-12-427-3

Date : Mon May 7 11:31:03 2007  
 File Name : .LoadingFID.nmdata  
 Comment : 1H Line  
 Slice History :  
 EXMODE : non  
 POINT : 32768 points  
 SAMPO : 32768 points  
 FREQU : 7917.7 Hz  
 FILTR : 3950 Hz  
 DELAY : 50.6 usec  
 DEADT : 73.4 usec  
 INTVL : 126.3 usec  
 TIMES : 32 times  
 DUMMY : 1 times  
 PD : 2.8614 sec  
 ACQTM : 4138.5986 msec  
 PREDL : 0.01000 msec  
 INIWT : 1000.0000 msec  
 RESOL : 0.24 Hz  
 PW1 : 5.05 usec  
 OBNUC : 1H  
 OBFRQ : 395.75 MHz  
 OBSET : 134498.00 Hz  
 RGAIN : 22  
 SCANS : 32 times  
 SLVNT : CDCL3  
 SPINNING : 20 Hz  
 TEMP : 19.3 C

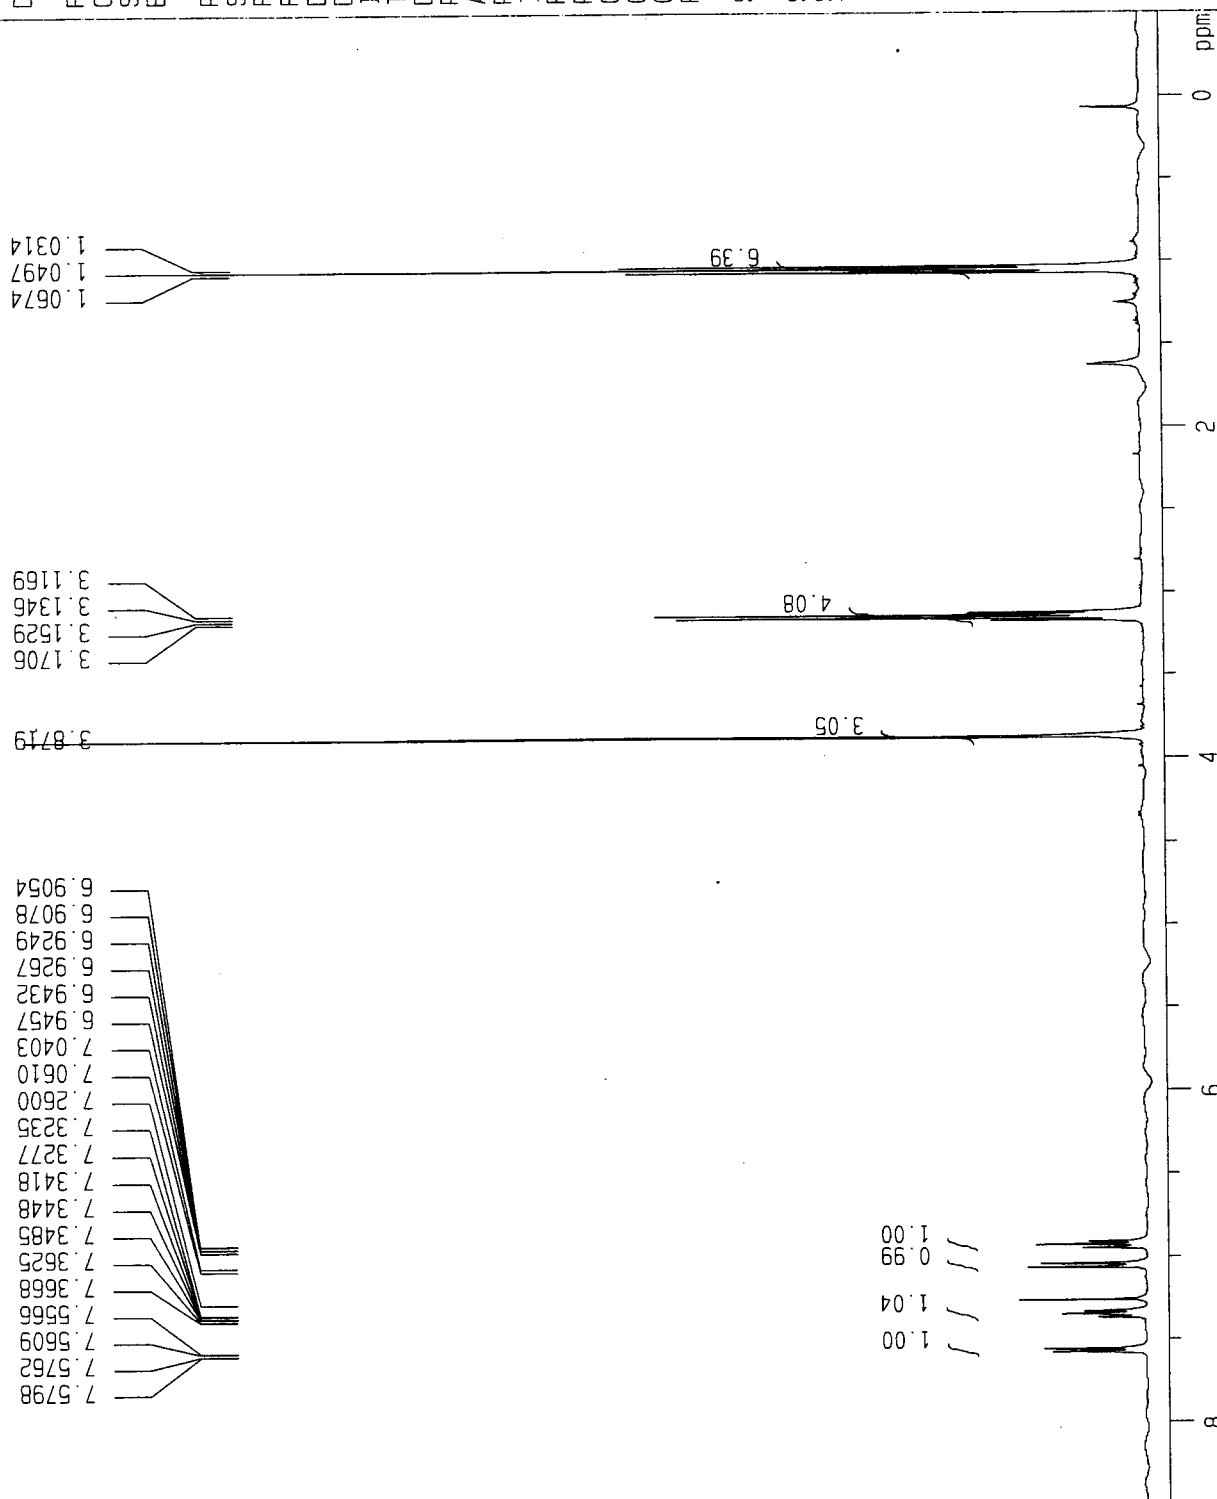



1H Line

070510-12-427-3-13C

Date : Mon Feb 12 01:43:45 2007

FileName : .LoadingFID.nmdata  
 Comment : 1H Line  
 SliceHistory :  
 EXMODE : bcm

POINT 32768 points  
 SAMPO 32768 points  
 FREQU 26881.7 Hz  
 FILTR 13450 Hz  
 DELAY 14.9 usec  
 DEADT 19.1 usec  
 INTVL 37.2 usec  
 TIMES 20000 times  
 DUMMY 4 times  
 PD 1.7810 sec  
 ACQTM 1218.9696 msec  
 PREDL 0.01000 msec  
 INIWT 1000.0000 msec  
 RESOL 0.82 Hz  
 PW1 6.50 usec  
 OBNUC 13C  
 OBFRQ 99.45 MHz  
 OBSET 104750.00 Hz  
 RGAIN 28  
 IRNUC 1H  
 IRFRQ 395.75 MHz  
 IRSET 134498.00 Hz  
 IRRPW 45.0 usec  
 IRNRS 0

SCANS : 12452 times

SLVNT : CDCL3  
 SPINNING 4 Hz  
 TEMP 19.6 C

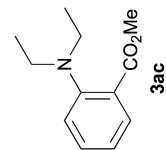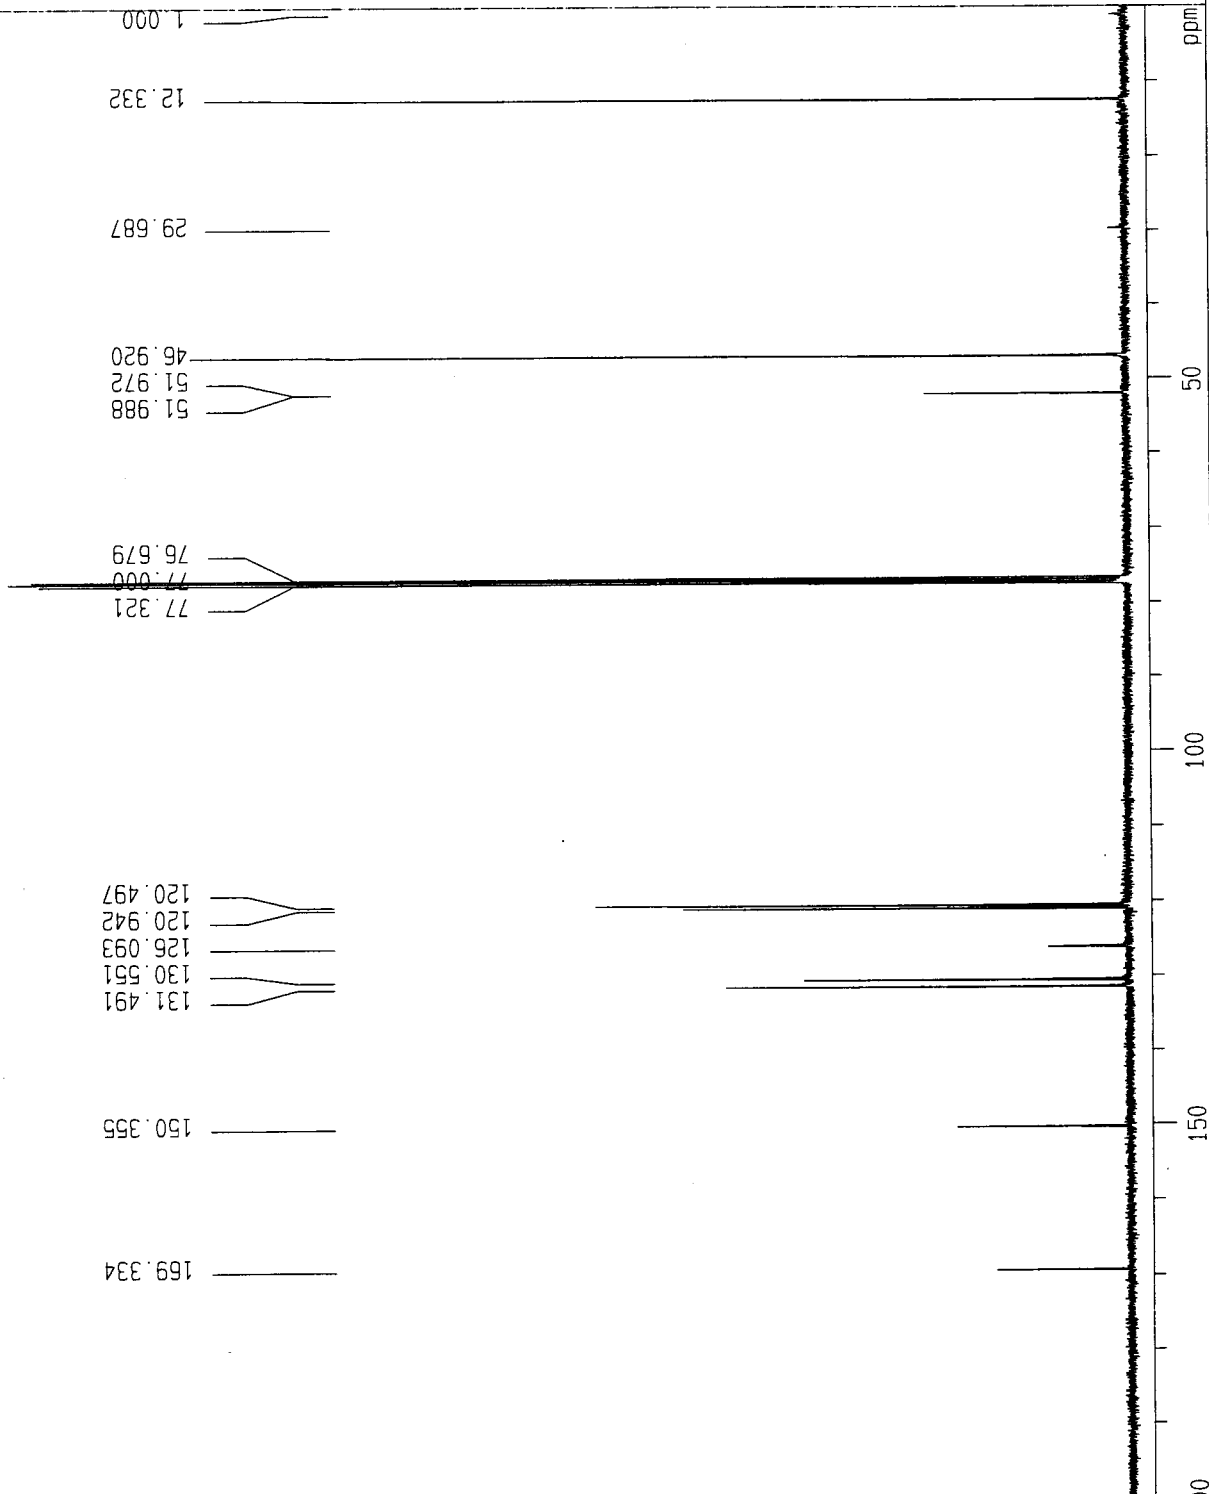

1H Line 070515-12-441-3

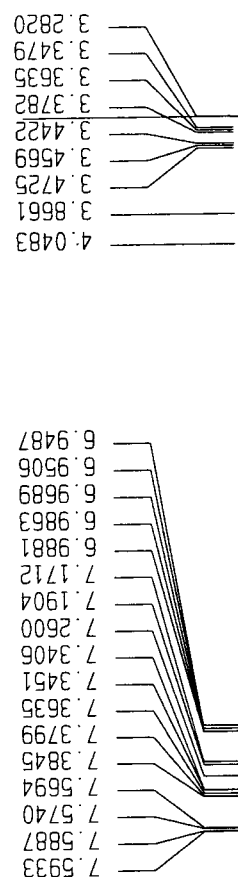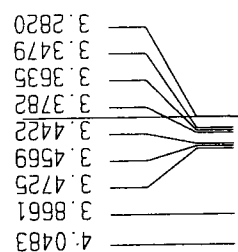

Date : Sat May 12 11:54:58 2007  
 File Name : .LoadingFID.nmdata  
 Comment : 1H Line  
 Slice History :  
 EXMODE : non  
 POINT : 32768 points  
 SAMPO : 32768 points  
 FREQ : 11876.5 Hz  
 FILTR : 5950 Hz  
 DELAY : 33.6 usec  
 DEADT : 47.9 usec  
 INTVL : 84.2 usec  
 TIMES : 16 times  
 DUMMY : 1 times  
 PD : 4.2409 sec  
 ACQTM : 2759.0657 msec  
 PREDL : 0.01000 msec  
 INIWT : 1000.0000 msec  
 RESOL : 0.36 Hz  
 PW1 : 5.05 usec  
 1H :  
 OBNUC : 395.75 MHz  
 OBFRQ : 134498.00 Hz  
 OBSET : 17  
 RGAIN :  
 SCANS : 16 times  
 SLVNT : CDCL3  
 SPINNING : 16 Hz  
 TEMP : 19.3 C

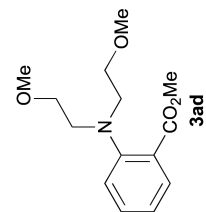

1.00  
1.03  
1.05  
1.03

1H Line 070515-12-441-3-13C

Date : Mon Feb 12 01:43:45 2007  
 FileName : .LoadingFID.nmdata  
 Comment : 1H Line  
 SliceHistory :  
 EXMODE : bcm

POINT : 32768 points  
 SAMPO : 32768 points  
 FREQU : 26881.7 Hz  
 FILTR : 13450 Hz  
 DELAY : 14.9 usec  
 DEADT : 19.1 usec  
 INTVL : 37.2 usec  
 TIMES : 20000 times  
 DUMMY : 1 times  
 PD : 1.7810 sec  
 ACQTM : 1218.9696 msec  
 PREDL : 0.01000 msec  
 INIWT : 1000.0000 msec  
 RESOL : 0.82 Hz  
 PW1 : 6.50 usec  
 13C :  
 OBNUC : 99.45 MHz  
 OBFRQ : 104750.00 Hz  
 OBSET : 31  
 RGAIN :  
 IRNUC : 395.75 MHz  
 IRFRQ : 134498.00 Hz  
 IRSET : 45.0 usec  
 IRRPW : 0  
 IRRNS :  
 SCANS : 1516 times  
 SLVNT : CDCL3  
 SPINNING : 18 Hz  
 TEMP : 19.5 C

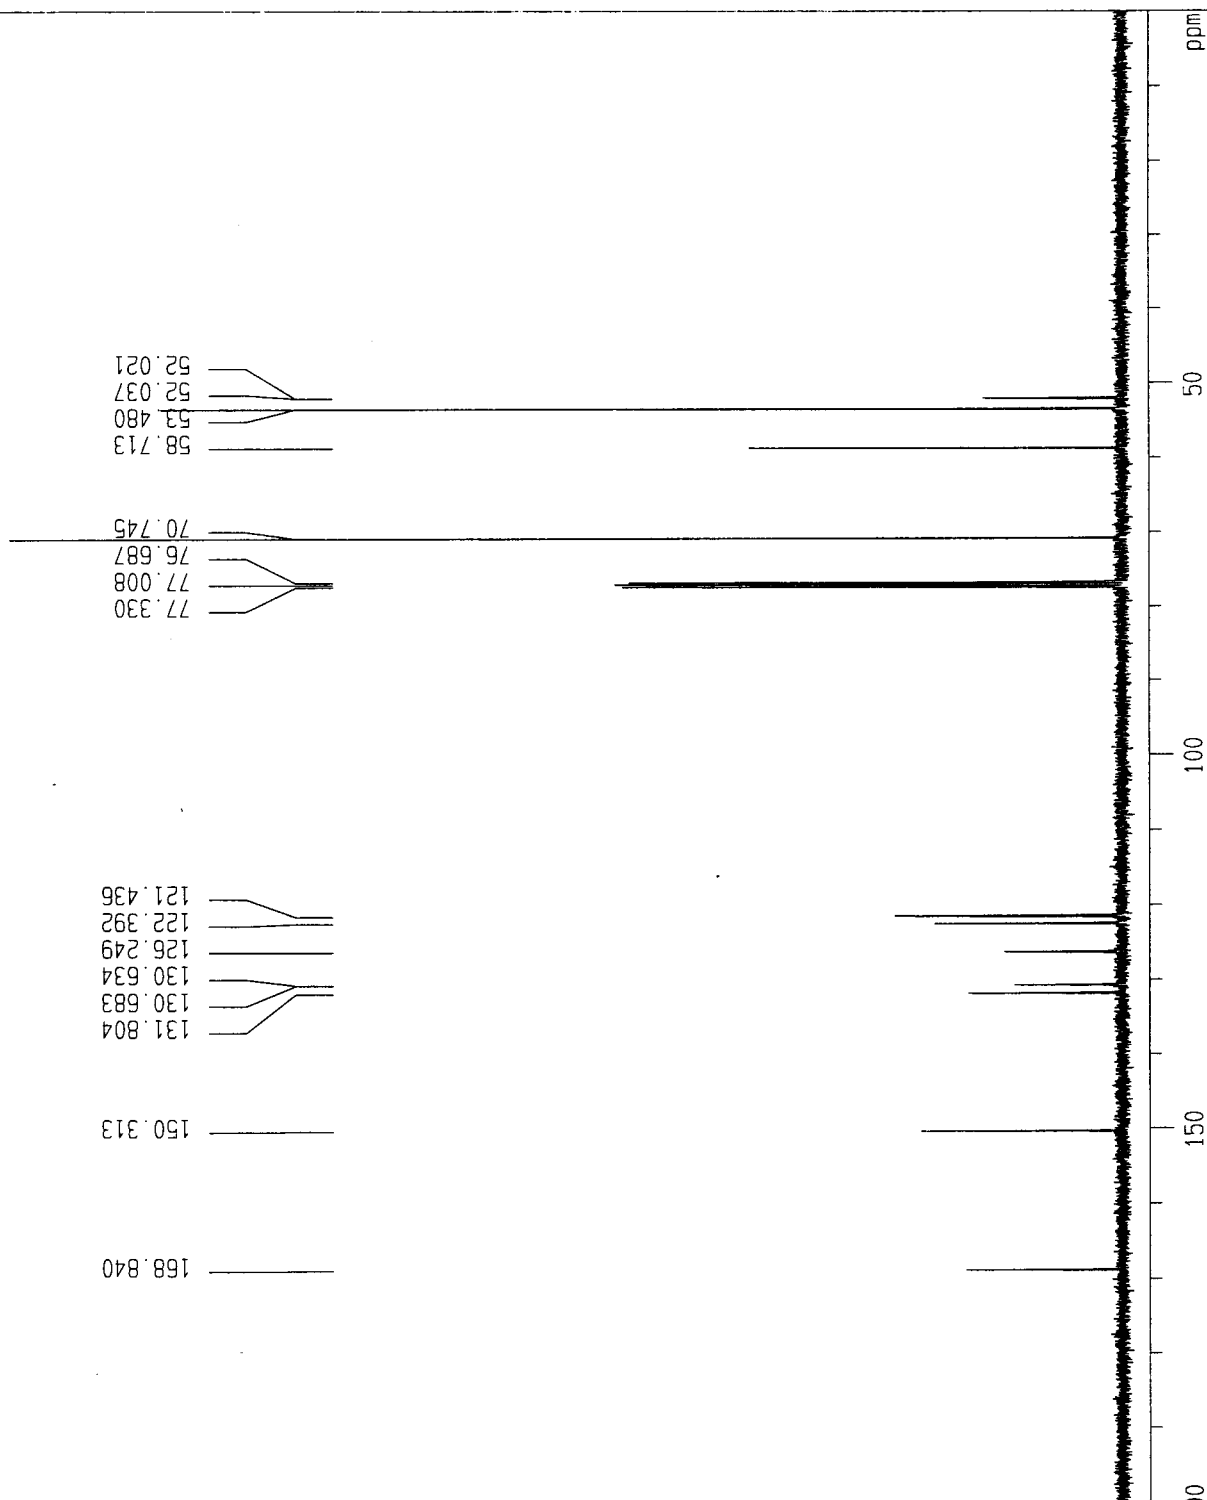

1H Line

070522-13-487-3

Date : Sat May 19 12:59:17 2007

File Name : .LoadingFID.nmdata  
 Comment : 1H Line  
 Slice History :  
 EXMODE : non

POINT : 32768 points  
 SAMPO : 32768 points  
 FREQU : 7917.7 Hz  
 FILTR : 3950 Hz  
 DELAY : 50.6 usec  
 DEADT : 73.4 usec  
 INTVL : 126.3 usec  
 TIMES : 16 times  
 DUMMY : 1 times  
 PD : 2.8614 sec  
 ACQTM : 4138.5986 msec  
 PREDL : 0.01000 msec  
 INIWT : 1000.0000 msec  
 RESOL : 0.24 Hz  
 PW1 : 5.05 usec  
 1H :  
 OBNUC : 395.75 MHz  
 OBFRQ : 134498.00 Hz  
 OBSET : 18  
 RGAIN : 18

SCANS : 16 times

SLVNT : CDCL3  
 SPINNING : 17 Hz  
 TEMP : 19.6 C

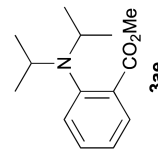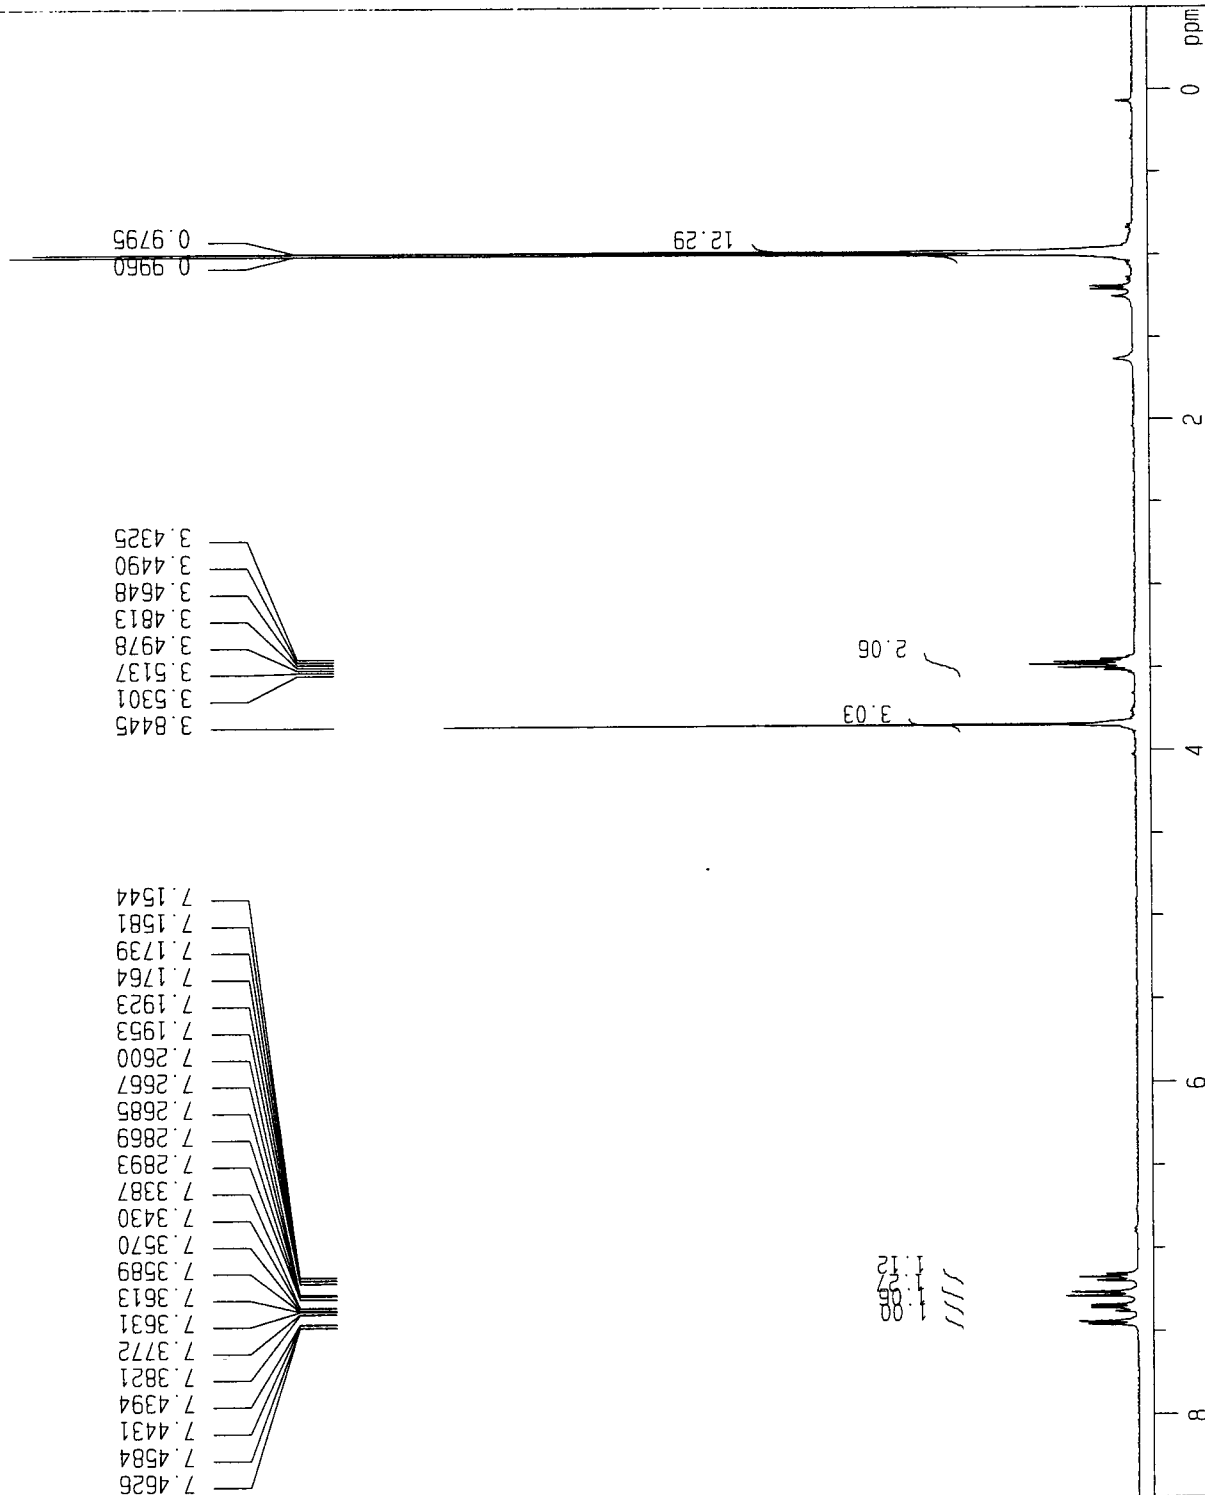

1H Line 070522-13-445-3-13C

Date : Mon Feb 12 01:43:45 2007

FileName : .LoadingFID.nmdata  
 Comment : 1H Line  
 SliceHistory :  
 EXMODE : bcm

POINT : 32768 points  
 SAMP0 : 32768 points  
 FREQU : 26881.7 Hz  
 FILTR : 13450 Hz  
 DELAY : 14.9 usec  
 DEAT0 : 19.1 usec  
 INTVL : 37.2 usec  
 TIMES : 20000 times  
 DUMMY : 4 times  
 PD : 1.7810 sec  
 ACGTM : 1218.9696 msec  
 PREDL : 0.01000 msec  
 INIWT : 1000.0000 msec  
 RESOL : 0.82 Hz  
 PW1 : 6.50 usec  
 OBNUC : 13C  
 OBFRQ : 99.45 MHz  
 OBSET : 104750.00 Hz  
 RGAIN : 28  
 IRNUC : 1H  
 IRFRQ : 395.75 MHz  
 IRSET : 134498.00 Hz  
 IRRPW : 45.0 usec  
 IRRNS : 0

SCANS : 1960 times

SLVNT : CDCL3  
 SPINNING : 15 Hz  
 TEMP : 20.2 C

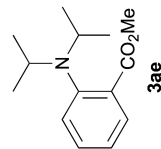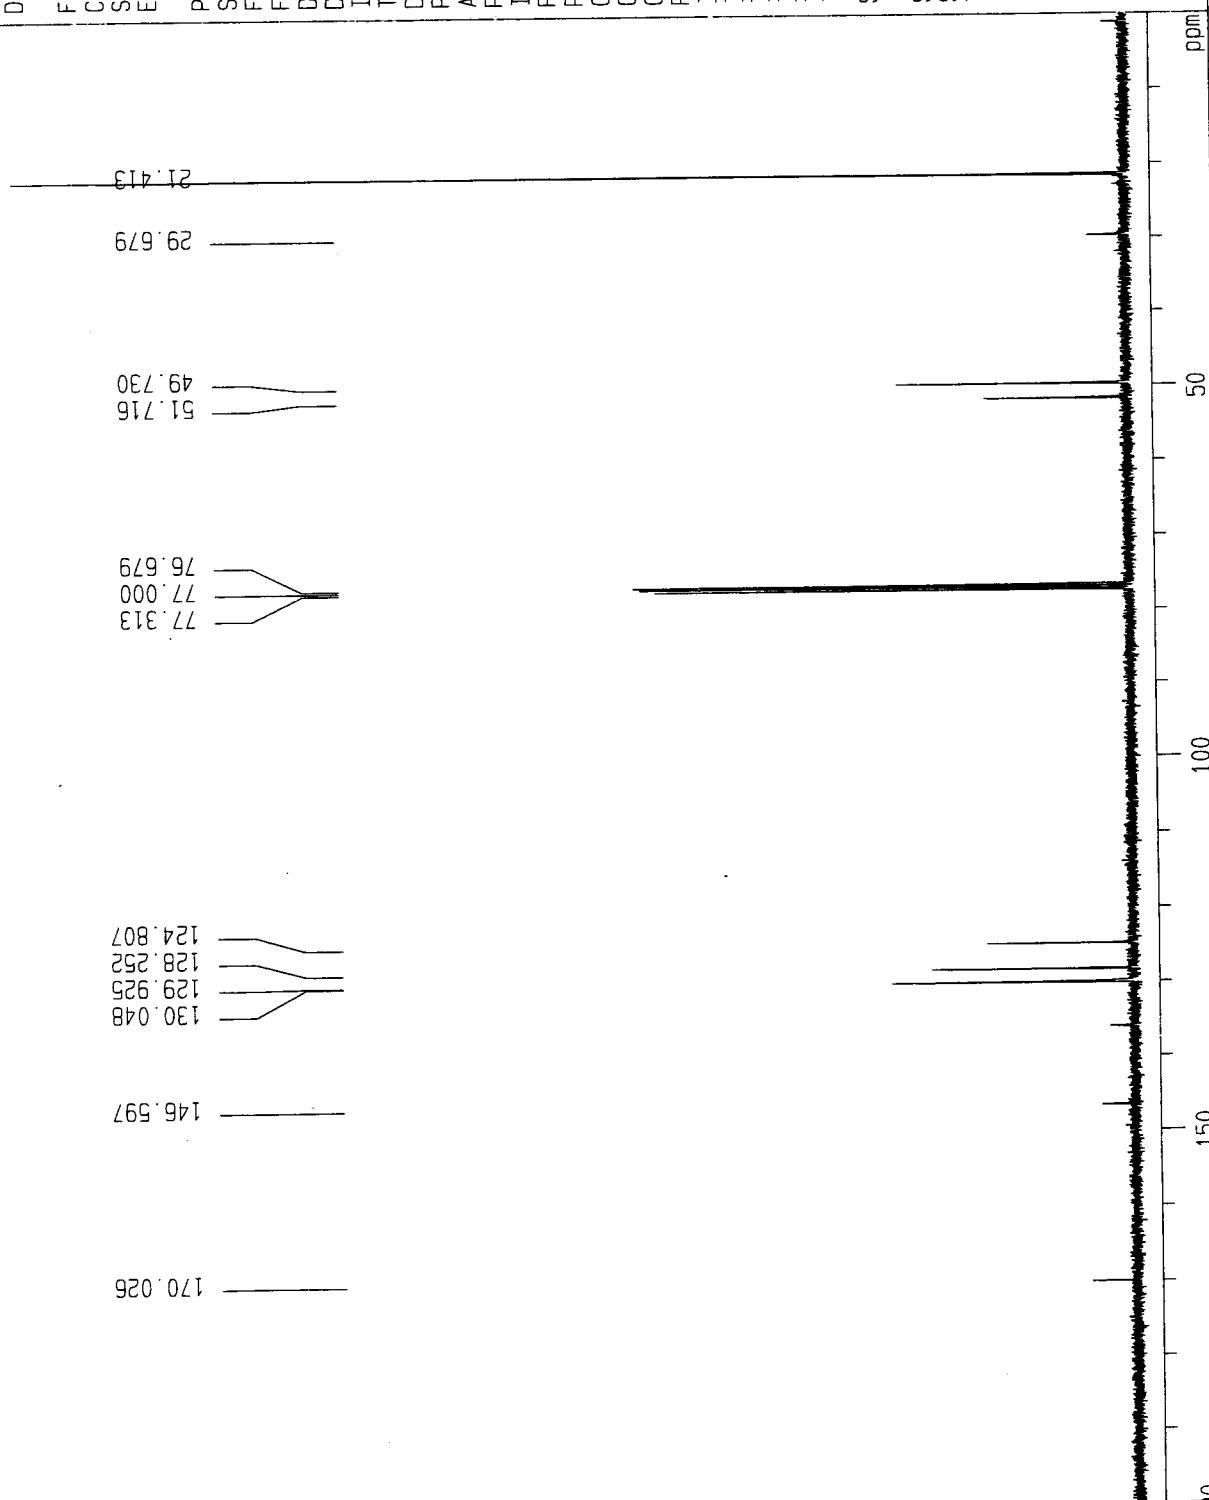

DEFAULT.ALS

Thu Nov 15 13:06:20 2007

1H  
NON

270.05 MHz  
112.00 KHz  
5800.00 Hz  
16384  
5401.76 Hz  
16  
3.0331 sec  
3.9670 sec  
5.40 usec  
1H  
19.5 c  
CDCL3  
7.26 ppm  
0.12 Hz  
16

DFILE  
COMNT  
DATIM  
OBNUC  
EXMOD  
OBFREQ  
OBSET  
OBFIN  
POINT  
FREQU  
SCANS  
ACQTM  
PD  
PW1  
IRNUC  
CTEMP  
SLVNT  
EXREF  
BF  
RGAIN

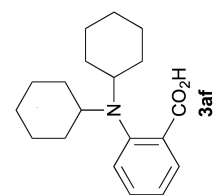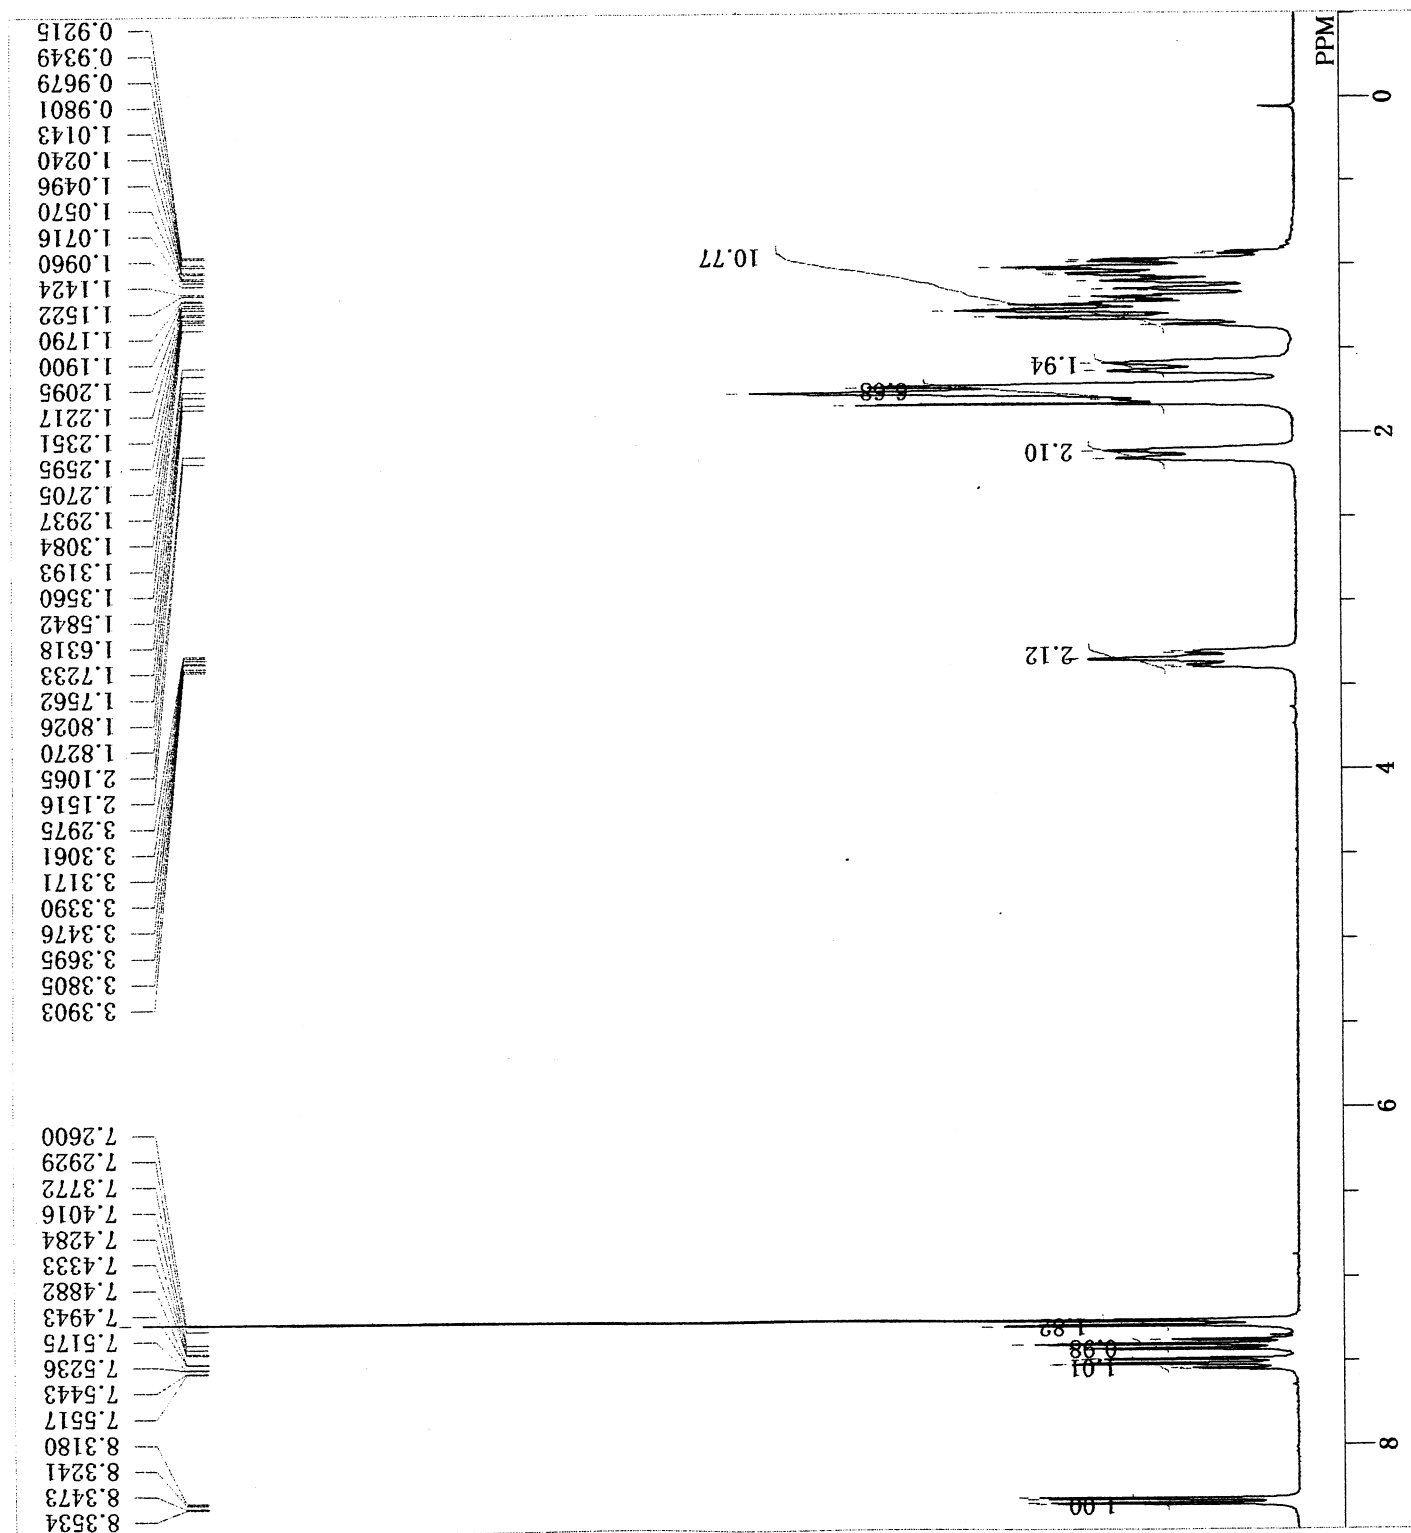

1H Line

090830-15 - 522-3-13C

Date : Mon Feb 12 01:43:45 2007

File Name : .LoadingFID.nmdata  
 Comment : 1H Line  
 Slice History :  
 EXMODE : bcm

POINT : 32768 points  
 SAMPD : 32768 points  
 FREQU : 26881.7 Hz  
 FILTR : 13450 Hz  
 DELAY : 14.9 usec  
 DEADT : 19.1 usec  
 INTVL : 37.2 usec  
 TIMES : 20000 times  
 DUMMY : 4 times  
 PD : 1.7810 sec  
 ACQTM : 1218.9696 msec  
 PREDL : 0.01000 msec  
 INIWT : 1000.0000 msec  
 RESOL : 0.82 Hz  
 PW1 : 6.50 usec  
 13C :  
 OBNUC : 99.45 MHz  
 OBFRQ : 104750.00 Hz  
 OBSET : 29  
 RGAIN :  
 IRNUC :  
 IRFRQ : 395.75 MHz  
 IRSET : 134498.00 Hz  
 IRRPW : 45.0 usec  
 IRRNS : 0

SCANS : 1658 times

SLVNT : CDCL3  
 SPINNING : 17 Hz  
 TEMP : 21.0 C

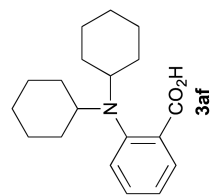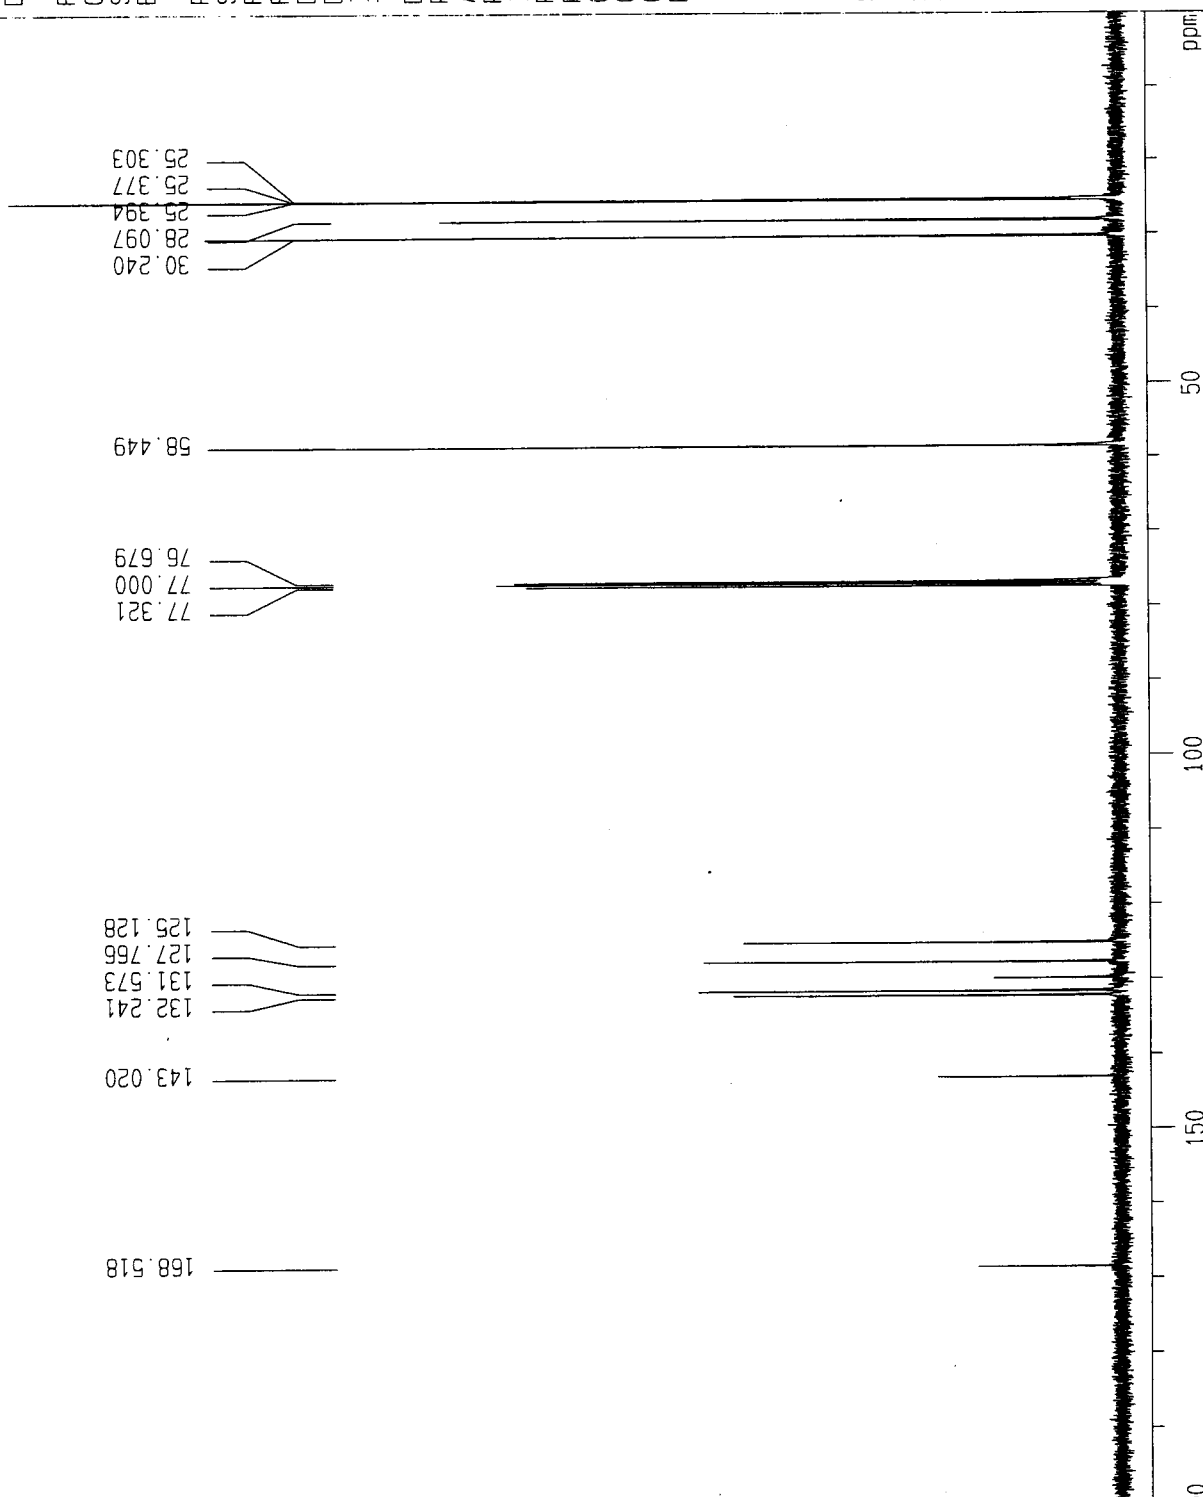

1H Line

070521-13-446-3

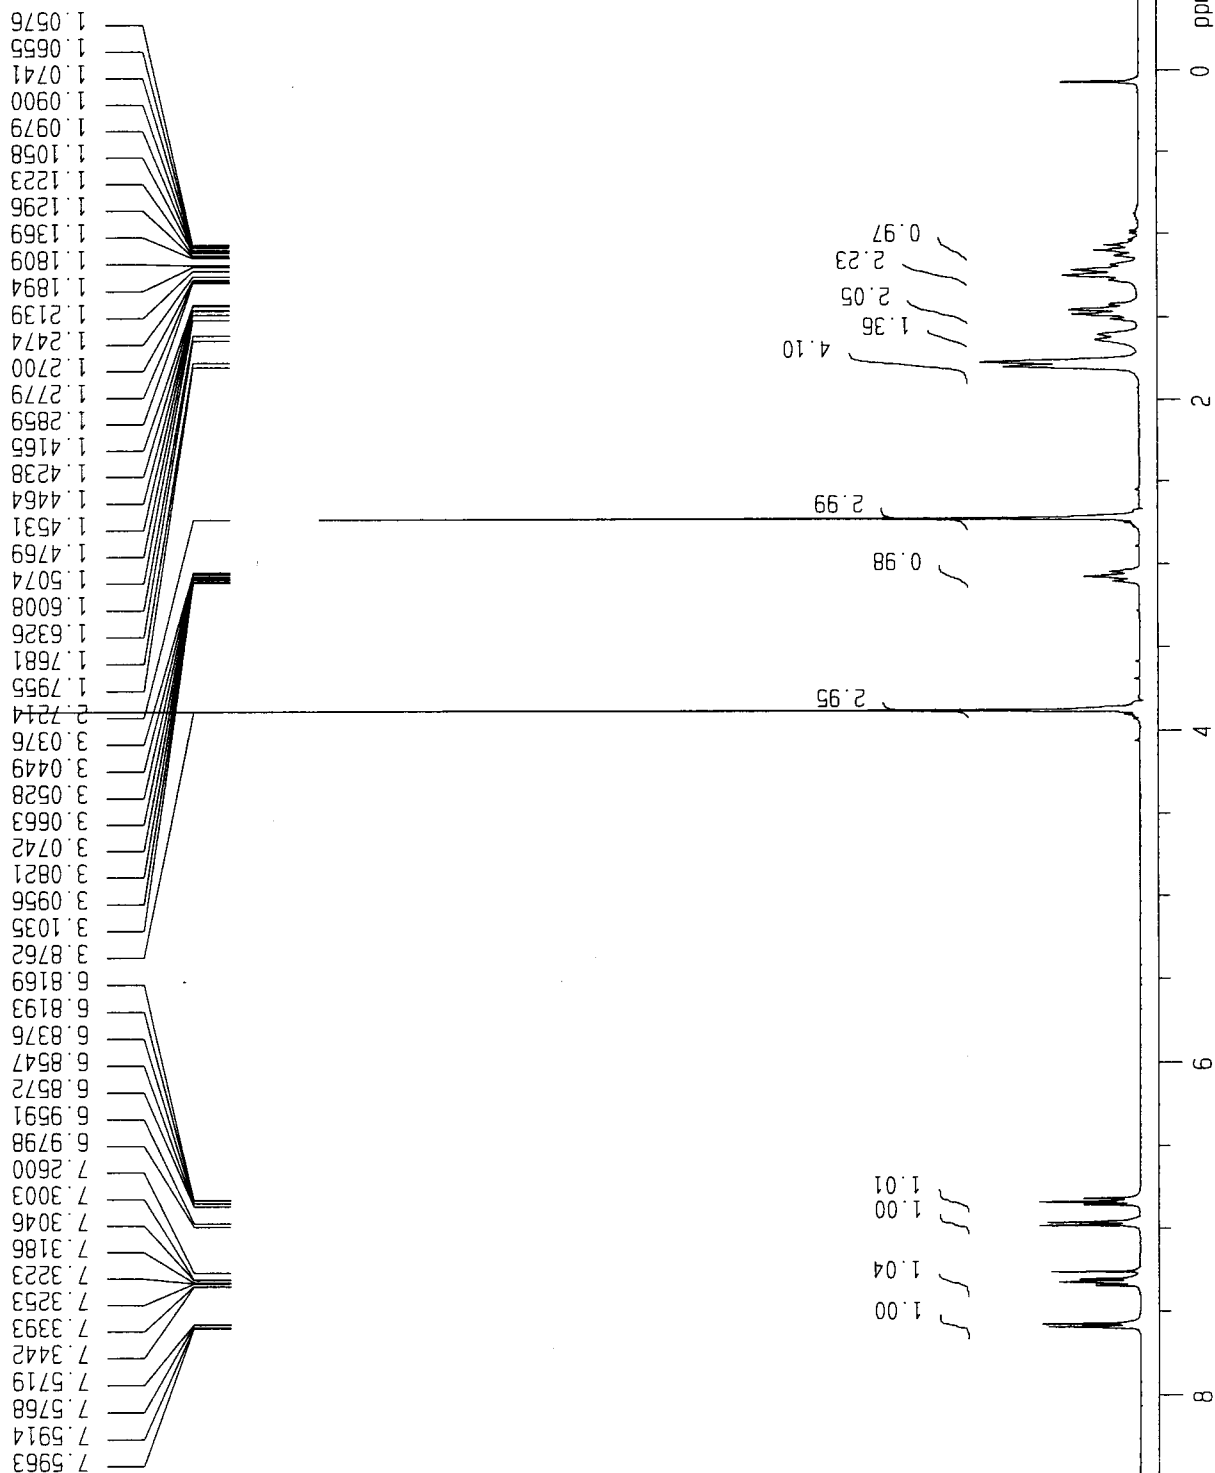

Date : Fri May 18 14:23:39 2007

File Name : LoadingFID.nmdata

Comment : 1H Line

SliceHistory : non

EXMODE : non

POINT : 32768 points

SAMPO : 32768 points

FREQU : 7917.7 Hz

FILTR : 3950 Hz

DELAY : 50.6 usec

DEADT : 73.4 usec

INTVL : 126.3 usec

TIMES : 16 times

DUMMY : 1 times

PD : 2.8614 sec

ACQTM : 4138.5986 msec

PREDL : 0.0100 msec

INIWT : 1000.0000 msec

RESOL : 0.24 Hz

PW1 : 5.05 usec

1H : 1H

OBNUC : 395.75 MHz

OBFRQ : 134498.00 Hz

OBSET : 20

RGAIN : 16 times

SCANS : 16 times

SLVNT : CDCL3

SPINNING : 9 Hz

TEMP : 19.1 C

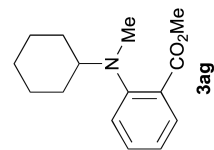



1H Line 070521-13-446-3-13C

Date : Mon Feb 12 01:43:45 2007  
 FileName : .LoadingFID.nmdata  
 Comment : 1H Line  
 SliceHistory :  
 EXMODE : bcm

POINT 32768 points  
 SAMP0 32768 points  
 FREQU 26881.7 Hz  
 FILTR 13450 Hz  
 DELAY 14.9 usec  
 DEADT 19.1 usec  
 INTVL 37.2 usec  
 TIMES 2000 times  
 DUMMY 4 times  
 PD 1.7810 sec  
 ACQTM 1218.9696 msec  
 PREDL 0.01000 msec  
 INIWT 1000.0000 msec  
 RESOL 0.82 Hz  
 PW1 6.50 usec  
 13C  
 OBNUC 99.45 MHz  
 OBFRQ 104750.00 Hz  
 OBSET 28  
 RGAIN 1H  
 TRNUC 395.75 MHz  
 IRFRQ 134498.00 Hz  
 IRSET 45.0 usec  
 IRRPW 0  
 IRRNS 0

SCANS : 8903 times  
 SLVNT : CDCL3  
 SPINNING 3 Hz  
 TEMP 19.9 C

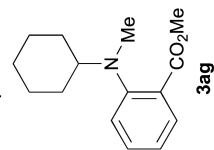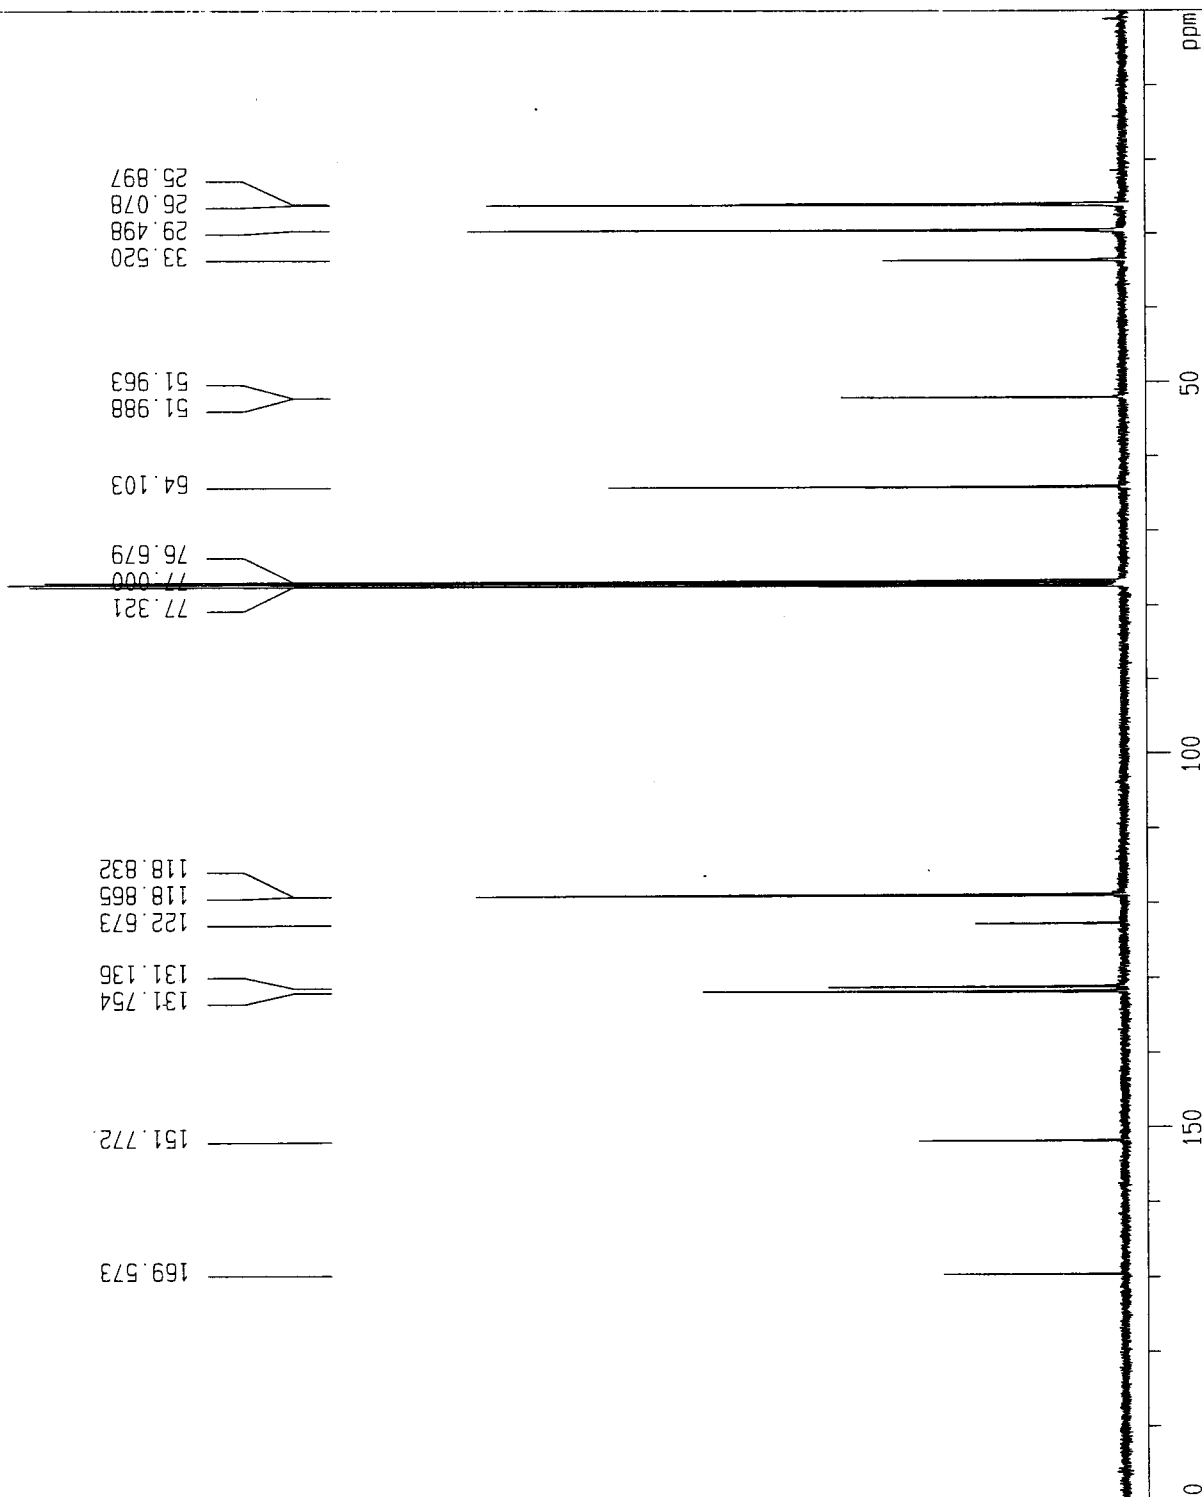

1H Line 070903-15-527-3

Date : Thu Aug 30 22:11:55 2007

File Name : LoadingFID.nmdata  
 Comment : 1H Line  
 Slice History :  
 EXMODE : non

POINT : 32768 points  
 SAMPD : 32768 points  
 FREQU : 7917.7 Hz  
 FILTR : 3950 Hz  
 DELAY : 50.6 usec  
 DEAT : 73.4 usec  
 INTVL : 126.3 usec  
 TIMES : 32 times  
 DUMMY : 1 times  
 PD : 2.8614 sec  
 ACQTM : 4138.5986 msec  
 PREDL : 0.01000 msec  
 INTWT : 1000.0000 msec  
 RESOL : 0.24 Hz  
 PW1 : 5.05 usec  
 OBNUC : 1H  
 OBFRQ : 395.75 MHz  
 OBSET : 134498.00 Hz  
 RGAIN : 19  
 SCANS : 32 times  
 SLVNT : CDCL3  
 SPINNING : 13 Hz  
 TEMP : 50.0 C

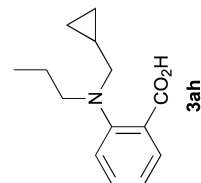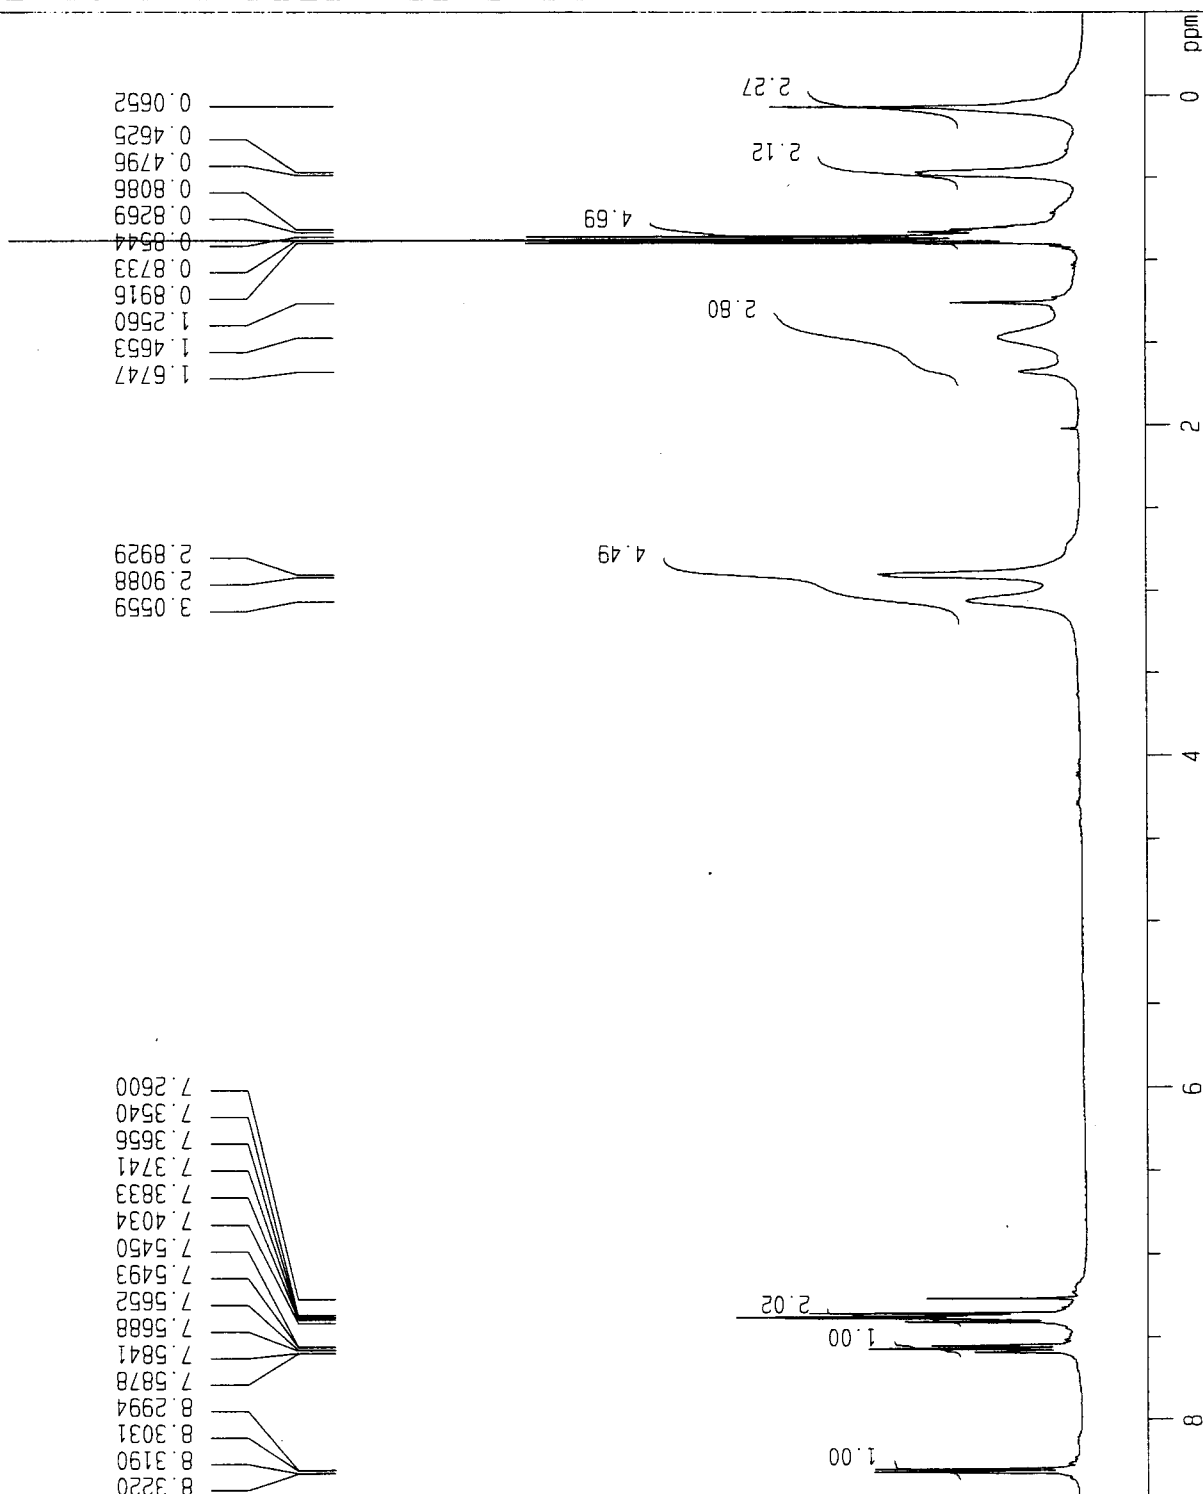

\_DEFAULT.ALS  
 Sat Sep 01 08:43:59 2007  
 13C  
 BCM  
 67.80 MHz  
 135.00 KHz  
 5200.00 Hz  
 32768  
 18306.64 Hz  
 10644  
 1.7900 sec  
 1.2100 sec  
 3.50 usec  
 1H  
 19.6 c  
 CDCL3  
 77.00 ppm  
 0.12 Hz  
 28

DFILE  
 COMNT  
 DATIM  
 OBNUC  
 EXMOD  
 OBFRQ  
 OBSET  
 OBFIN  
 POINT  
 FREQU  
 SCANS  
 ACQTM  
 PD  
 PW1  
 IRNUC  
 CTEMP  
 SLVNT  
 EXREF  
 BF  
 RGAIN

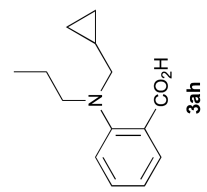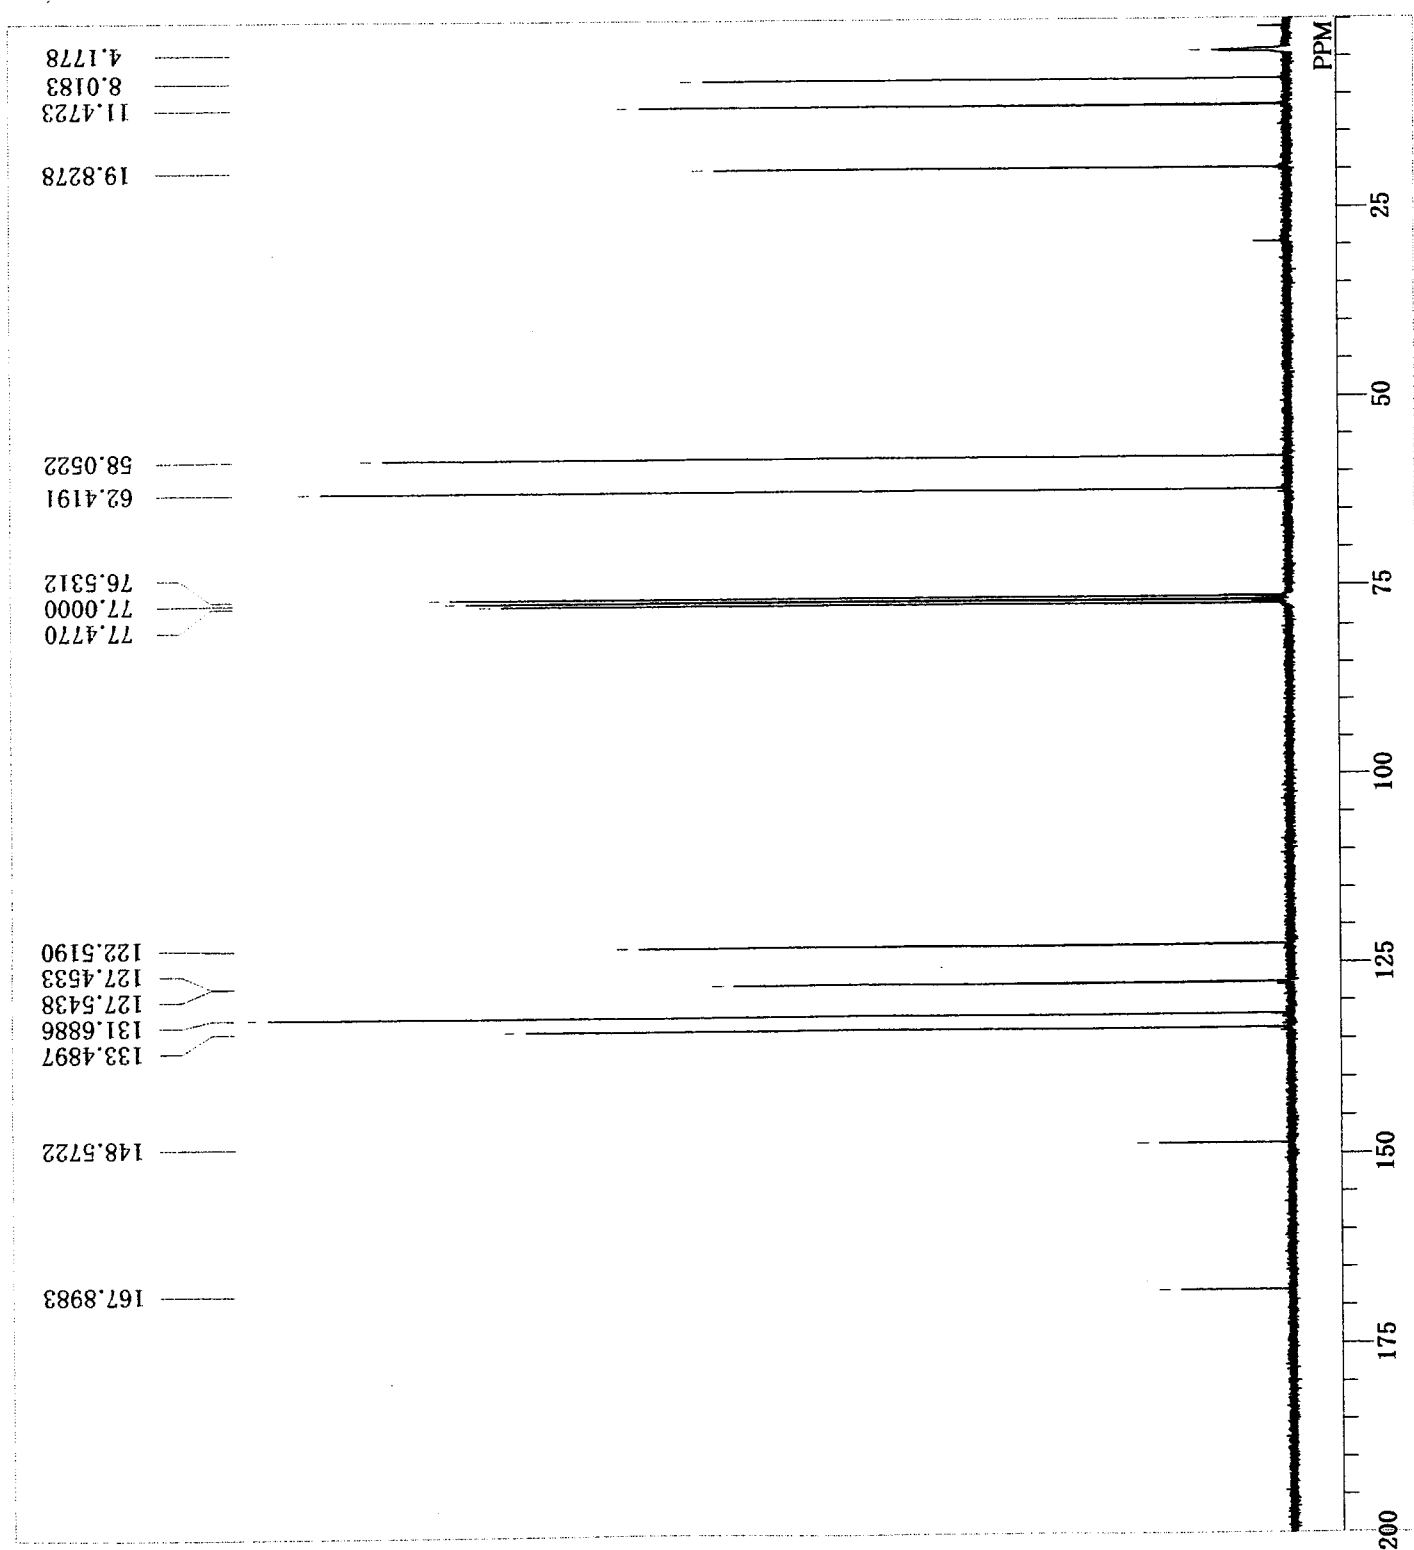

1H Line 070524-13-448-3

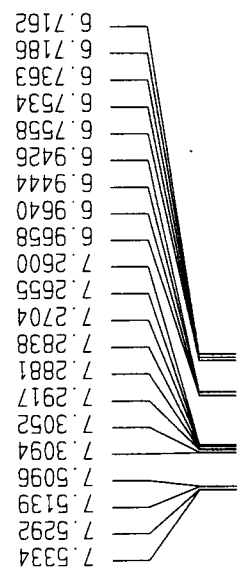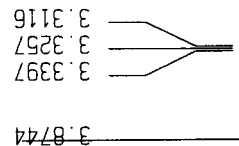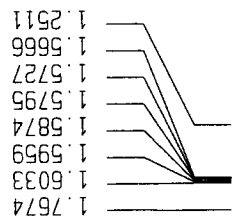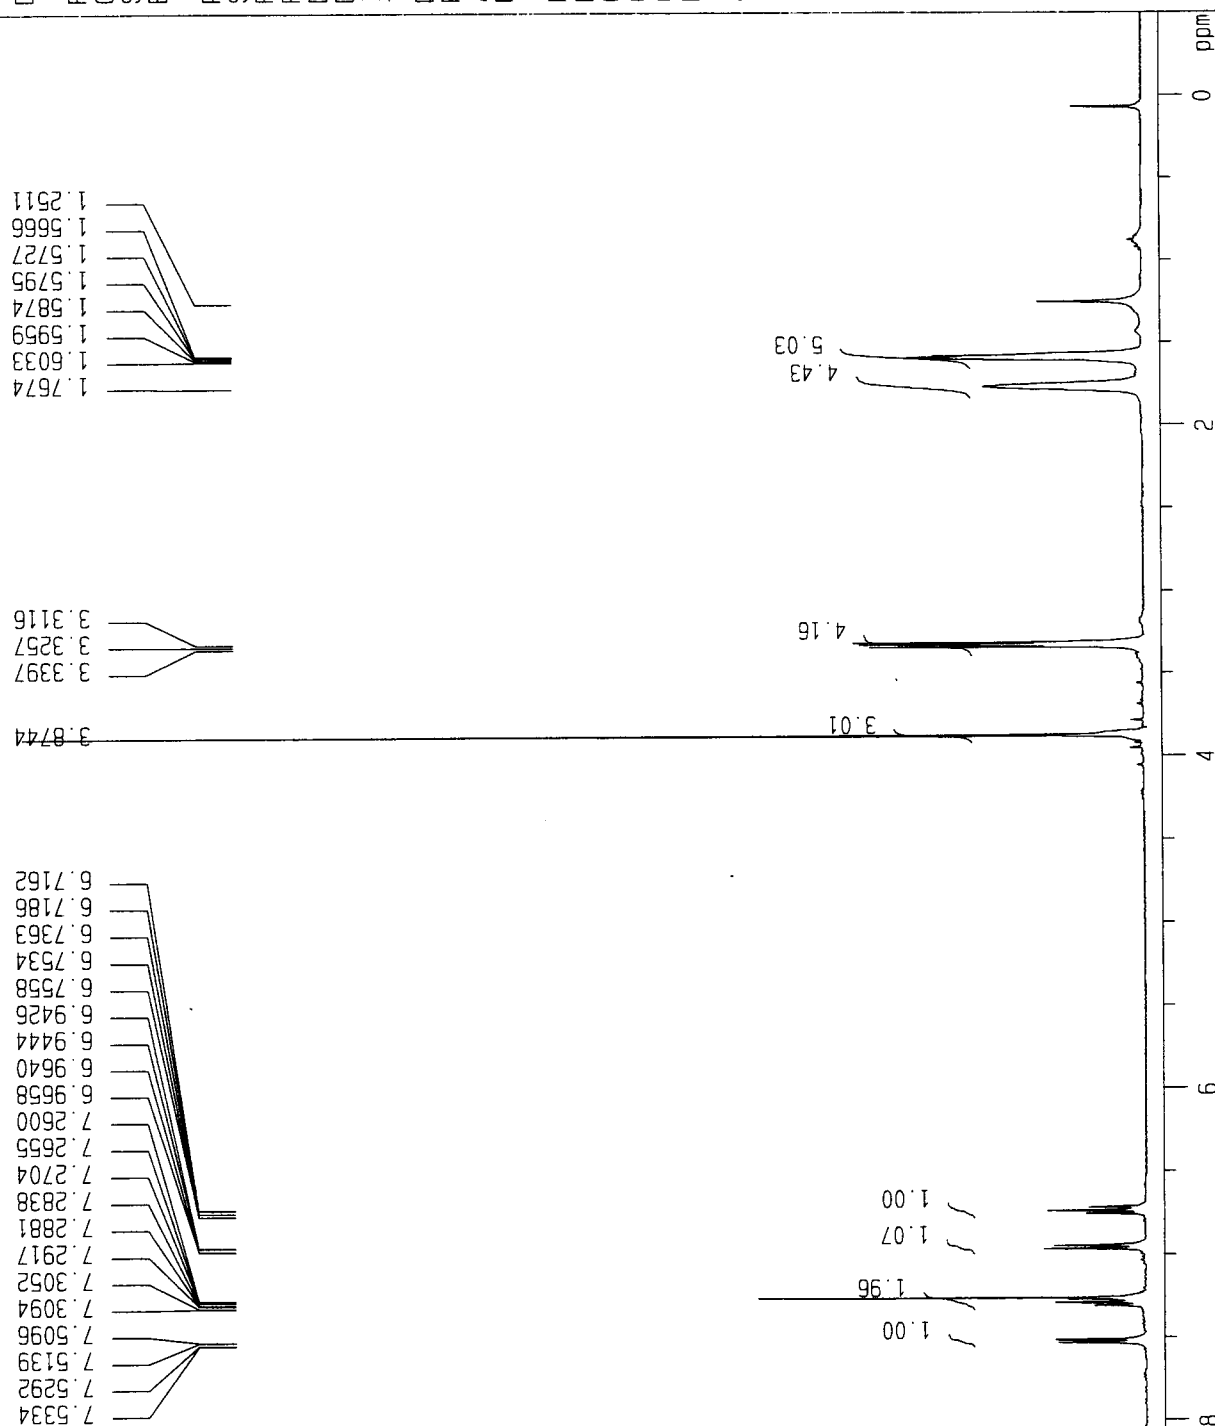

Date : Mon May 21 12:08:05 2007

File Name : .LoadingFID.nmdata

Comment : 1H Line

Slice History : non

EXMODE : non

POINT : 32768 points

SAMPO : 32768 points

FREQU : 7917.7 Hz

FILTR : 3950 Hz

DELAY : 50.6 usec

DEADT : 73.4 usec

INTVL : 126.3 usec

TIMES : 16 times

DUMMY : 1 times

PD : 2.8614 sec

ACQTM : 4138.5986 msec

PREDL : 0.01000 msec

INIWT : 1000.0000 msec

RESOL : 0.24 Hz

PW1 : 5.05 usec

OBNUC : 1H

OBFRQ : 395.75 MHz

OBSET : 134498.00 Hz

RGAIN : 23

SCANS : 16 times

SLVNT : CDCL3

SPINNING : 17 Hz

TEMP : 19.7 C

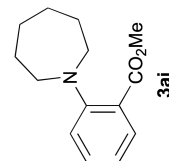

1H Line

070524-13-448-3-13C

Date : Mon Feb 12 01:43:45 2007

FileName : .LoadingFID.nmdata  
 Comment : 1H Line  
 SliceHistory :  
 EXMODE : bcm

POINT : 32768 points  
 SAMPO : 32768 points  
 FREQ : 26881.7 Hz  
 FILTR : 13450 Hz  
 DELAY : 14.9 usec  
 DEAT : 19.1 usec  
 INTVL : 37.2 usec  
 TIMES : 20000 times  
 DUMMY : 4 times  
 PD : 1.7810 sec  
 ACQTM : 1218.9696 msec  
 PREDL : 0.0100 msec  
 INIWT : 1000.0000 msec  
 RESOL : 0.82 Hz  
 PW1 : 6.50 usec  
 OBNUC : 13C  
 OBFRQ : 99.45 MHz  
 OBSET : 104750.00 Hz  
 RGAIN : 28  
 IRNUC : 1H  
 IRFRQ : 395.75 MHz  
 IRSET : 134498.00 Hz  
 IRRPW : 45.0 usec  
 IRRNS : 0

SCANS : 11370 times

SLVNT : CDCL3  
 SPINNING : 3 Hz  
 TEMP : 20.5 C

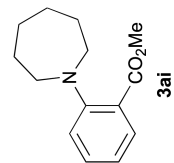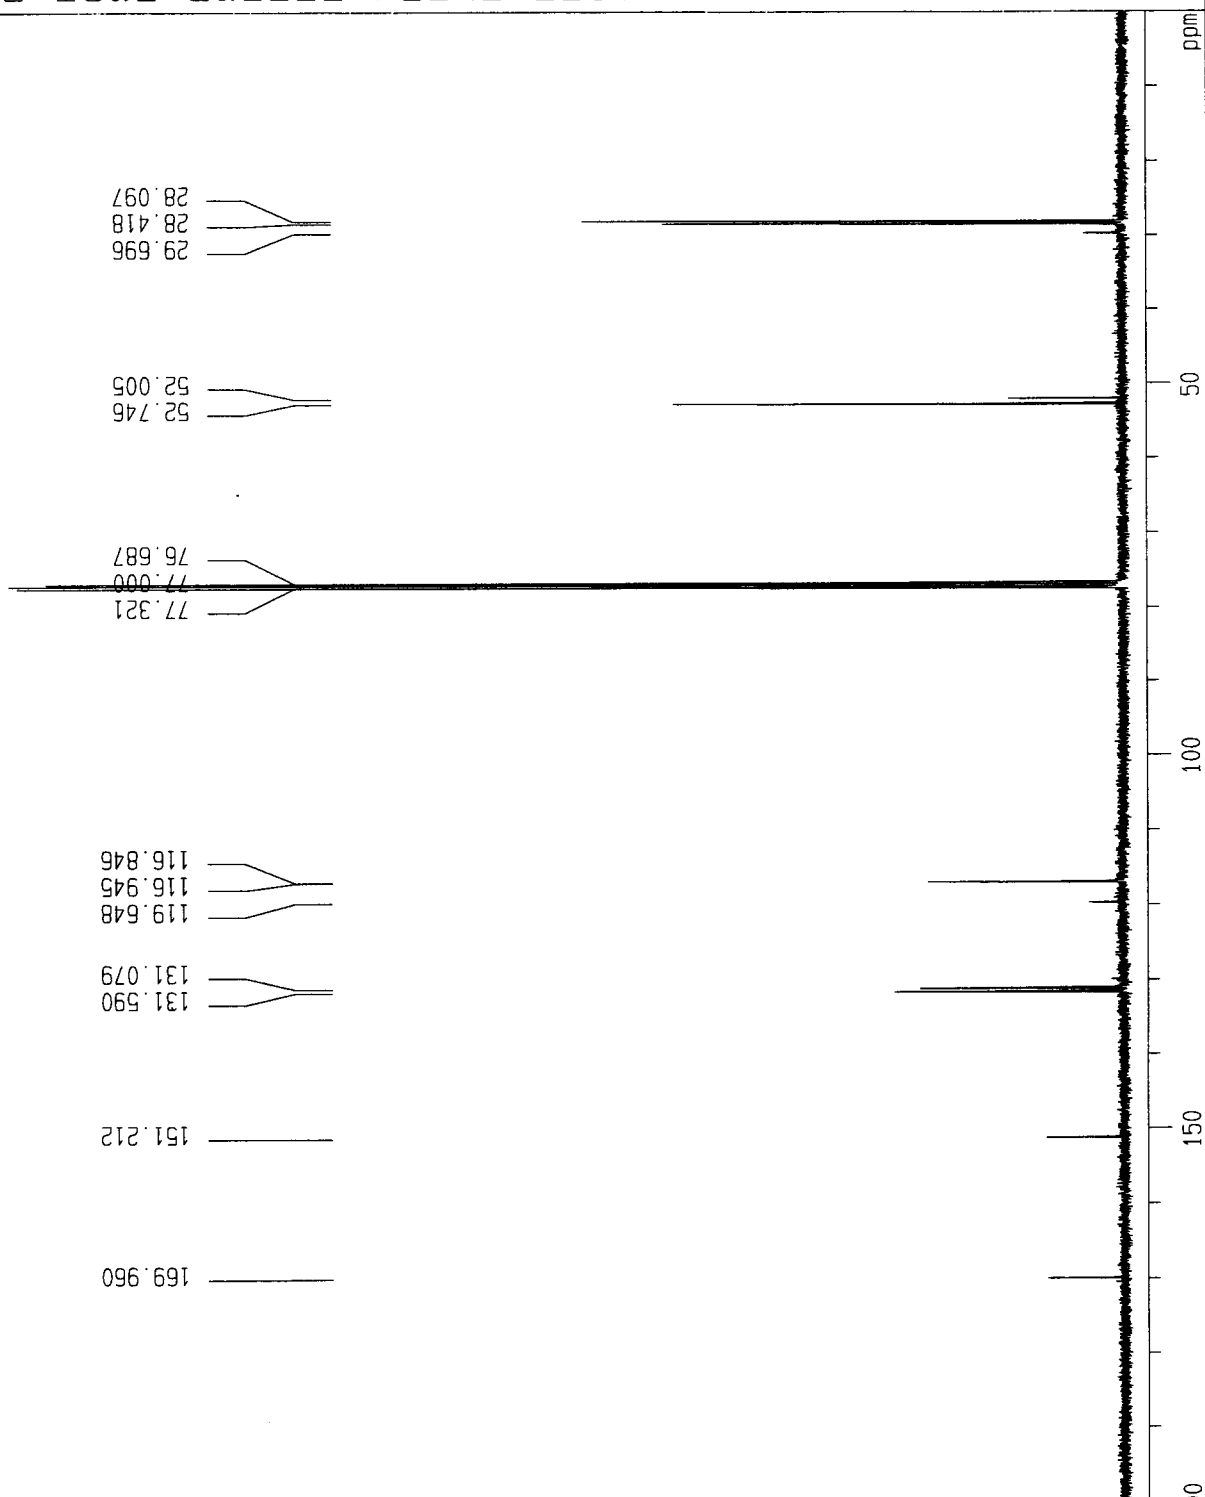

1H Line 070516-12-442-3

Date : Sun May 13 12:07:48 2007  
 File Name : LoadingFID.nmdata  
 Comment : 1H Line  
 SliceHistory : non  
 EXMODE :  
 POINT : 32768 points  
 SAMPO : 32768 points  
 FREQU : 7917.7 Hz  
 FILTR : 3950 Hz  
 DELAY : 50.6 usec  
 DEADT : 73.4 usec  
 INTVL : 126.3 usec  
 TIMES : 16 times  
 DUMMY : 1 times  
 PD : 2.8614 sec  
 ACQTM : 4138.5986 msec  
 PREDL : 0.01000 msec  
 INIWT : 1000.0000 msec  
 RESOL : 0.24 Hz  
 PW1 : 5.05 usec  
 OBNUC : 1H  
 OBFRQ : 395.75 MHz  
 OBSET : 134498.00 Hz  
 RGAIN : 21  
 SCANS : 16 times  
 SLVNT : CDCL3  
 SPINNING : 16 Hz  
 TEMP : 19.9 C

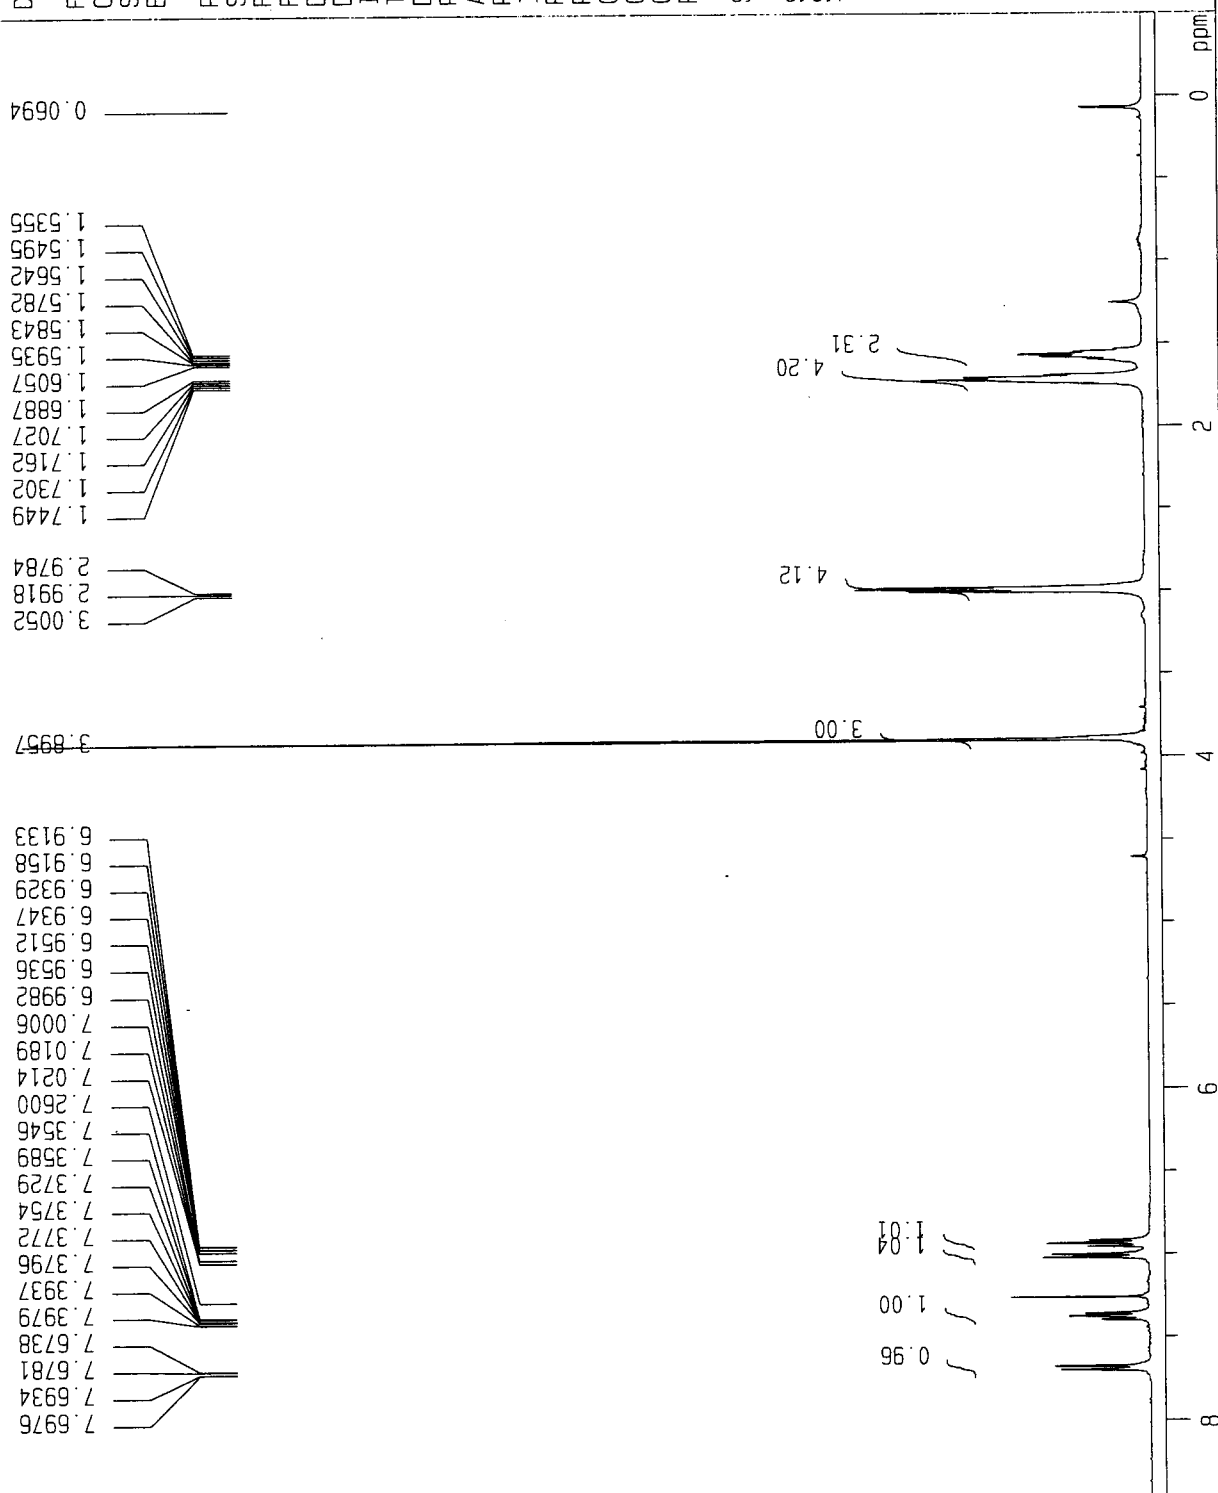

070516 -12-442-3-<sup>13</sup>C

1H Line

Date : Mon Feb 12 01:43:45 2007

File Name : LoadingFID.nmdata  
 Comment : 1H Line  
 Slice History :  
 EXMODE : bcm

POINT : 32768 points  
 SAMPO : 32768 points  
 FREQ : 26881.7 Hz  
 FILTR : 13450 Hz  
 DELAY : 14.9 usec  
 DEADT : 19.1 usec  
 INTVL : 37.2 usec  
 TIMES : 20000 times  
 DUMMY : 4 times  
 PD : 1.7810 sec  
 ACQTM : 1218.9696 msec  
 PREDL : 0.01000 msec  
 INIWT : 1000.0000 msec  
 RESOL : 0.82 Hz  
 PW1 : 6.50 usec  
 13C :  
 OBNUC : 13C  
 OBFRQ : 99.45 MHz  
 OBSET : 104750.00 Hz  
 RGAIN : 28  
 1H :  
 IRFRQ : 395.75 MHz  
 IRSET : 134498.00 Hz  
 IRRPW : 45.0 usec  
 IRRNS : 0

SCANS : 11584 times

SLVNT : CDCL3  
 SPINNING : 17 Hz  
 TEMP : 21.1 C

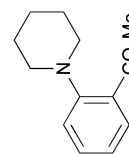

3aJ

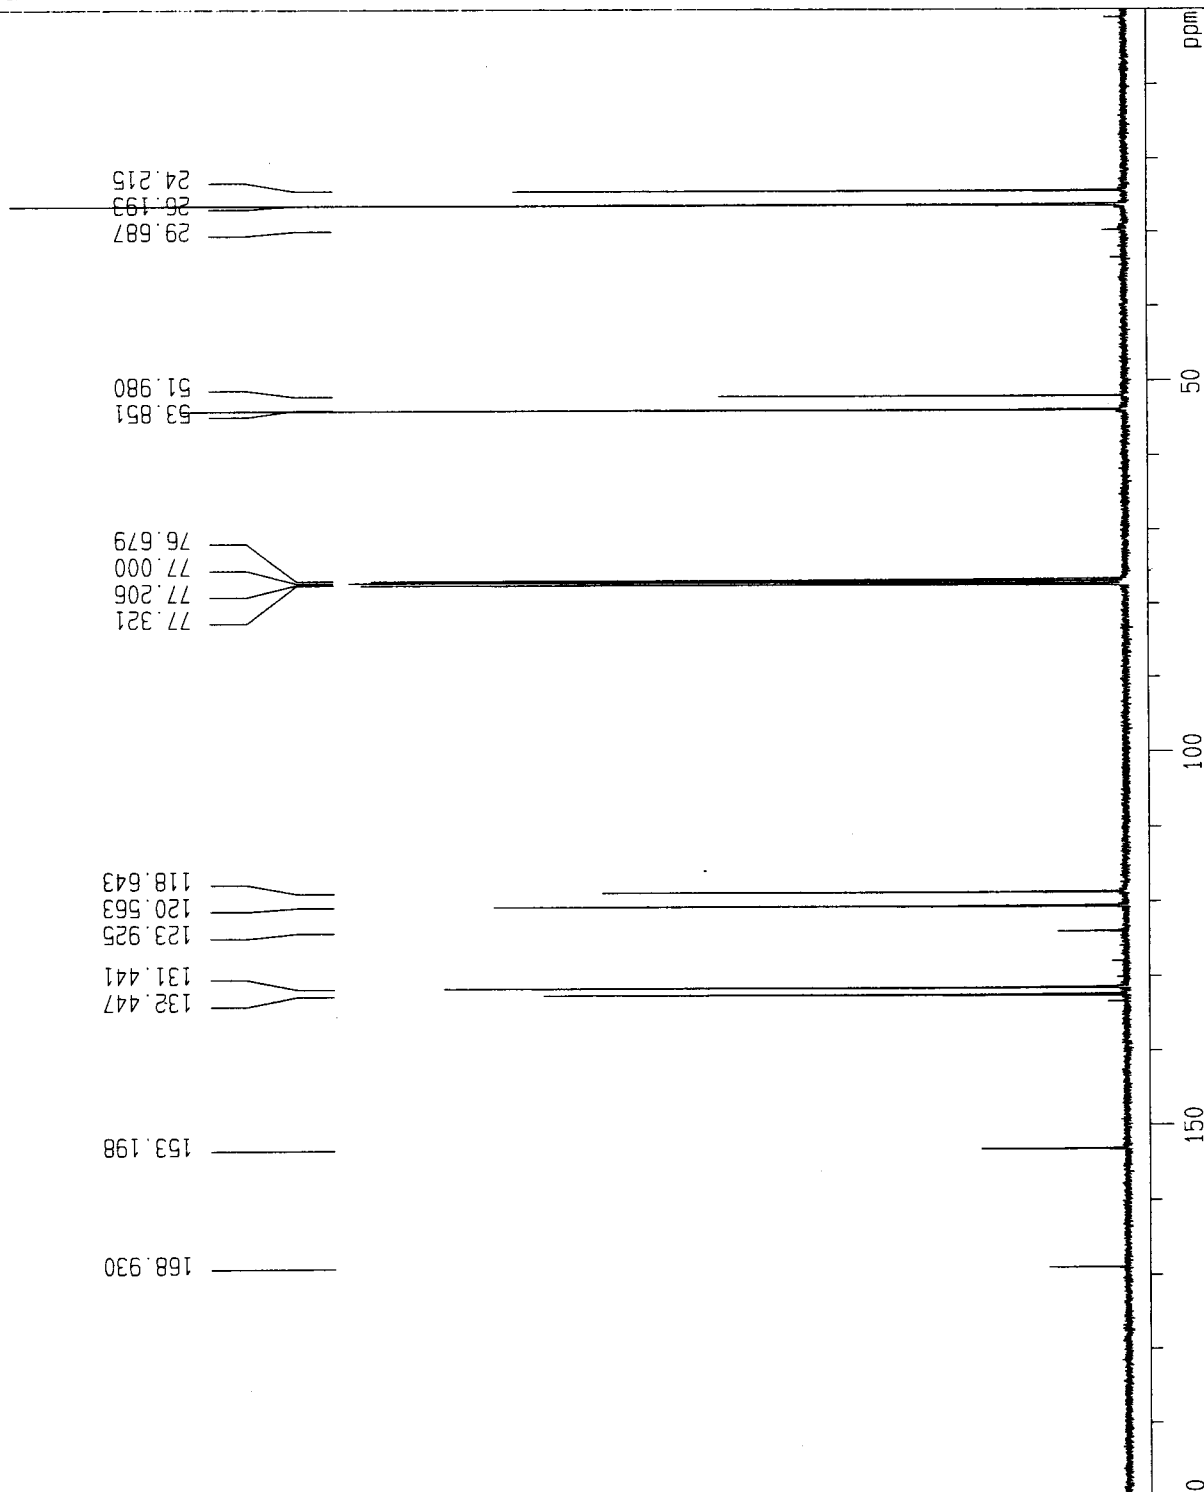

1H Line 070615-13-462-2

Date : Tue Jun 12 08:36:34 2007

File Name : LoadingFID.nmdata  
 Comment : 1H Line  
 SliceHistory : non  
 EXMODE :

POINT : 32768 points  
 SAMPD : 32768 points  
 FREQ : 7917.7 Hz  
 FILTR : 3950 Hz  
 DELAY : 50.6 usec  
 DEAT : 73.4 usec  
 INTVL : 126.3 usec  
 TIMES : 16 times  
 DUMMY : 1 times  
 PD : 2.8614 sec  
 ACQTM : 4138.5986 msec  
 PREDL : 0.01000 msec  
 INIWT : 1000.0000 msec  
 RESOL : 0.24 Hz  
 PW1 : 5.05 usec  
 1H :  
 OBNUC : 395.75 MHz  
 OBFRG : 134498.00 Hz  
 OBSEI : 24  
 RGAIN :  
 SCANS : 16 times  
 SLVNT : CDCL3  
 SPINNING : 21 Hz  
 TEMP : 20.4 C

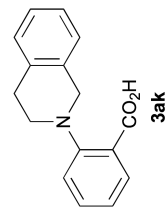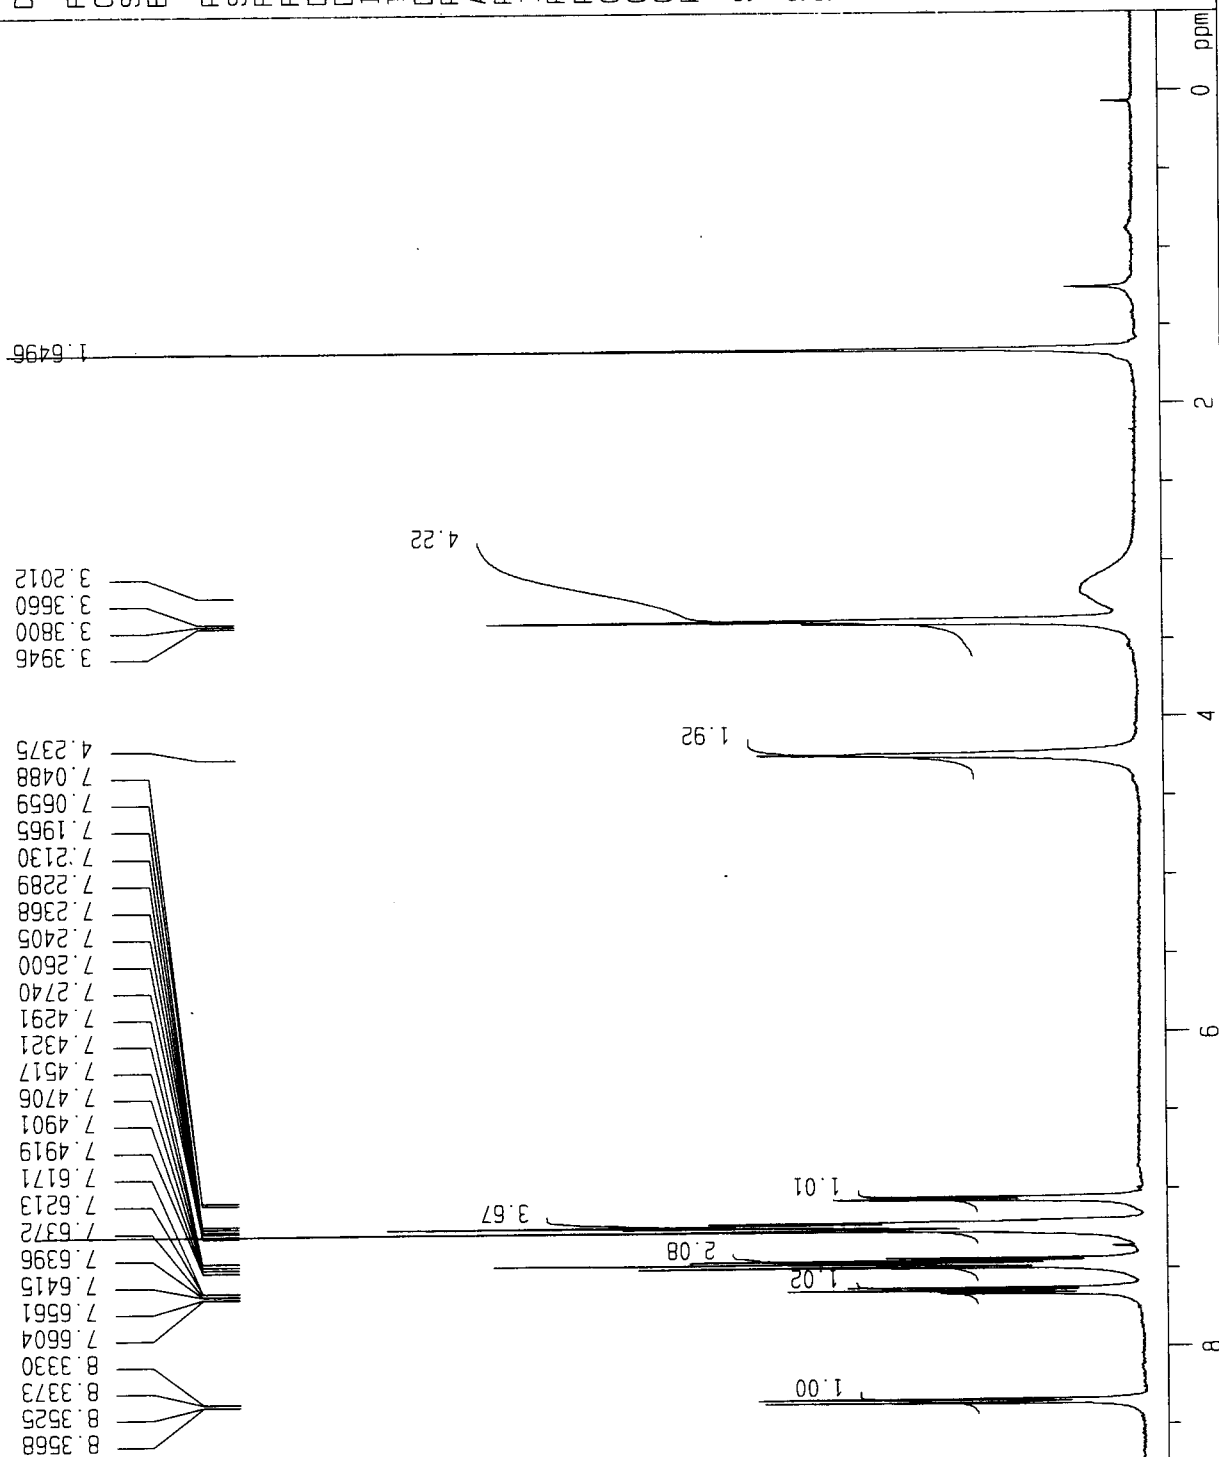



1H Line 090612-13-462-1-13C

Date : Sat Jun 9 21:51:08 2007  
 File Name : LoadingFID.nmdata  
 Comment : 1H Line  
 Slice History :  
 EXMODE : bcm  
 POINT : 32768 points  
 SAMP0 : 32768 points  
 FREQU : 26881.7 Hz  
 FILTR : 13450 Hz  
 DELAY : 14.9 usec  
 DEADT : 19.1 usec  
 INTVL : 37.2 usec  
 TIMES : 20000 times  
 DUMMY : 4 times  
 PD : 1.7810 sec  
 ACQTM : 1218.9696 msec  
 PREDL : 0.01000 msec  
 INTWT : 1000.0000 msec  
 RESOL : 0.82 Hz  
 PW1 : 6.50 usec  
 13C :  
 OBNUC : 99.45 MHz  
 OBFRQ : 104750.00 Hz  
 OBSET : 28  
 RGAIN : 1H  
 IRNUC : 395.75 MHz  
 IRFRQ : 134498.00 Hz  
 IRSET : 45.0 usec  
 IRRPW : 0  
 IRRNS :  
 SCANS : 12228 times  
 SLVNT : CDCL3  
 SPINNING : 16 Hz  
 TEMP : 21.0 C

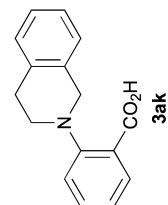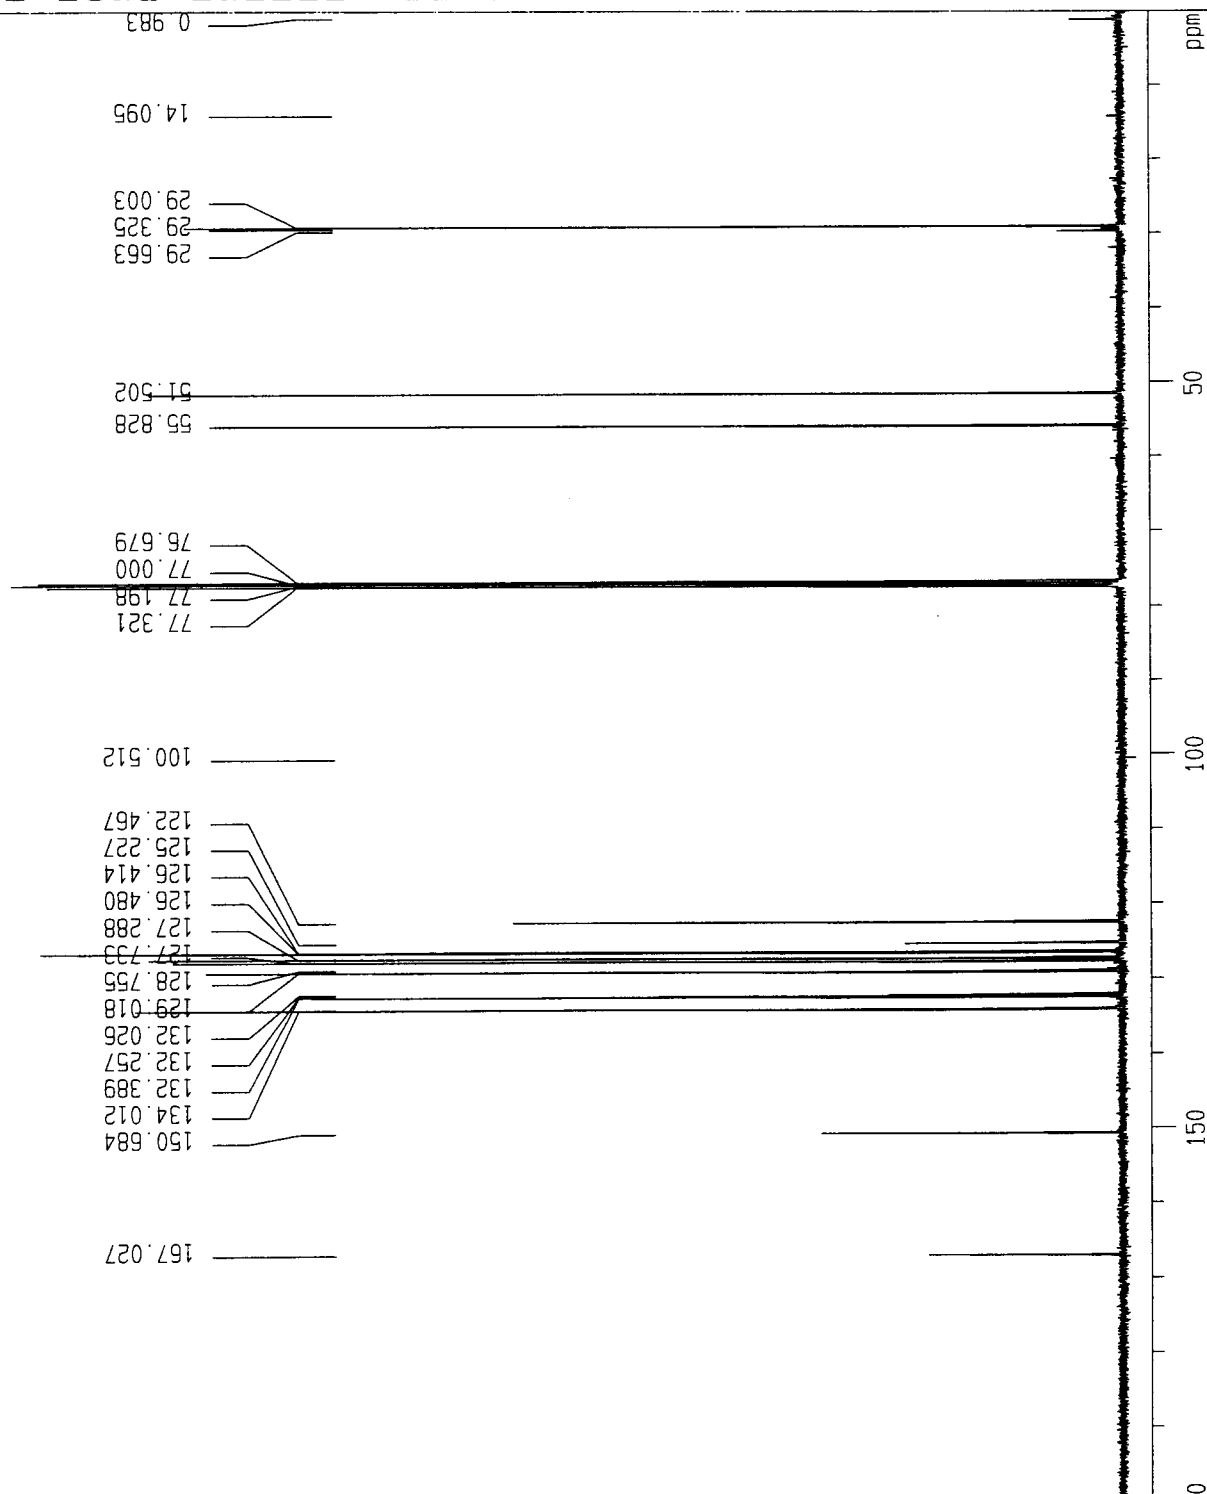

070619-13-865-1

1H Line

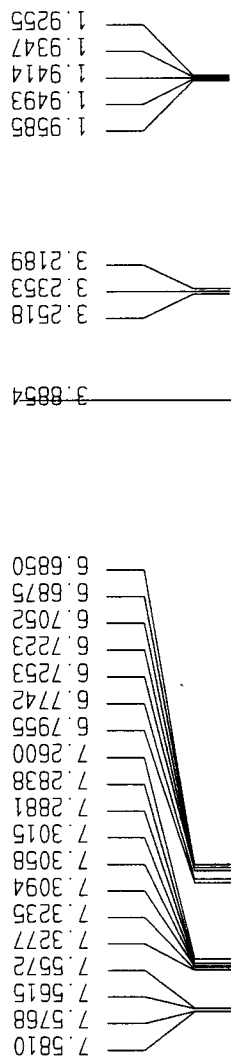

Date : Sat Jun 16 11:41:16 2007

File Name : .LoadingFID.nmdata

Comment : 1H Line

SliceHistory : non

EXMODE : non

POINT : 32768 points

SAMPO : 32768 points

FREQU : 7917.7 Hz

FILTR : 3950 Hz

DELAY : 50.6 usec

DEADT : 73.4 usec

INTVL : 126.3 usec

TIMES : 32 times

DUMMY : 1 times

PD : 2.8614 sec

ACQTM : 4138.5986 msec

PREDL : 0.01000 msec

INIWI : 1000.0000 msec

RESOL : 0.24 Hz

PW1 : 5.05 usec

OBNUC : 1H

OBFRQ : 395.75 MHz

OBSET : 134498.00 Hz

RGAIN : 25

SCANS : 32 times

SLVNT : CDCL3

SPINNING : 19 Hz

TEMP : 19.9 C

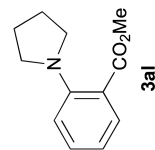

1H Line 070619-13-465-1-13C

Date : Mon Feb 12 01:43:45 2007

FileName : .LoadingFID.nmdata  
 Comment : 1H Line  
 SliceHistory :  
 EXMODE : bcm

POINT : 32768 points  
 SAMPO : 32768 points  
 FREQU : 26881.7 Hz  
 FILTR : 13450 Hz  
 DELAY : 14.9 usec  
 DEADT : 19.1 usec  
 INTVL : 37.2 usec  
 TIMES : 20000 times  
 DUMMY : 4 times  
 PD : 1.7810 sec  
 ACQTM : 1218.9696 msec  
 PREDL : 0.01000 msec  
 INIWT : 1000.0000 msec  
 RESOL : 0.82 Hz  
 PW1 : 6.50 usec  
 13C :  
 OBNUC : 99.45 MHz  
 OBFRQ : 104750.00 Hz  
 OBSET : 31  
 RGAIN :  
 1H : 395.75 MHz  
 IRFRQ : 134498.00 Hz  
 IRSET : 45.0 usec  
 IRRPW : 0  
 IRNS :  
 SCANS : 12046 times  
 SLVNT : CDCL3  
 SPINNING : 19 Hz  
 TEMP : 20.9 C

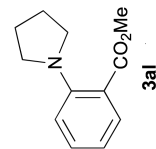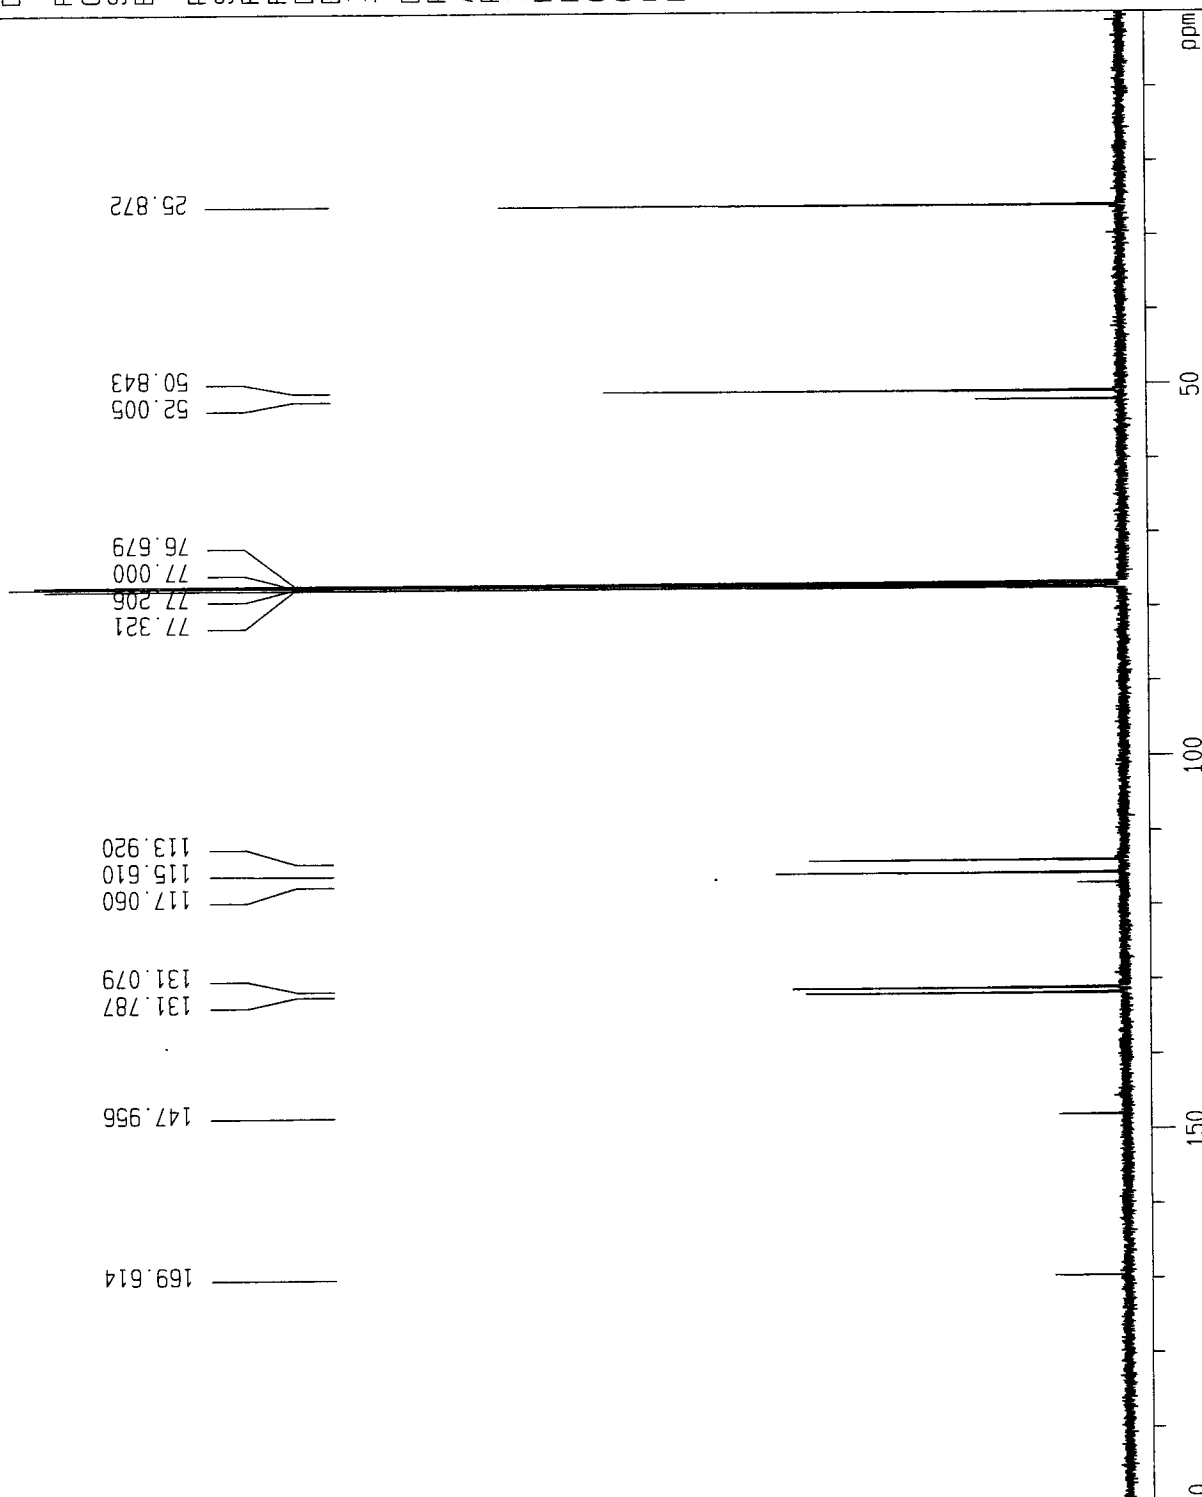

1H Line 070709-14-483-3

Date : Fri Jul 6 11:23:38 2007

FileName : .LoadingFID.nmdata  
 Comment : 1H Line  
 SliceHistory :  
 EXMODE : non

POINT 32768 points  
 SAMPO 32768 points  
 FREQU 7917.7 Hz  
 FILTR 3950 Hz  
 DELAY 50.6 usec  
 DEADT 73.4 usec  
 INTVL 126.3 usec  
 TIMES 16 times  
 DUMMY 1 times  
 PD 2.8614 sec  
 ACQTM 4138.5986 msec  
 PREDL 0.01000 msec  
 INIWT 1000.0000 msec  
 RESOL 0.24 Hz  
 PW1 5.05 usec  
 OBNUC 1H  
 OBFRQ 395.75 MHz  
 OBSET 134498.00 Hz  
 RGAIN 28

SCANS : 16 times

SLVNT : CDCL3  
 SPINNING 19 Hz  
 TEMP 20.1 C

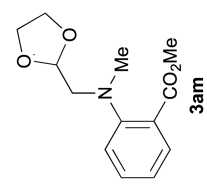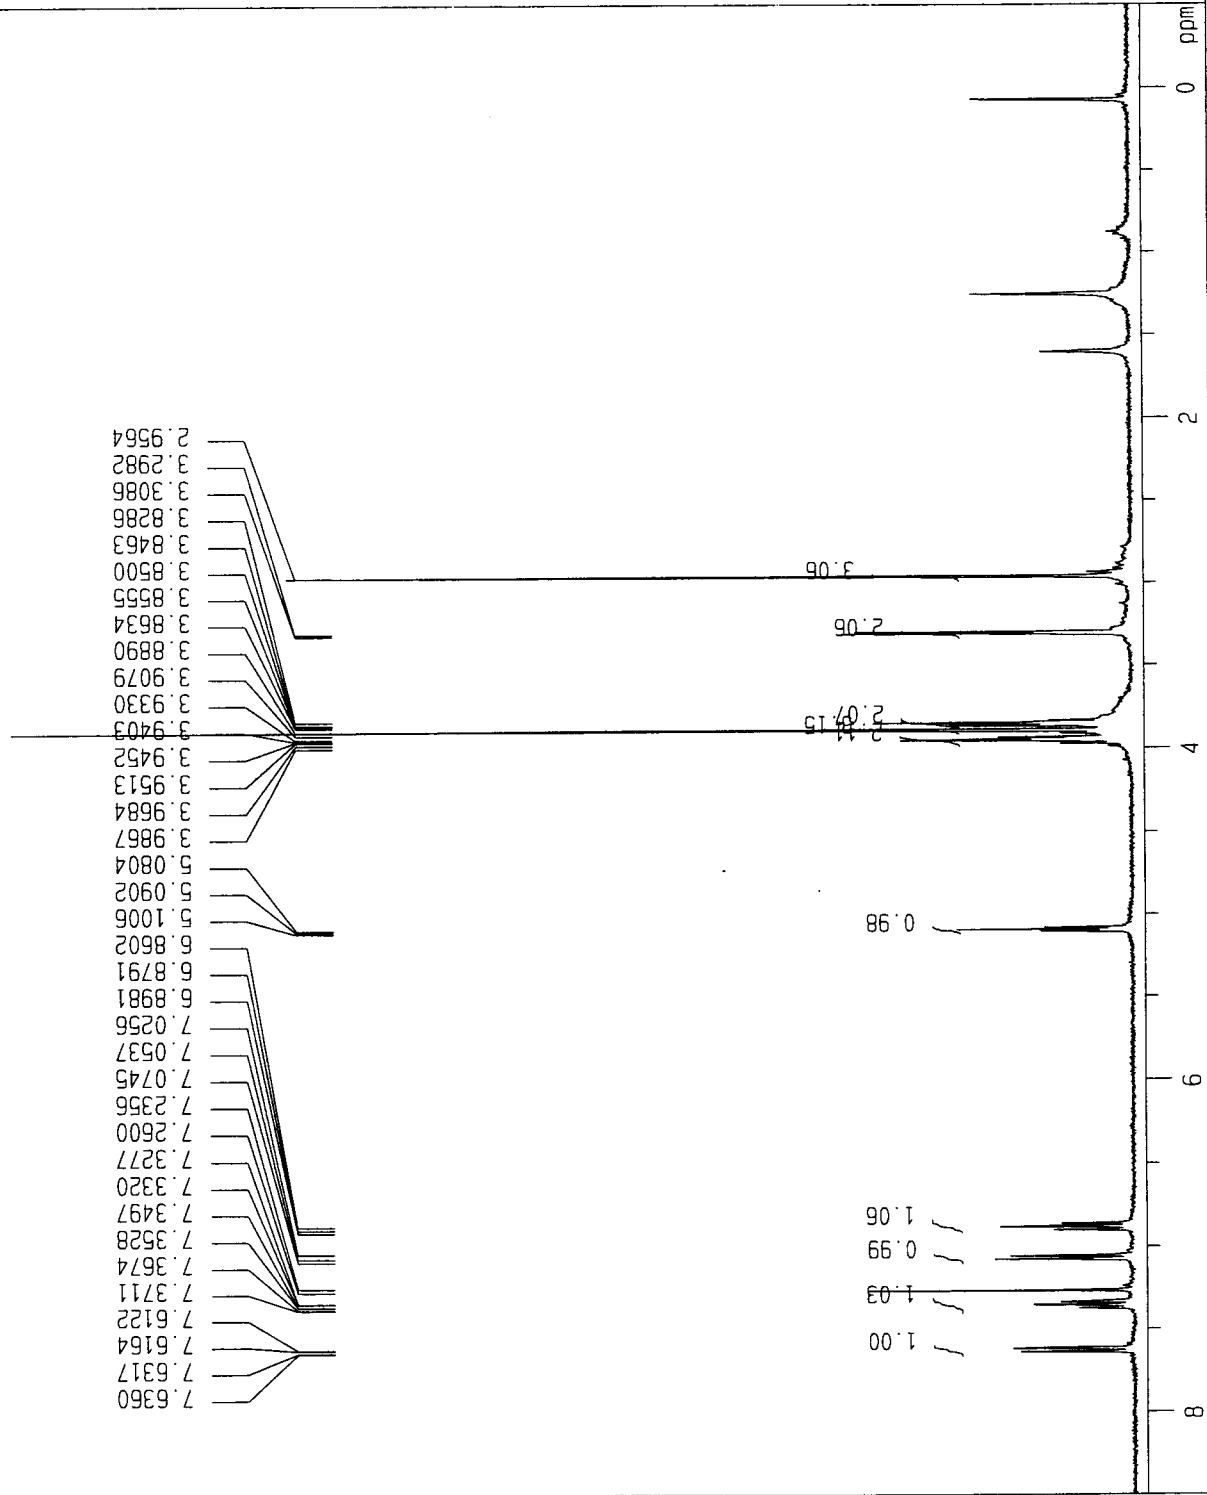

070710-14-483-3-<sup>13</sup>C

1H Line

Date : Mon Feb 12 01:43:45 2007

File Name : .LoadingFID.nmdata  
 Comment : 1H Line  
 Slice History :  
 EXMODE : bcm

POINT : 32768 points  
 SAMPD : 32768 points  
 FREQ : 26881.7 Hz  
 FILTR : 13450 Hz  
 DELAY : 14.9 usec  
 DEADT : 19.1 usec  
 INTVL : 37.2 usec  
 TIMES : 20000 times  
 DUMMY : 4 times  
 PD : 1.7810 sec  
 ACQTM : 1218.9696 msec  
 PREDL : 0.01000 msec  
 INIWT : 1000.0000 msec  
 RESOL : 0.82 Hz  
 PW1 : 6.50 usec  
 13C :  
 OBNUC : 13C  
 OBFRQ : 99.45 MHz  
 OBSET : 104750.00 Hz  
 RGAIN : 28  
 1H :  
 IRNUC : 1H  
 IRFRQ : 395.75 MHz  
 IRSET : 134498.00 Hz  
 IRRPW : 45.0 usec  
 IRRNS : 0

SCANS : 9659 times

SLVNT : CDCL3  
 SPINNING : 19 Hz  
 TEMP : 20.9 C

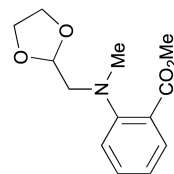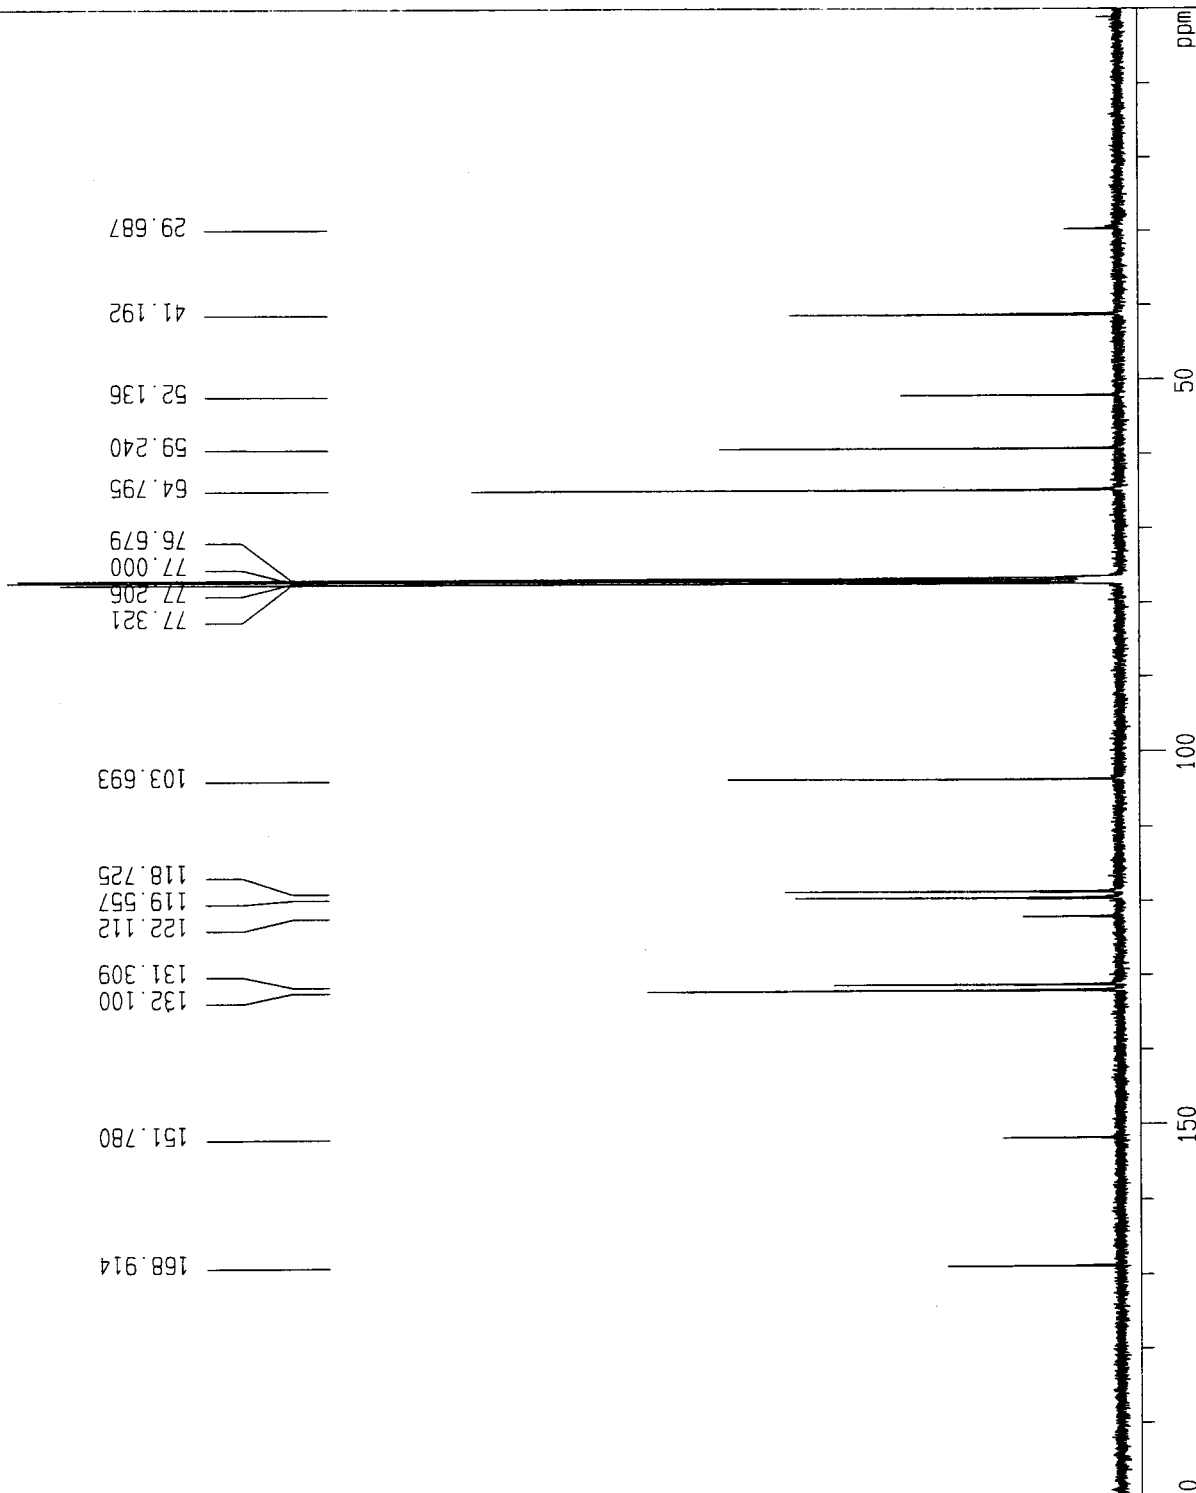

070929-15-549-2

1H Line

Date : Wed Sep 26 06:27:51 2007

FileName : .LoadingFID.nmdata  
 Comment : 1H Line  
 SliceHistory :  
 EXMODE : non

POINT 32768 points  
 SAMPO 32768 points  
 FREQ 7917.7 Hz  
 FILTR 3950 Hz  
 DELAY 50.6 usec  
 DEAT 73.4 usec  
 INTVL 126.3 usec  
 TIMES 16 times  
 DUMMY 1 times  
 PD 2.8614 sec  
 ACQTM 4138.5986 msec  
 PREDL 0.01000 msec  
 INIWT 1000.0000 msec  
 RESOL 0.24 Hz  
 PW1 5.05 usec  
 1H  
 OBNUC 395.75 MHz  
 OBFRQ 134498.00 Hz  
 OBSET 23  
 RGAIN  
 SCANS 16 times  
 SLVNT : CDCL3  
 SPINNING 16 Hz  
 TEMP 20.3 C

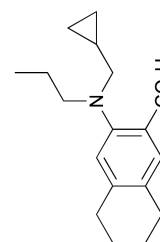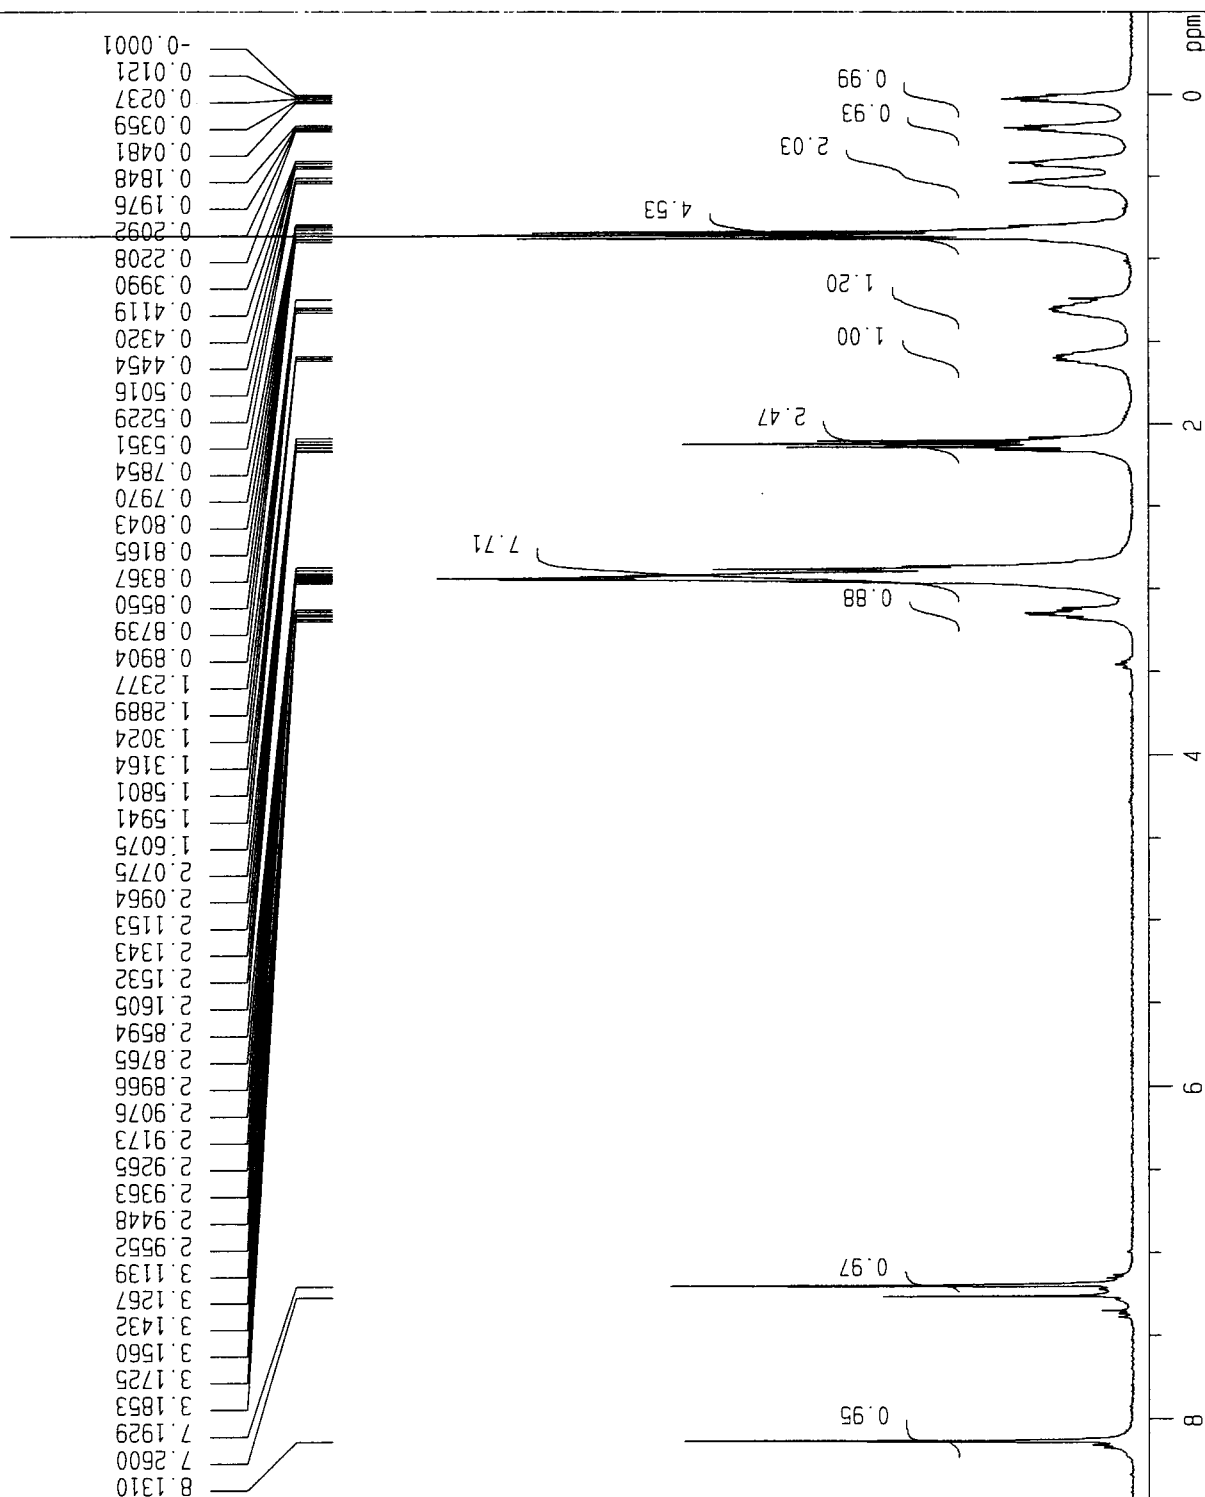

091002-15-549-2-13C

1H Line

Date : Mon Feb 12 01:43:45 2007

FileName : .LoadingFID.nmdata  
 Comment : 1H Line  
 SliceHistory :  
 EXMODE : bcm

POINT 32768 points  
 SAMPO 32768 points  
 FREQU 26881.7 Hz  
 FILTR 13450 Hz  
 DELAY 14.9 usec  
 DEADT 19.1 usec  
 INTVL 37.2 usec  
 TIMES 20000 times  
 DUMMY 4 times  
 PD 1.7810 sec  
 ACQTM 1218.9696 msec  
 PREDL 0.01000 msec  
 INIWT 1000.0000 msec  
 RESOL 0.82 Hz  
 PW1 6.50 usec  
 13C  
 OBNUC 99.45 MHz  
 OBFRQ 104750.00 Hz  
 OBSET 29  
 RGAIN 1H  
 IRNUC 395.75 MHz  
 IRFRQ 134498.00 Hz  
 IRSET 45.0 usec  
 IRRPW 0  
 IRRNS 0

SCANS : 1815 times  
 SLVNT : CDCL3  
 SPINNING 17 Hz  
 TEMP 21.6 C

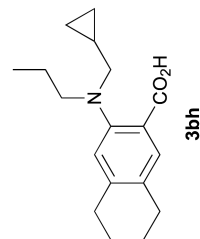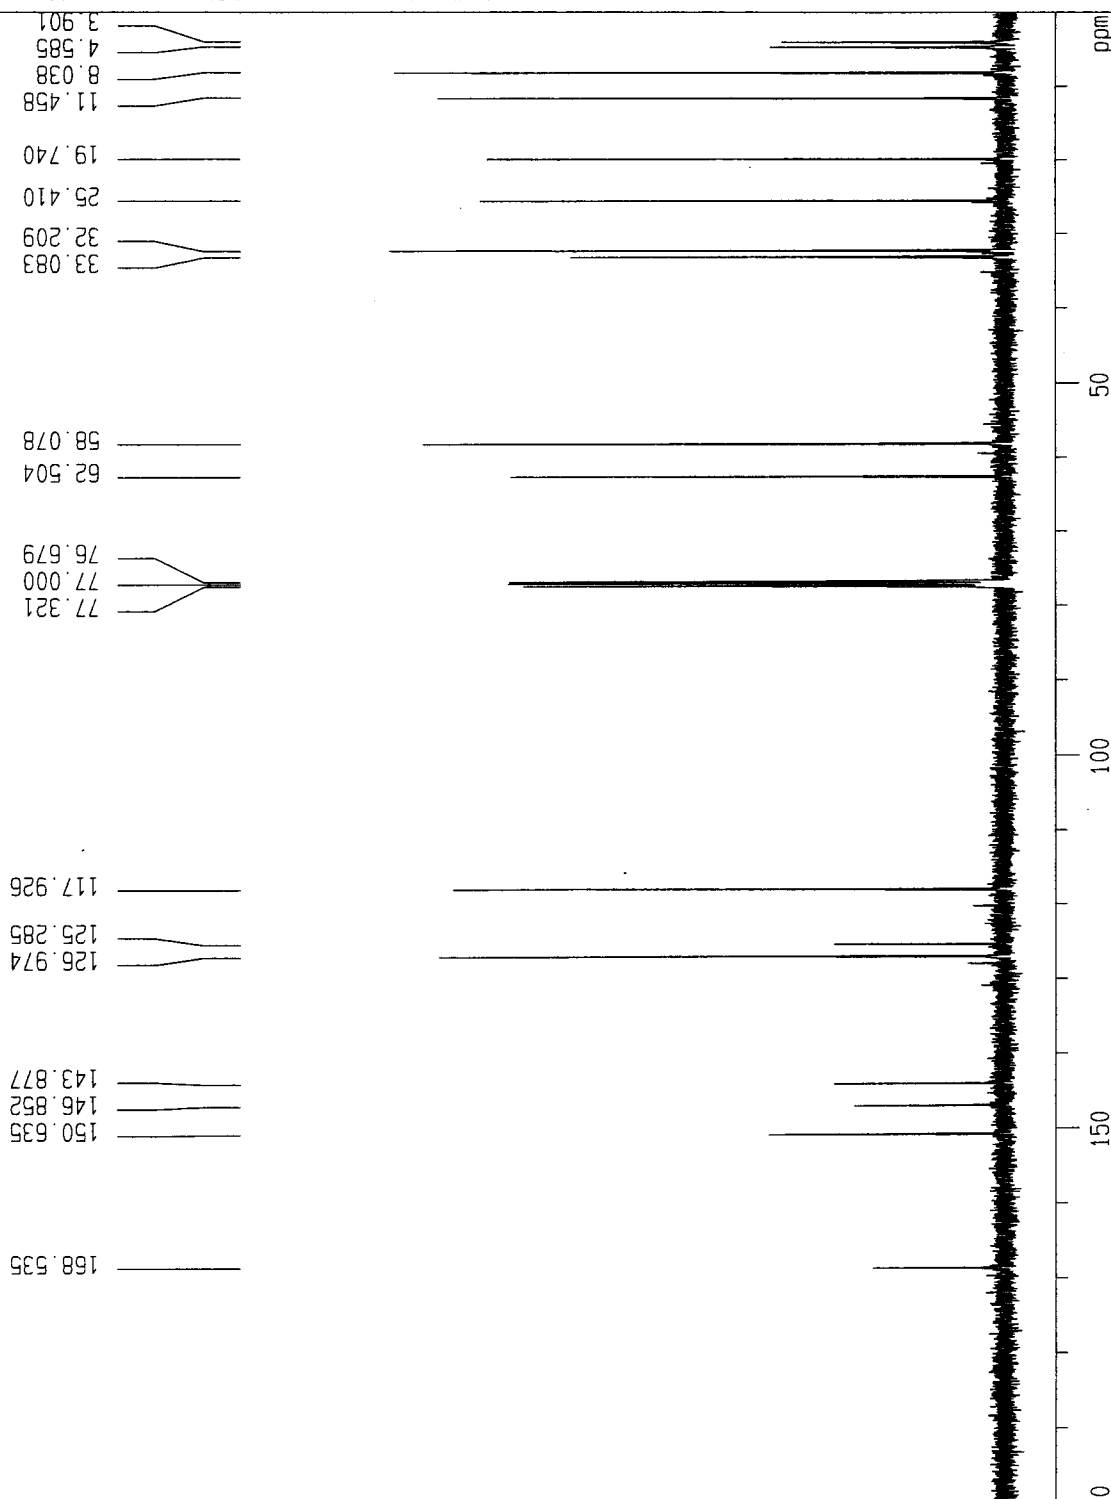

\_DEFAULT.ALS

Fri Sep 14 09:32:45 2007

1H

NON

270.05 MHz

112.00 KHz

5800.00 Hz

16384

5401.76 Hz

16

3.0331 sec

3.9670 sec

5.40 usec

1H

17.7 c

CDCL<sub>3</sub>

7.26 ppm

0.12 Hz

15

DFILE COMNT  
DATIM DATIM  
OBNUC OBNUC  
EXMOD EXMOD  
OBFRQ OBFRQ  
OBSET OBSET  
OBFIN OBFIN  
POINT POINT  
FREQU FREQU  
SCANS SCANS  
ACQTM ACQTM  
PD PD  
PW1 PW1  
IRNUC IRNUC  
CTEMP CTEMP  
SLVNT SLVNT  
EXREF EXREF  
BF BF  
RGAIN RGAIN

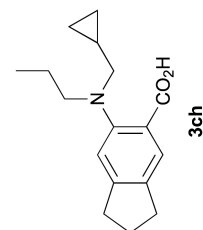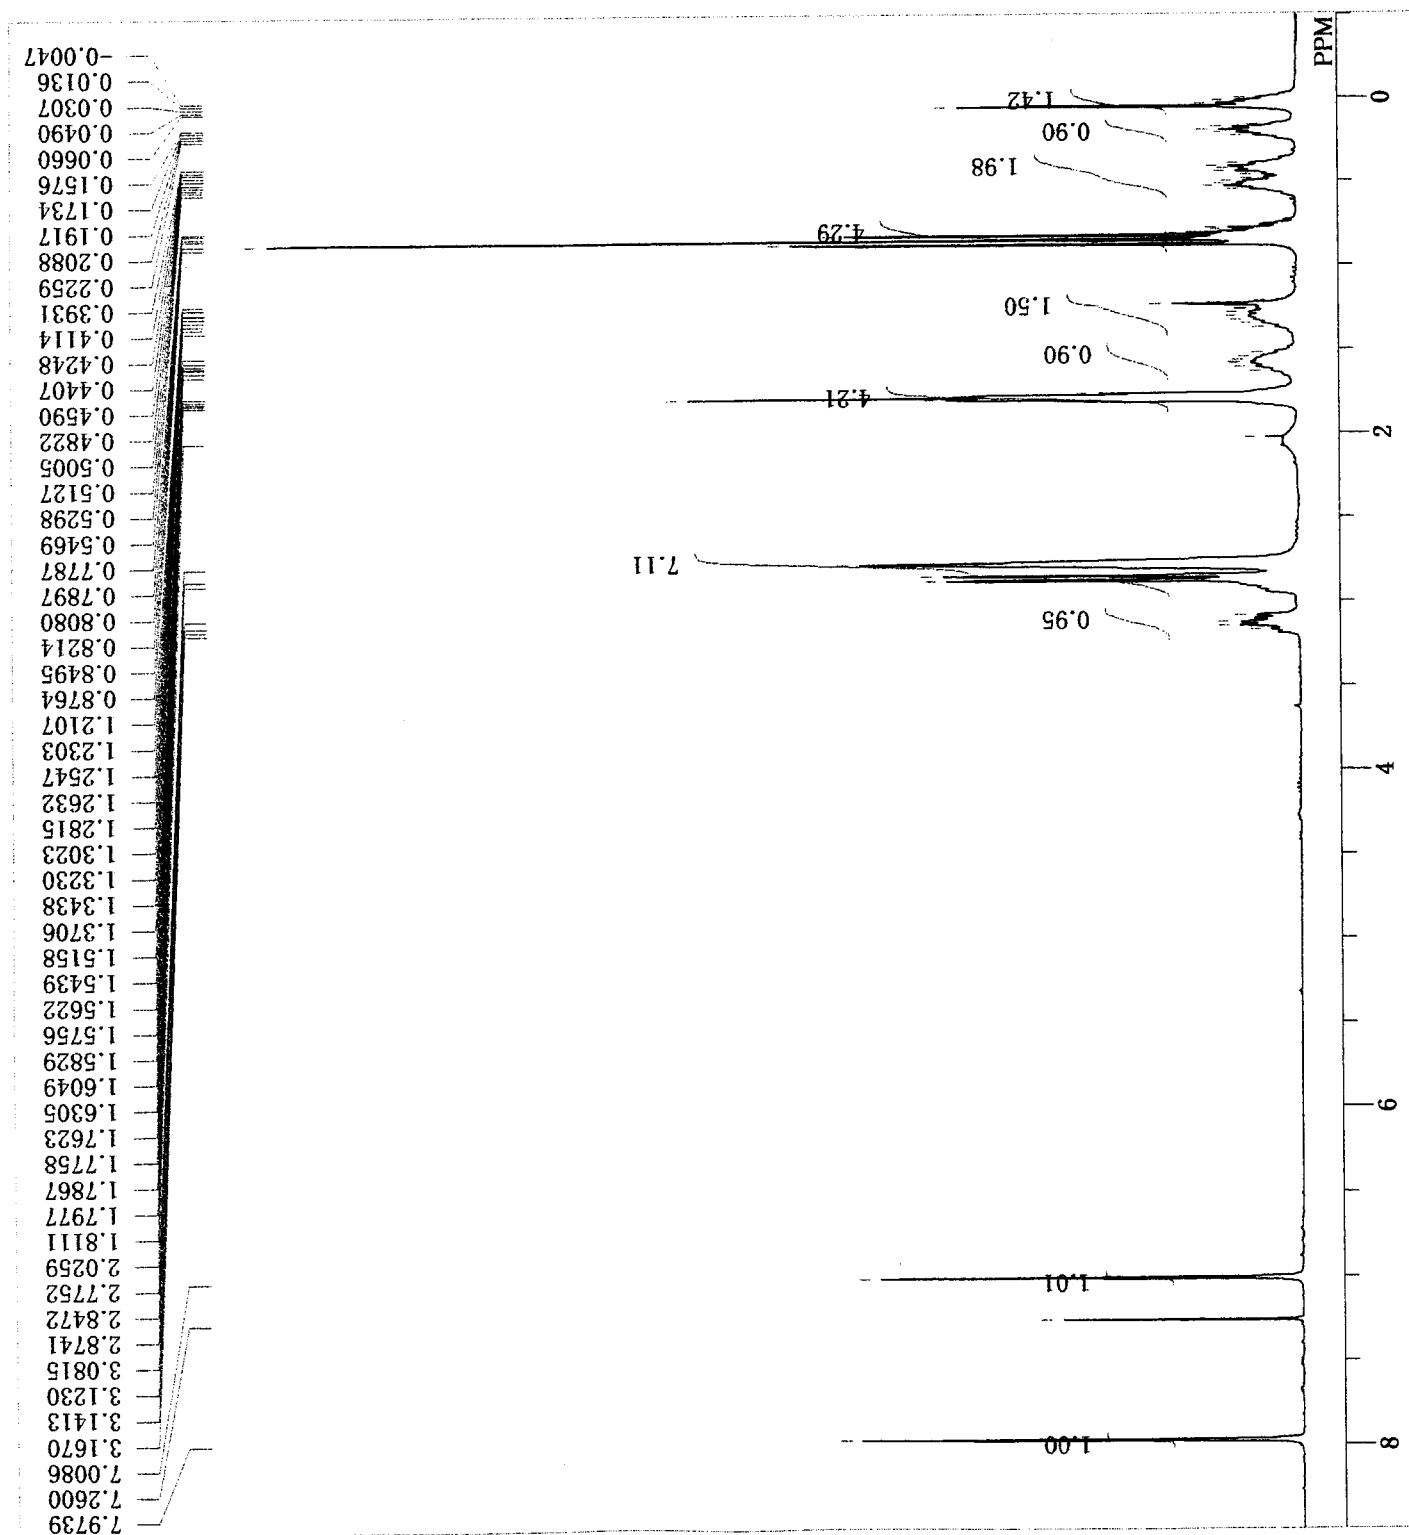



1H Line 070911-15-529-2-13C

Date : Sat Sep 8 22:21:41 2007

FileName : .LoadingFID.nmdata  
 Comment : 1H Line  
 SliceHistory :  
 EXMODE : bcm

POINT : 32768 points  
 SAMP0 : 32768 points  
 FREQ0 : 26881.7 Hz  
 FILTR : 13450 Hz  
 DELAY : 14.9 usec  
 DEADT : 19.1 usec  
 INTVL : 37.2 usec  
 TIMES : 20000 times  
 DUMMY : 4 times  
 PD : 1.7810 sec  
 ACGTM : 1218.9696 msec  
 PREDL : 0.01000 msec  
 INIWT : 1000.0000 msec  
 RESOL : 0.82 Hz  
 PW1 : 6.50 usec  
 13C :  
 OBNUC : 99.45 MHz  
 OBFRQ : 104750.00 Hz  
 OBSET : 28  
 RGAIN :  
 IRNUC : 1H  
 IRFRQ : 395.75 MHz  
 IRSET : 134498.00 Hz  
 IRRPW : 45.0 usec  
 IRRNS : 0

SCANS : 2352 times  
 SLVNT : CDCL3  
 SPINNING : 18 Hz  
 TEMP : 21.0 C

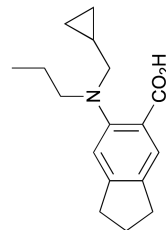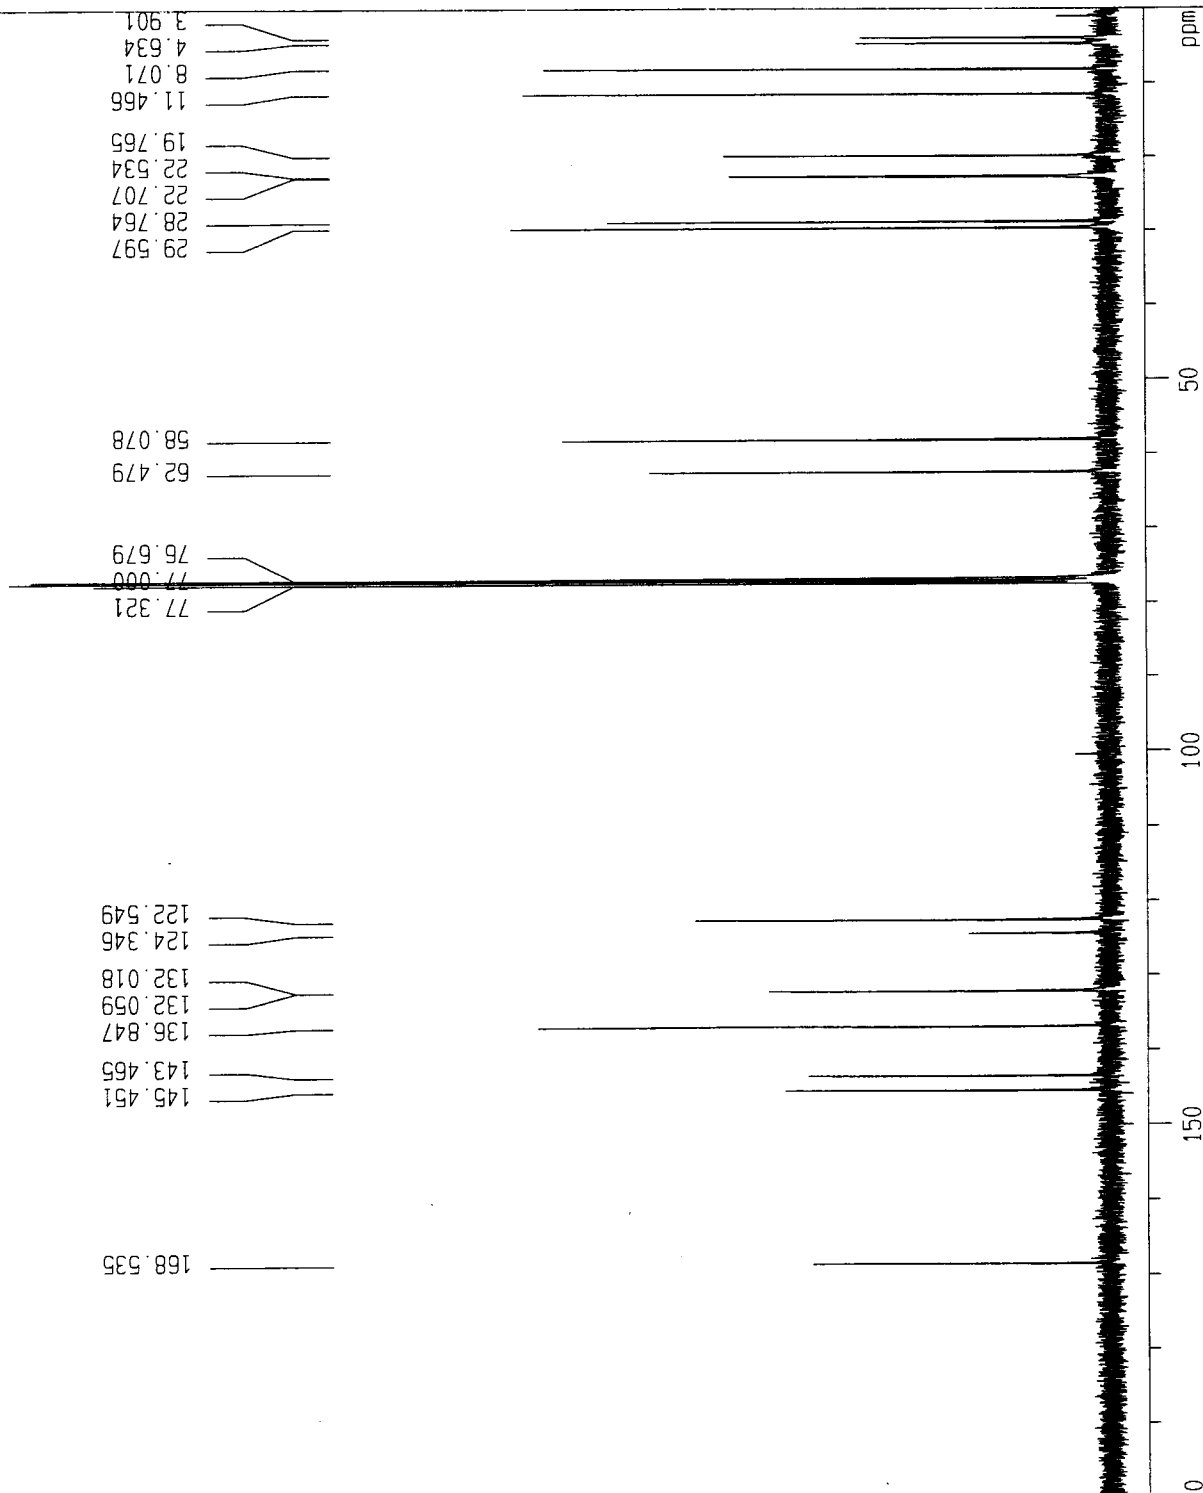

\_DEFAULT.ALS  
 Mon Sep 10 14:07:43 2007  
 1H  
 NON  
 270.05 MHz  
 112.00 KHz  
 5800.00 Hz  
 16384  
 5401.76 Hz  
 16  
 3.0331 sec  
 3.9670 sec  
 5.40 usec  
 1H  
 17.7 c  
 CDCL3  
 7.26 ppm  
 0.12 Hz  
 17

DFILE  
 COMNT  
 DATIM  
 OBNUC  
 EXMOD  
 OBFRQ  
 OBSET  
 OBFIN  
 POINT  
 FREQU  
 SCANS  
 ACQTM  
 PD  
 PW1  
 IRNUC  
 CTEMP  
 SLVNT  
 EXREF  
 BF  
 RGAIN

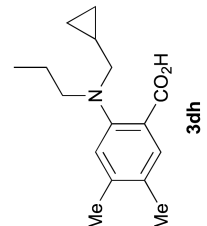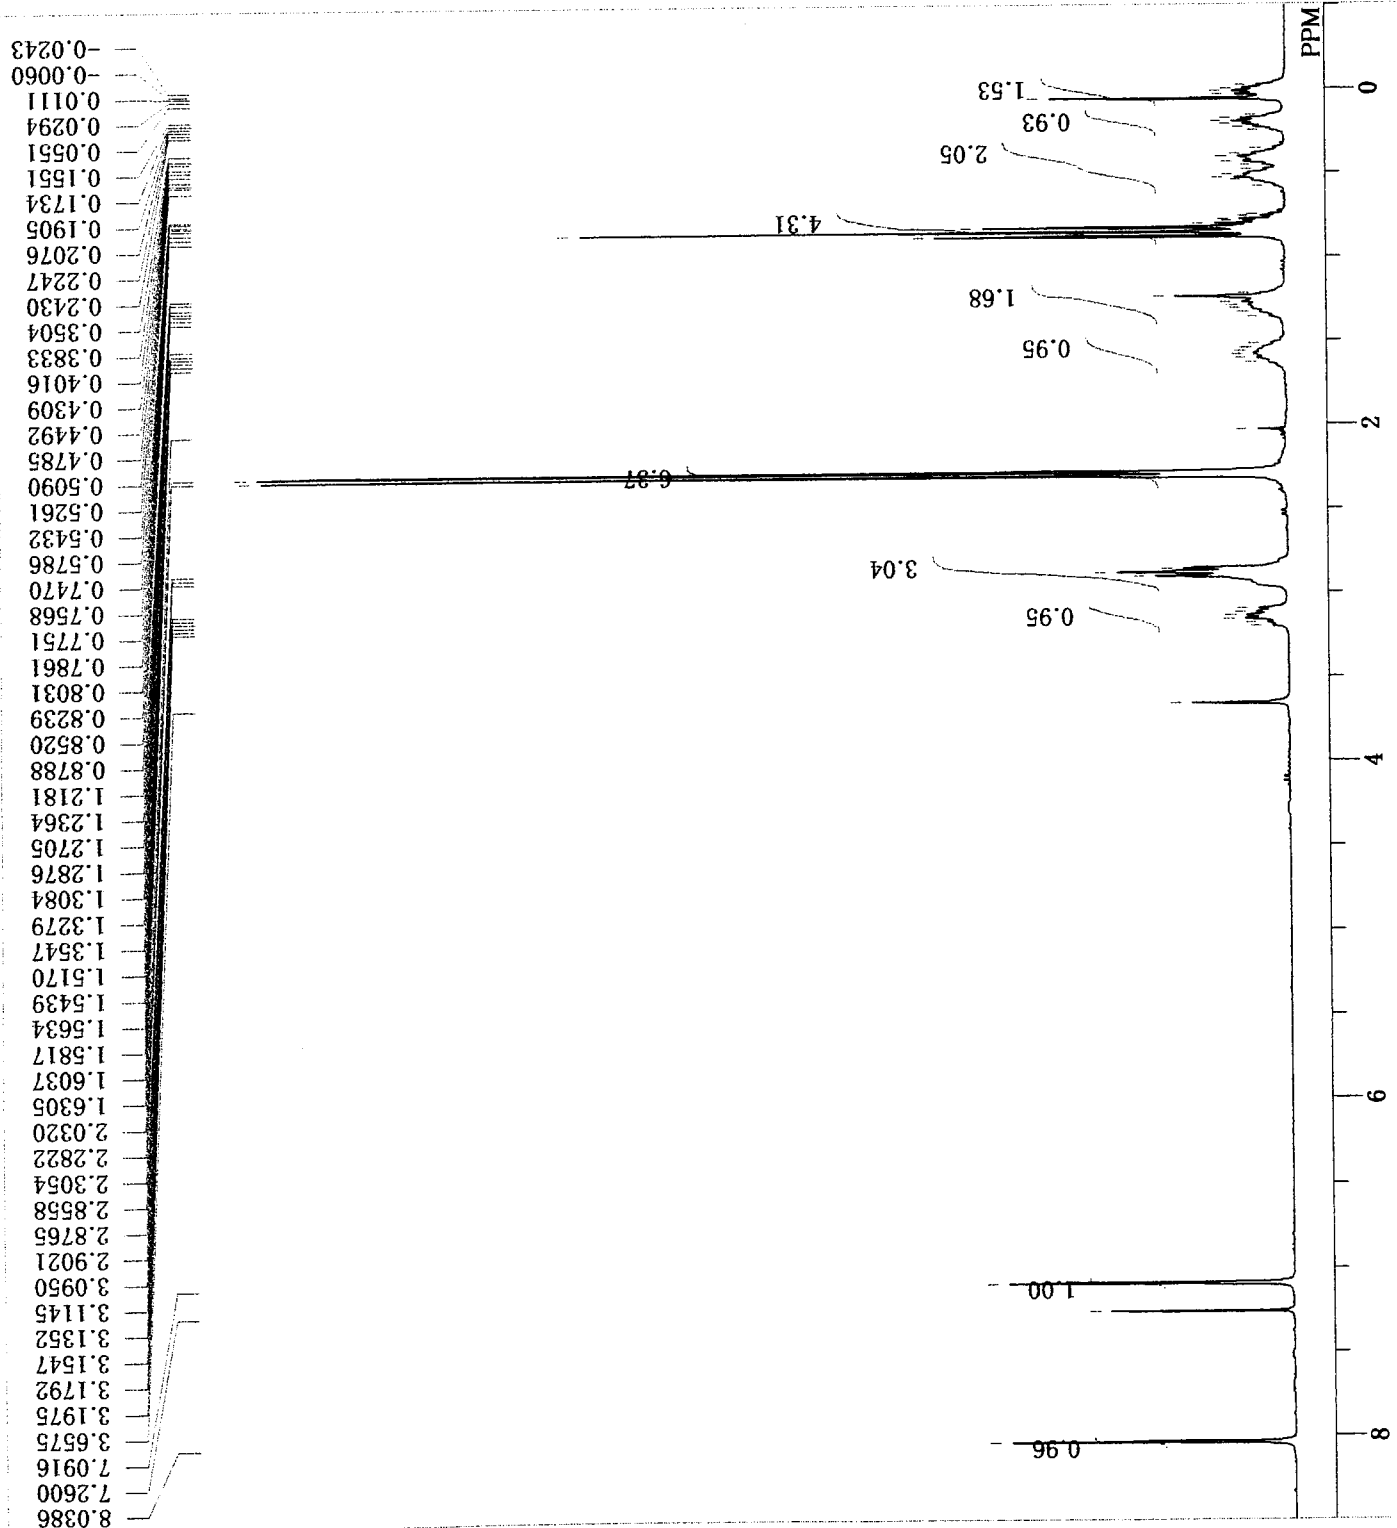

070911-15-528-2-13C

1H Line

Date : Sat Sep 8 20:19:43 2007

FileName : .LoadingFID.nmdata  
 Comment : 1H Line  
 SliceHistory :  
 EXMODE : bcm

POINT 32768 points  
 SAMPO 32768 points  
 FREQ 26881.7 Hz  
 FILTR 13450 Hz  
 DELAY 14.9 usec  
 DEAT 19.1 usec  
 INTVL 37.2 usec  
 TIMES 20000 times  
 DUMMY 4 times  
 PD 1.7810 sec  
 ACQTM 1218.9696 msec  
 PREDL 0.01000 msec  
 INIWT 1000.0000 msec  
 RESOL 0.82 Hz  
 PW1 6.50 usec  
 OBNUC 13C  
 OBFRQ 99.45 MHz  
 OBSET 104750.00 Hz  
 RGAIN 28  
 IRNUC 1H  
 IRFRQ 395.75 MHz  
 IRSET 134498.00 Hz  
 IRRPW 45.0 usec  
 IRRNS 0

SCANS : 10329 times

SLVNT : CDCL3  
 SPINNING 17 Hz  
 TEMP 20.8 C

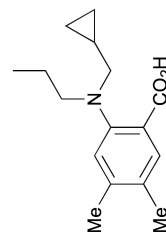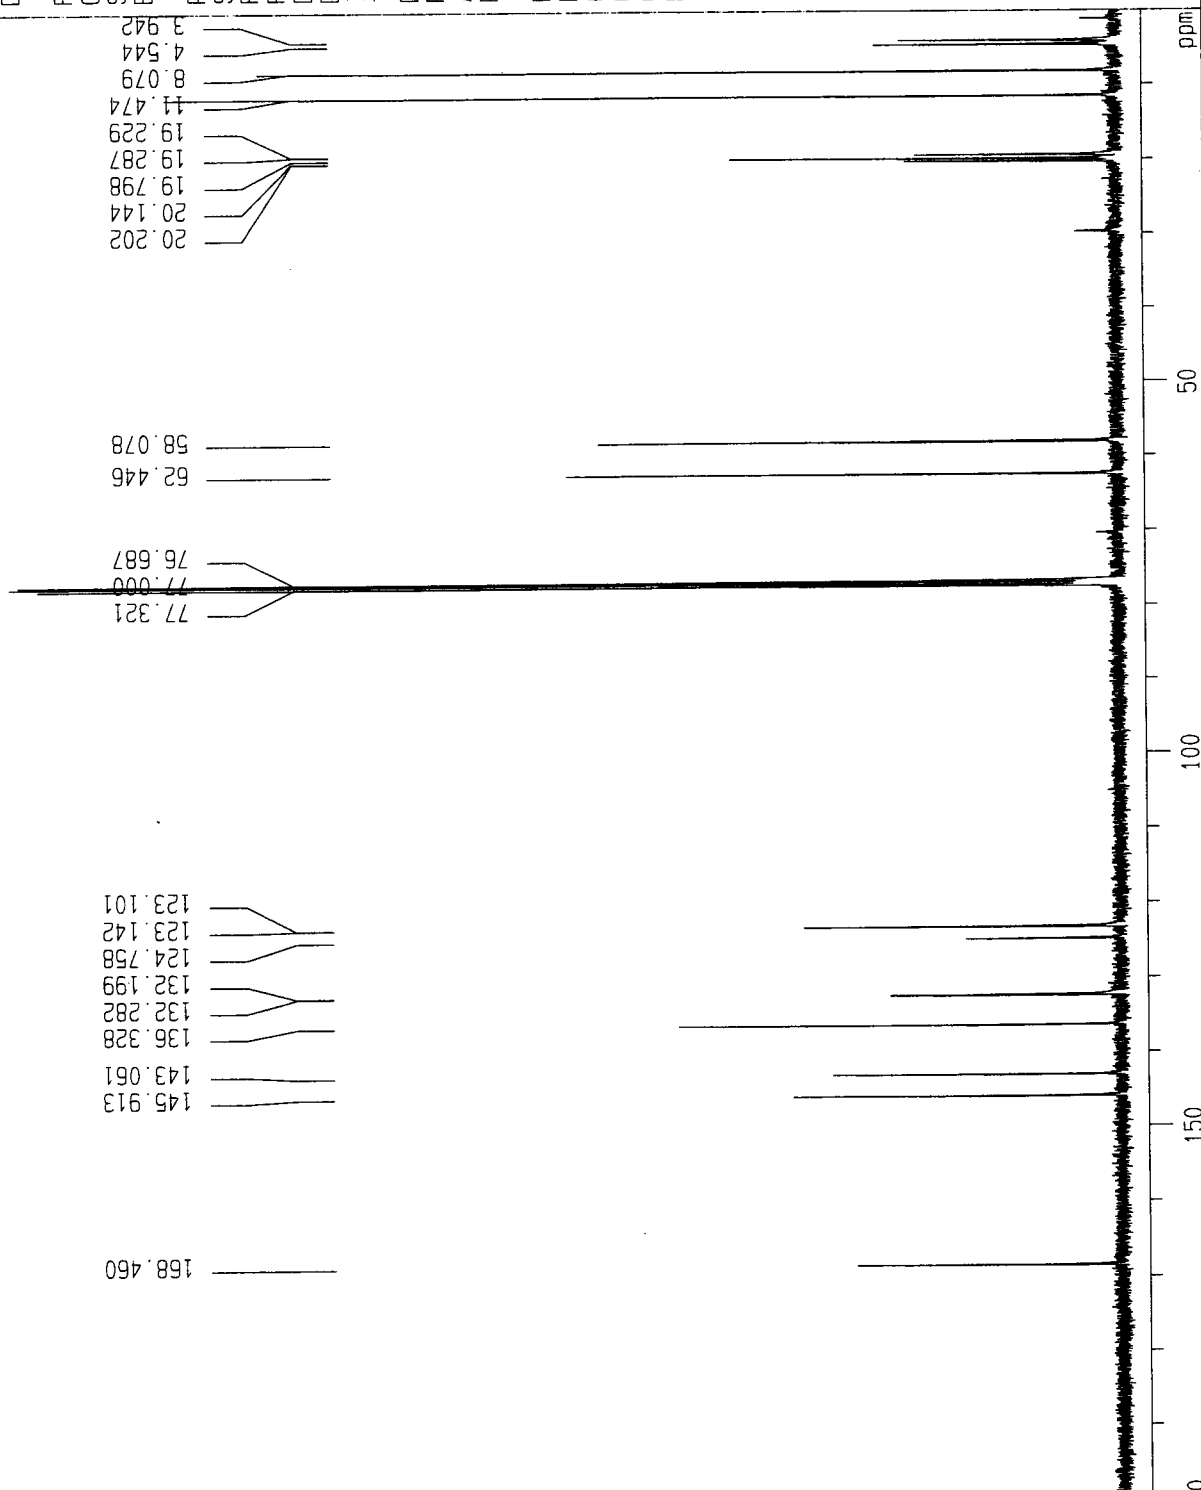

1H Line 07815-15-540-2

Date : Sat Sep 15 12:02:52 2007

File Name : .LoadingFID.nmdata  
 Comment : 1H Line  
 Slice History :  
 EXMODE : non

POINT : 32768 points  
 SAMPO : 32768 points  
 FREQU : 7917.7 Hz  
 FILTR : 3950 Hz  
 DELAY : 50.6 usec  
 DEADT : 73.4 usec  
 INTVL : 126.3 usec  
 TIMES : 16 times  
 DUMMY : 1 times  
 PD : 2.8614 sec  
 ACQTM : 4138.5986 msec  
 PREDL : 0.01000 msec  
 INIWT : 1000.0000 msec  
 RESOL : 0.24 Hz  
 PW1 : 5.05 usec  
 1H :  
 OBNUC : 395.75 MHz  
 OBFRQ : 134498.00 Hz  
 OBSET :  
 RGAIN : 22  
 SCANS : 16 times  
 SLVNT : CDCL3  
 SPINNT : 17 Hz  
 TEMP : 20.5 C

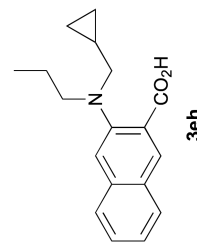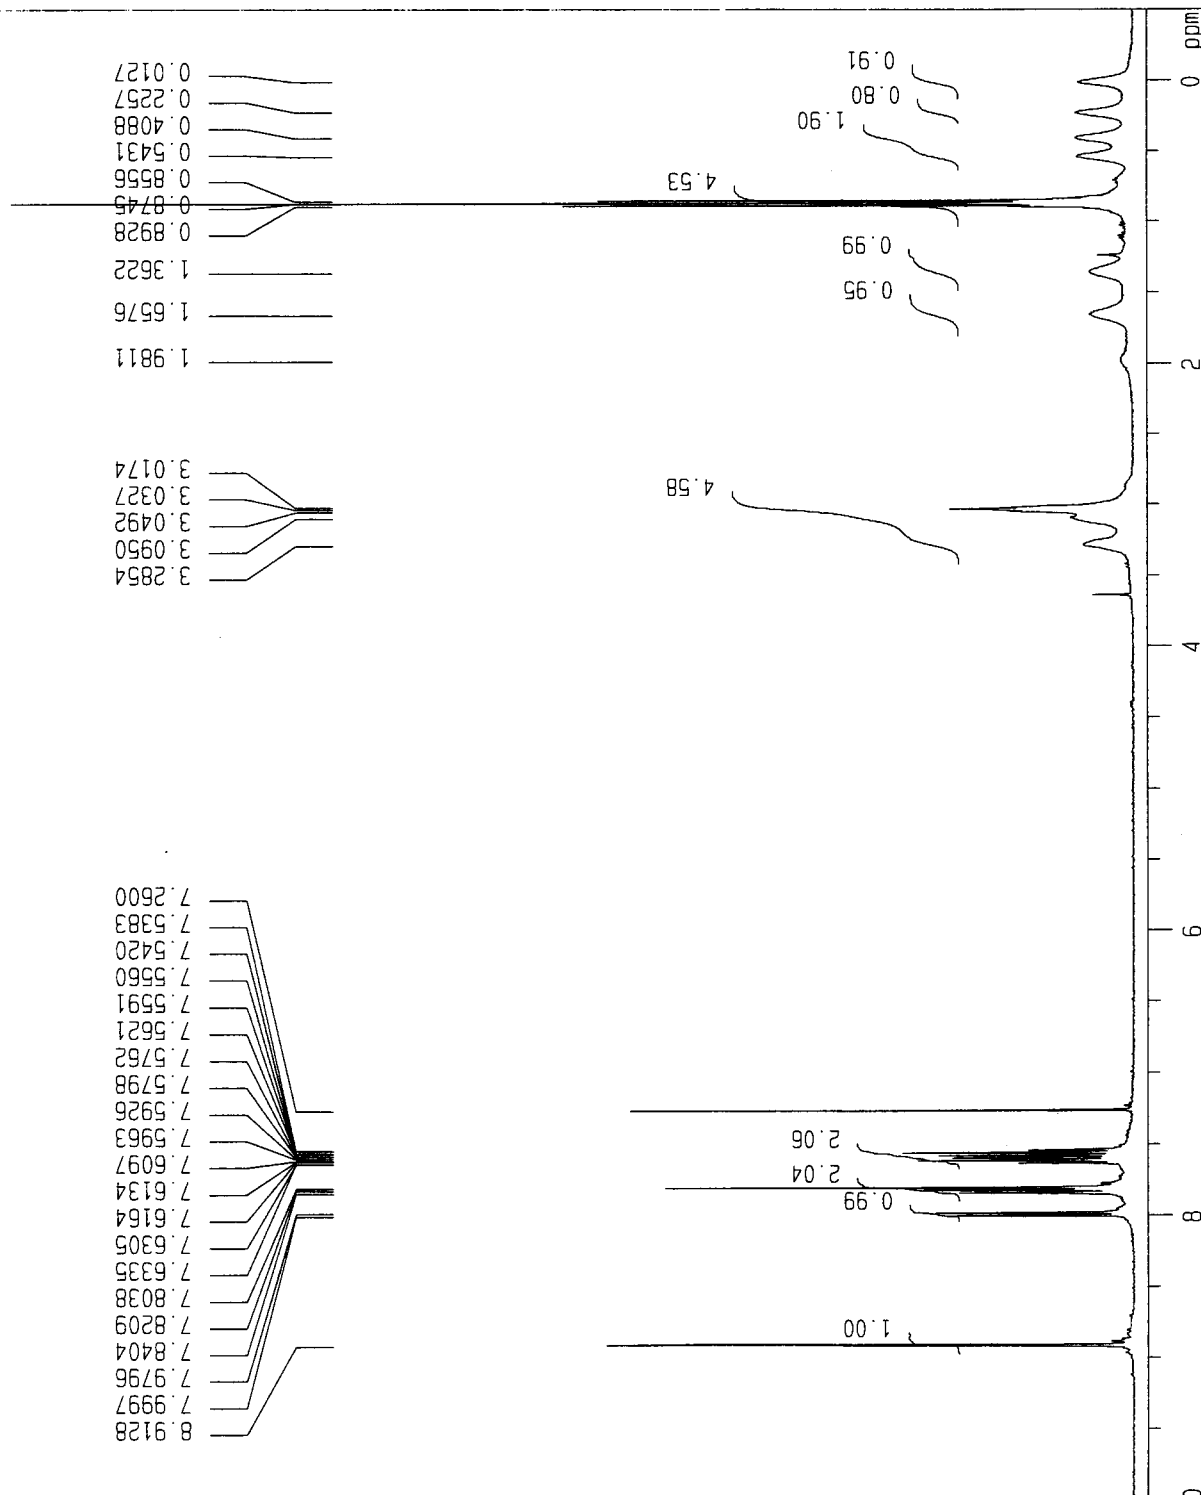

1H Line 070918-15-540-2-13C

Date : Sat Sep 15 21:53:47 2007

File Name : .LoadingFID.nmdata  
 Comment : 1H Line  
 SliceHistory :  
 EXMODE : bcm

POINT 32768 points  
 SAMPO 32768 points  
 FREQU 26881.7 Hz  
 FILTR 13450 Hz  
 DELAY 14.9 usec  
 DEAT 19.1 usec  
 INTVL 37.2 usec  
 TIMES 20000 times  
 DUMMY 4 times  
 PD 1.7810 sec  
 ACQTM 1218.9696 msec  
 PREDL 0.01000 msec  
 INIWT 1000.0000 msec  
 RESOL 0.82 Hz  
 PW1 6.50 usec  
 OBNUC 13C  
 OBFRQ 99.45 MHz  
 OBSET 104750.00 Hz  
 RGAIN 28  
 IRNUC 1H  
 IRFRQ 395.75 MHz  
 IRSET 134498.00 Hz  
 IRRPW 45.0 usec  
 IRRNS 0

SCANS : 11755 times  
 SLVNT : CDCL3  
 SPINNING 20 Hz  
 TEMP 20.8 C

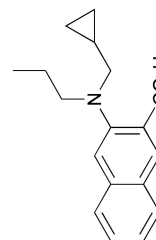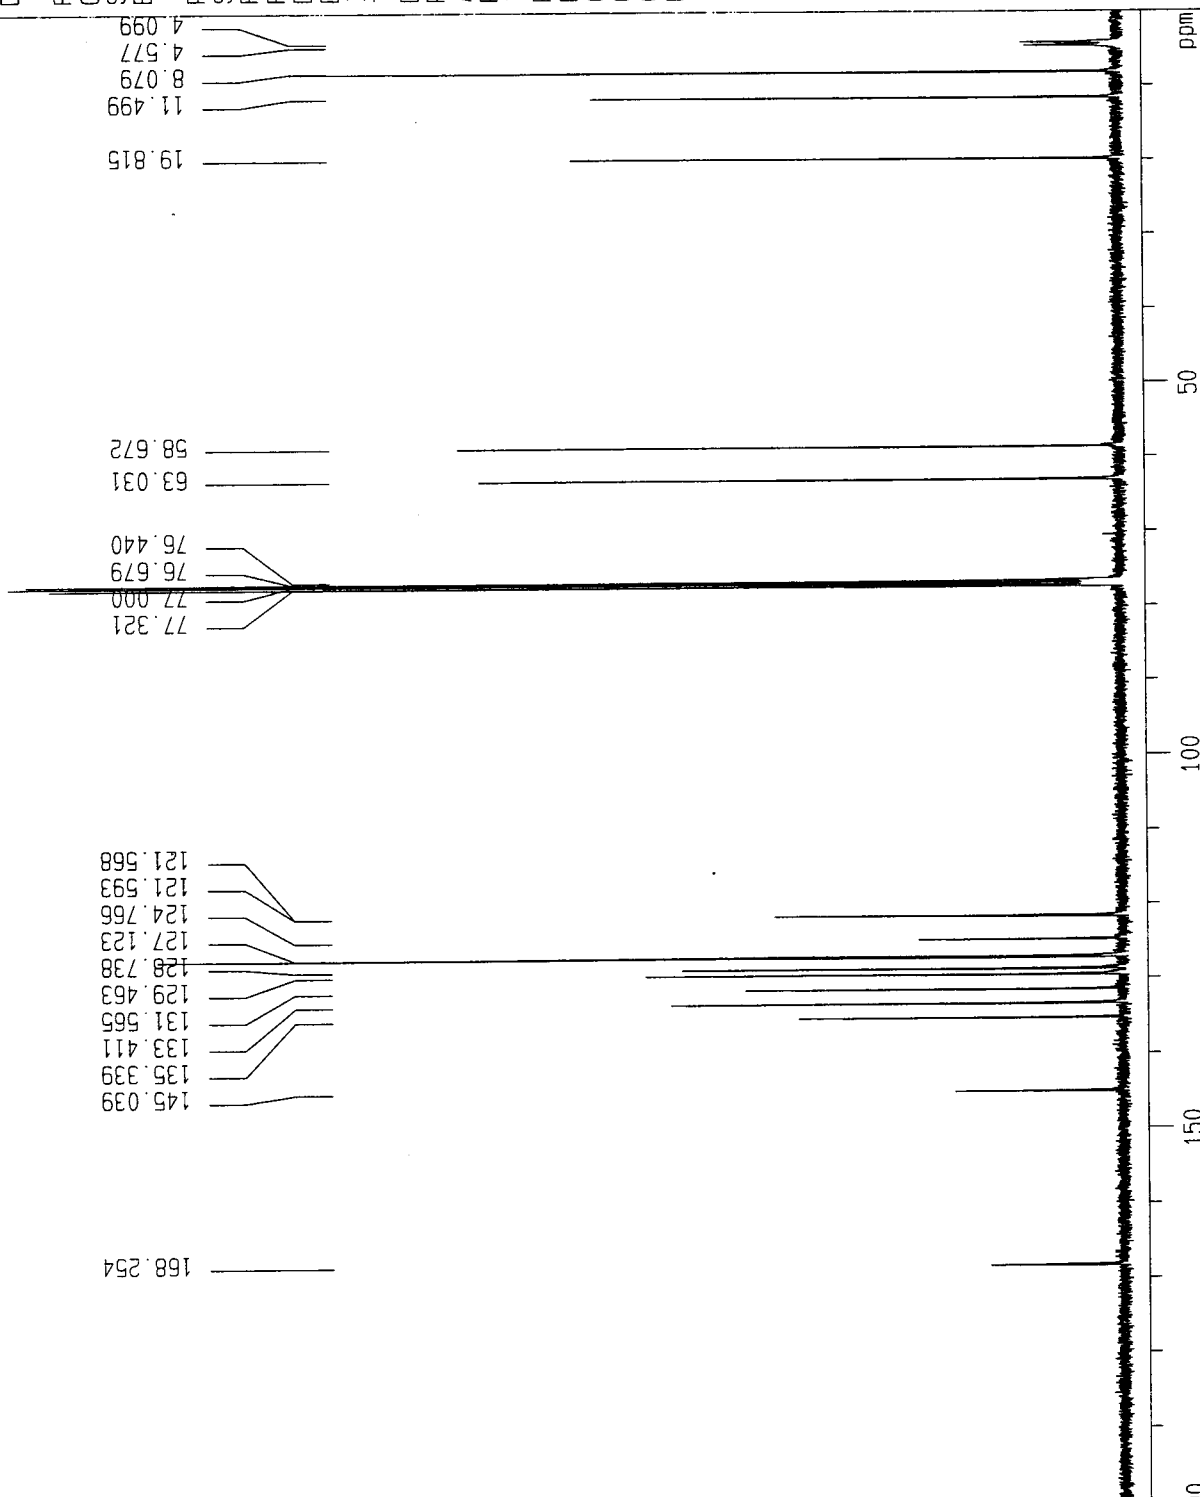

1H Line 070920-15-545-1

Date : Sun Sep 16 22:21:02 2007

File Name : LoadingFID.nmdata  
 Comment : 1H Line  
 Slice History :  
 EXMODE : non

POINT : 32768 points  
 SAMPO : 32768 points  
 FREQU : 7917.7 Hz  
 FILTR : 3950 Hz  
 DELAY : 50.6 usec  
 DEADT : 73.4 usec  
 INTVL : 126.3 usec  
 TIMES : 16 times  
 DUMMY : 1 times  
 PD : 2.8614 sec  
 ACQTM : 4138.5986 msec  
 PREDL : 0.01000 msec  
 INIWT : 1000.0000 msec  
 RESOL : 0.24 Hz  
 PW1 : 5.05 usec  
 OBNUC : 1H  
 OBFRQ : 395.75 MHz  
 OBSET : 134498.00 Hz  
 RGAIN : 18  
 SCANS : 16 times  
 SLVNT : CDCL3  
 SPINNING : 18 Hz  
 TEMP : 20.3 C

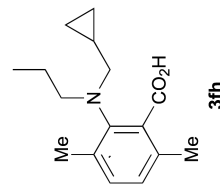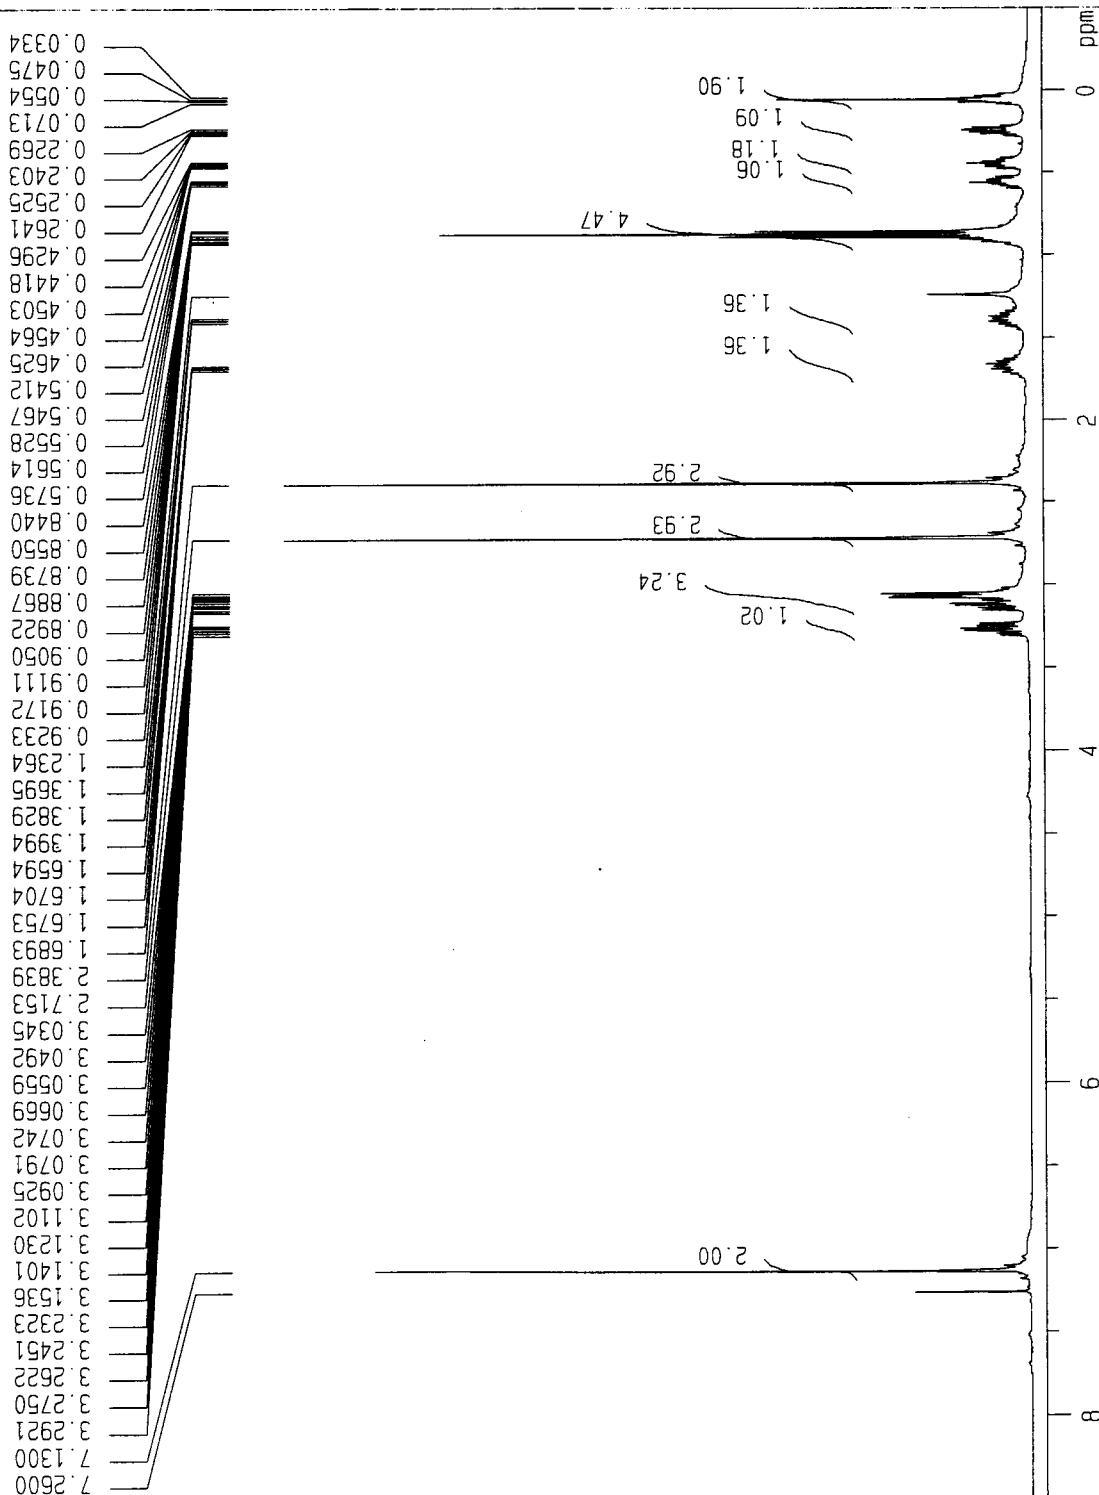

1H Line

070920-15-545-1-13C

Date : Mon Sep 17 21:57:08 2007

FileName : .LoadingFID nmdata

Comment : 1H Line

SliceHistory :

EXMODE :

bcm

POINT 32768 points  
 SAMPD 32768 points  
 FREQD 26881.7 Hz  
 FIDIR 13450 Hz  
 DELAY 14.9 usec  
 DEACT 19.1 usec  
 INTVL 37.2 usec  
 TIMES 20000 times  
 DUMX 4 times  
 PD 1.7810 sec  
 ACQTM 1218.9696 msec  
 PREDL 0.01000 msec  
 ININT 1000 0000 msec  
 RESOL 0.82 Hz  
 PW1 6.50 usec  
 13C 13C  
 OBNUC 99.45 MHz  
 OBFRQ 104750.00 Hz  
 OBSET 28  
 RGAIN 1H  
 IRNUC 395.75 MHz  
 IRFRQ 134498.00 Hz  
 IRSET 45.0 usec  
 IRPRW 0  
 IRANS 0  
 SCANS 12438 times  
 SLVNT CDCL3  
 SPINNT 18 Hz  
 SPINNT 21.8 C  
 TEMP

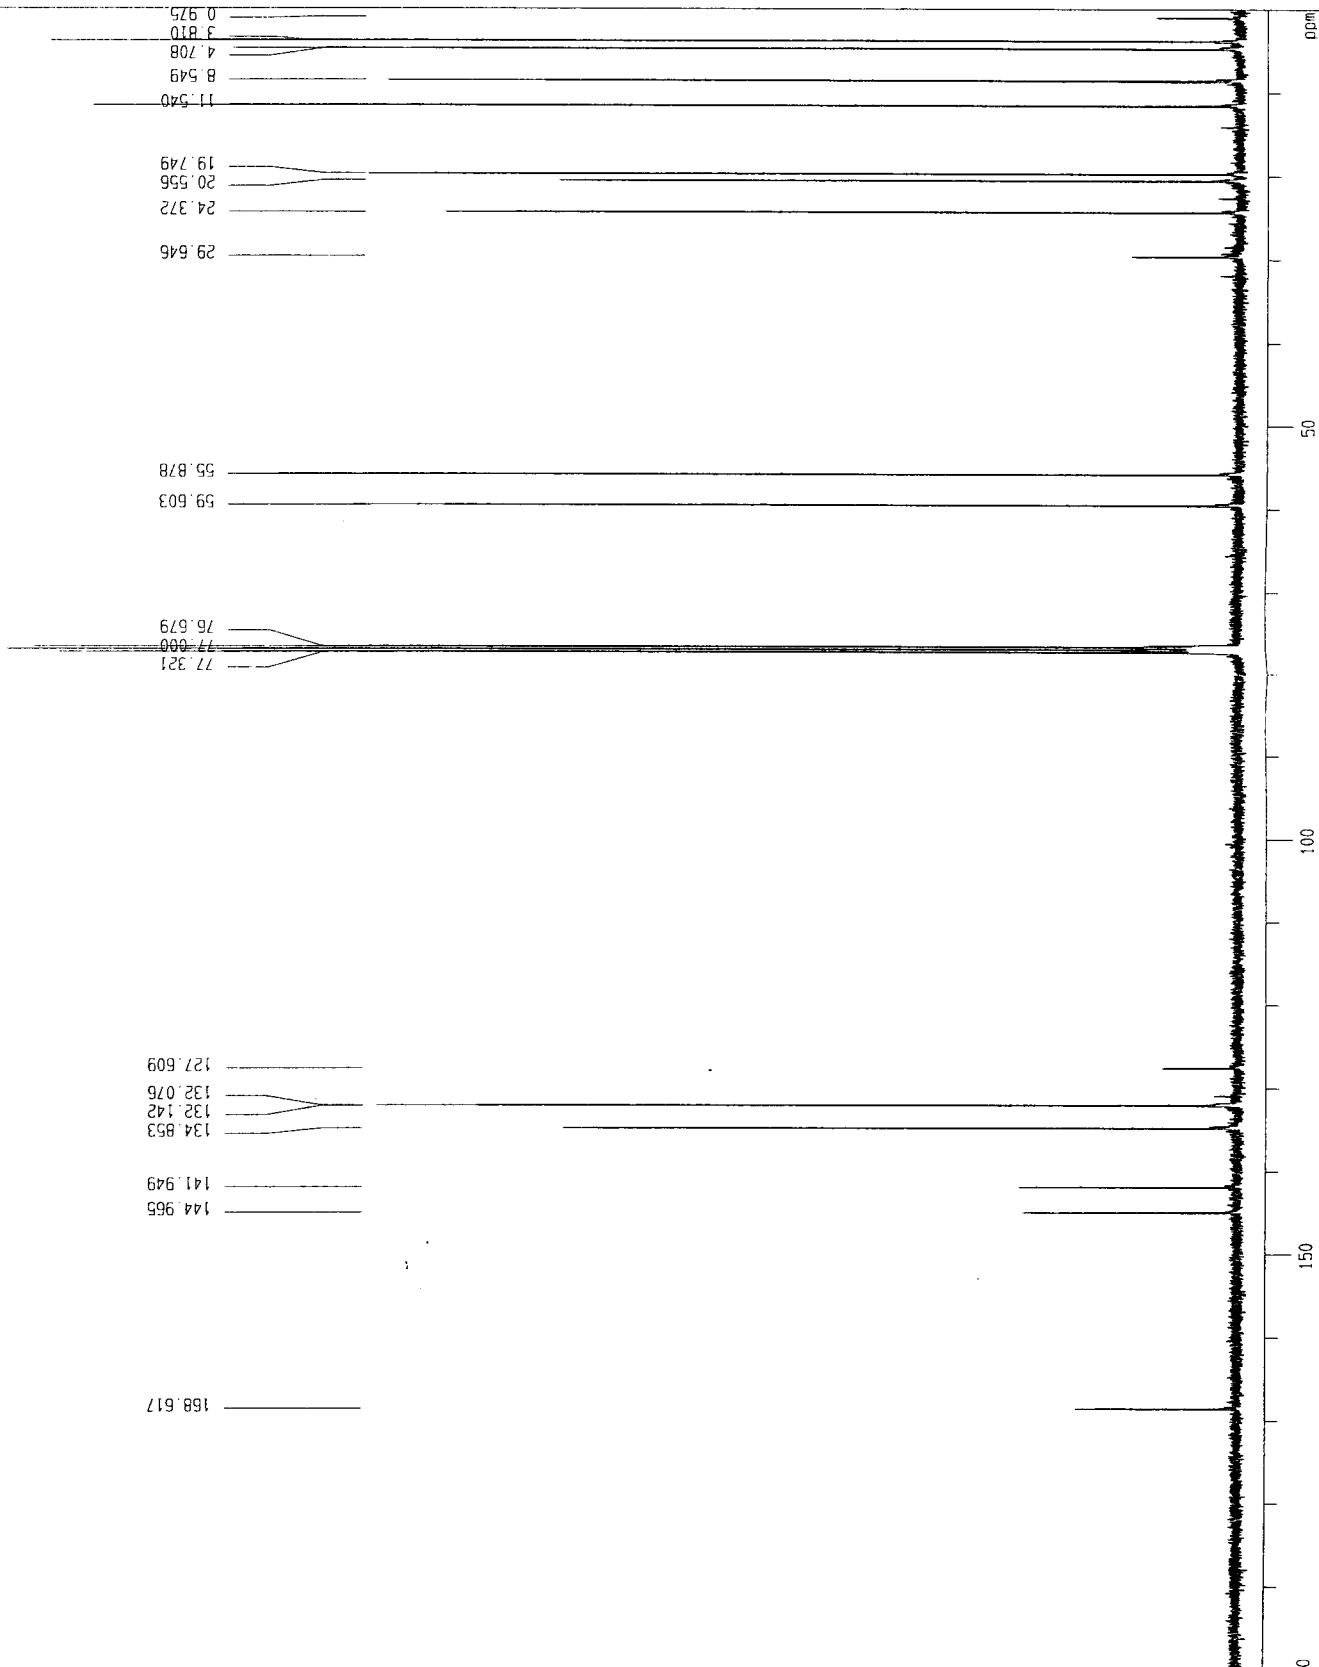

1H Line 09/002-15-550-12

Date : Fri Sep 28 22:38:50 2007

FileName : .LoadingFID.nmdata  
 Comment : 1H Line  
 SliceHistory :  
 EXMODE : non

POINT 32768 points  
 SAMPO 32768 points  
 FREQU 7917.7 Hz  
 FILTR 3950 Hz  
 DELAY 50.6 usec  
 DEAT 73.4 usec  
 INTVL 126.3 usec  
 TIMES 16 times  
 DUMMY 1 times  
 PD 2.8614 sec  
 ACQTM 4138.5986 msec  
 PREDL 0.01000 msec  
 INIWT 1000.0000 msec  
 RESOL 0.24 Hz  
 PW1 5.05 usec  
 OBNUC 1H  
 OBFRQ 395.75 MHz  
 OBSET 134498.00 Hz  
 RGAIN 22

SCANS : 16 times  
 SLVNT : CDCL3  
 SPINNING : 13 Hz  
 TEMP : 19.9 C

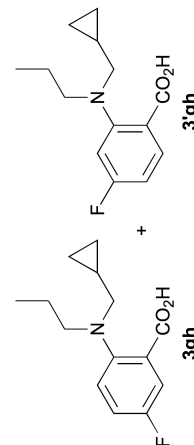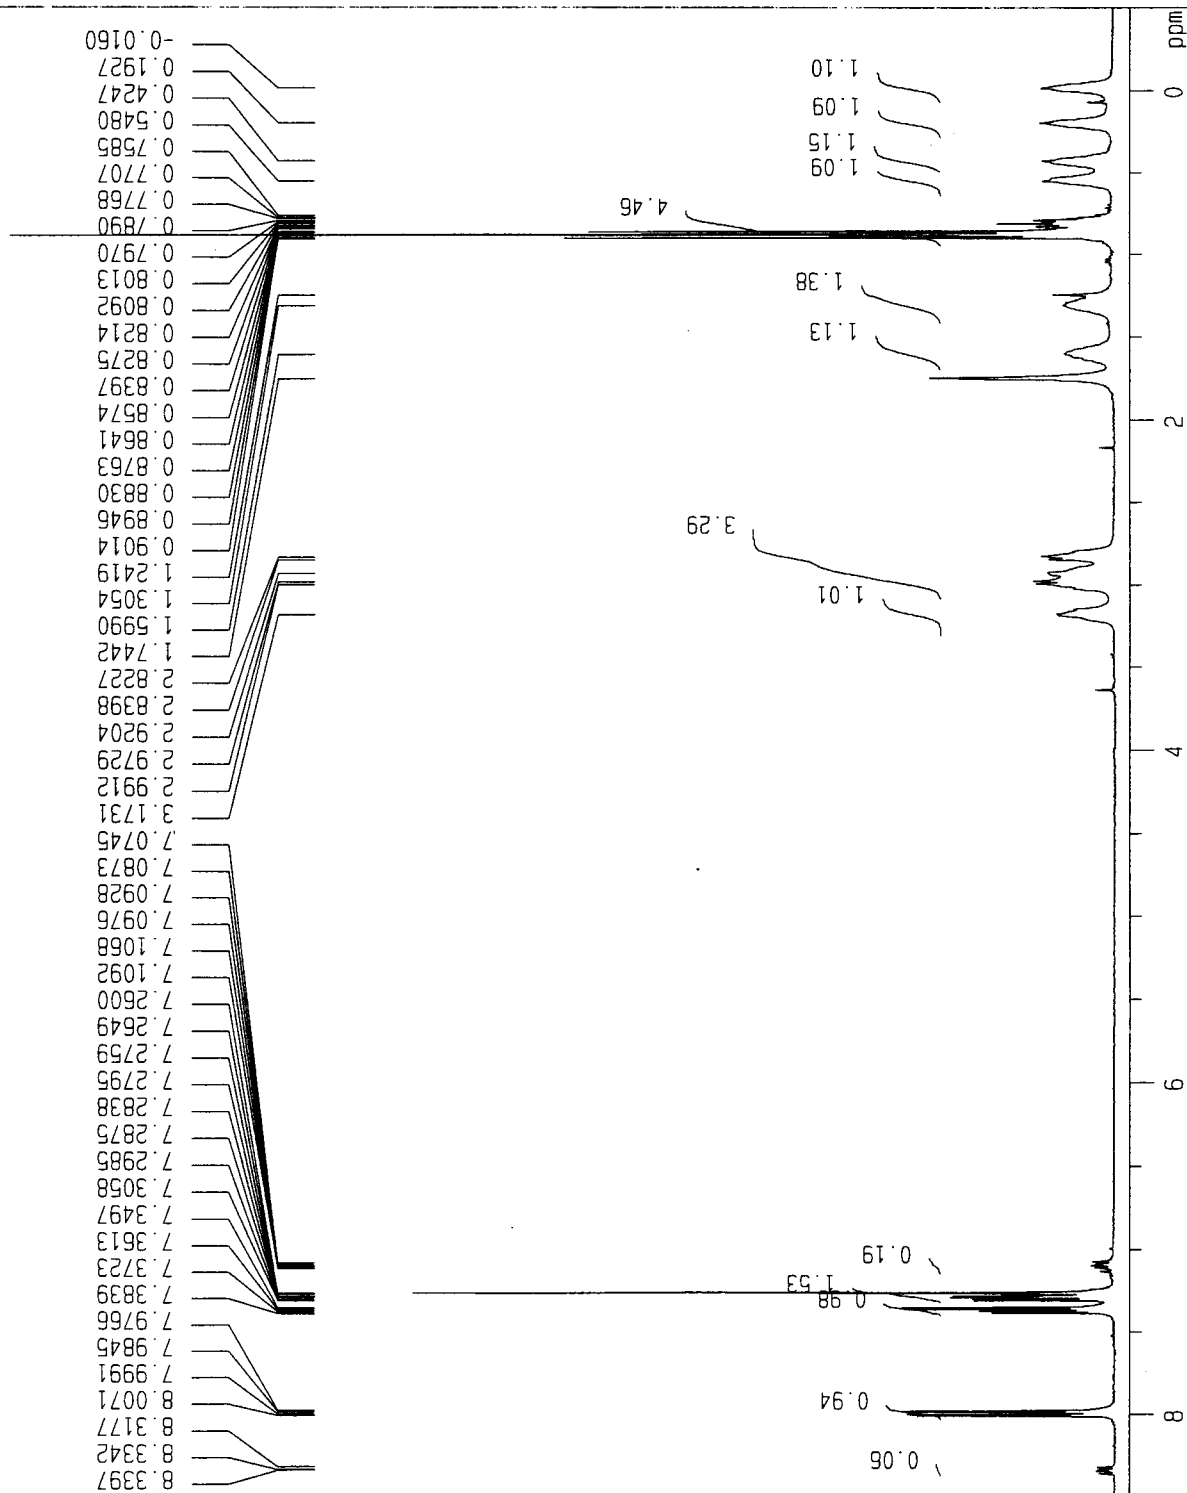



071003-15-551-2-13C

1H Line

Date : Mon Feb 12 01:43:45 2007

FileName : LoadingFID.nmdata  
 Comment : 1H Line  
 SliceHistory :  
 EXMODE : bcm

POINT 32768 points  
 SAMPO 32768 points  
 FREQU 26881.7 Hz  
 FILTR 13450 Hz  
 DELAY 14.9 usec  
 DEADT 19.1 usec  
 INTVL 37.2 usec  
 TIMES 20000 times  
 DUMMY 4 times  
 PD 1.7810 sec  
 ACQTM 1218.9696 msec  
 PREDL 0.01000 msec  
 INIWT 1000.0000 msec  
 RESOL 0.82 Hz  
 PW1 6.50 usec  
 13C  
 OBNUC 99.45 MHz  
 OBFRQ 104750.00 Hz  
 OBSET 28  
 RGAIN 1H  
 IRNUC 395.75 MHz  
 IRFRQ 134498.00 Hz  
 IRSET 45.0 usec  
 IRRPW 0  
 IRRNS

SCANS : 10533 times

SLVNT : CDCL3  
 SPINNING 19 Hz  
 TEMP 21.3 C

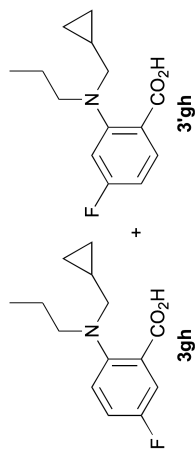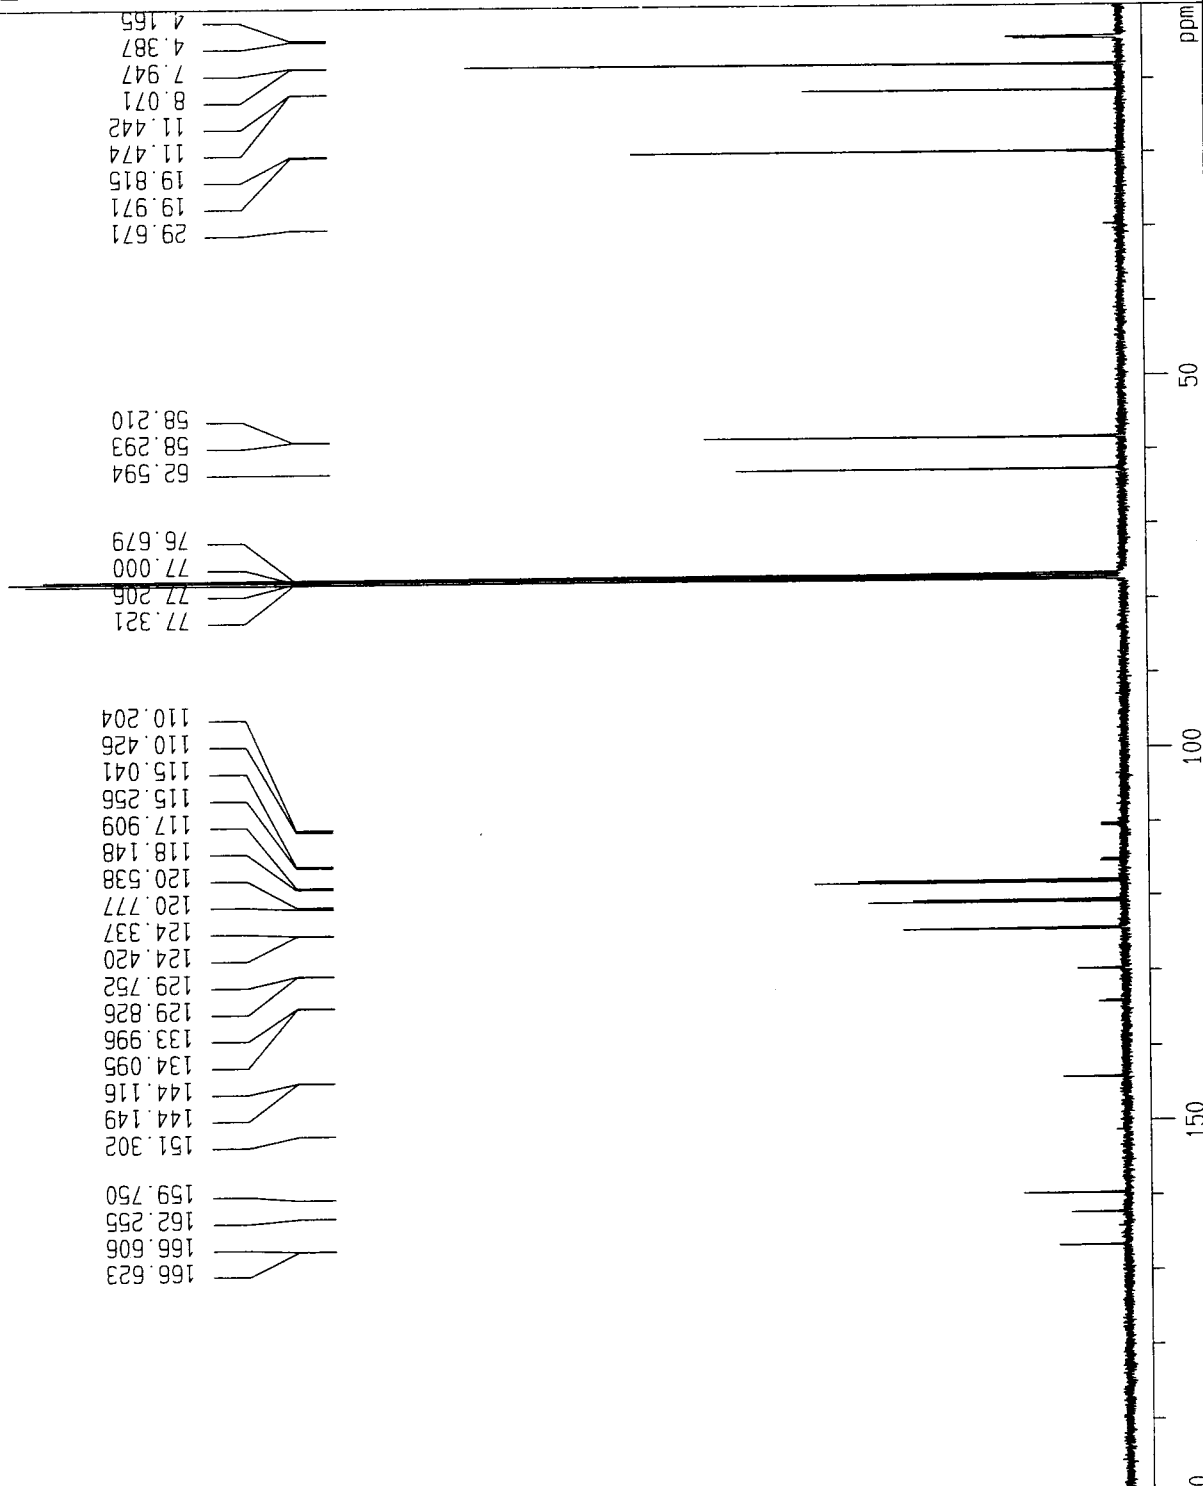

1H Line 071002-15-555-1

Date : Fri Sep 28 22:30:47 2007

FileName : .LoadingFID.nmdata  
 Comment : 1H Line  
 SliceHistory :  
 EXMODE : non

POINT : 32768 points  
 SAMPO : 32768 points  
 FREQU : 7917.7 Hz  
 FILTR : 3950 Hz  
 DELAY : 50.6 usec  
 DEAT : 73.4 usec  
 INTVL : 126.3 usec  
 TIMES : 16 times  
 DUMMY : 1 times  
 PD : 2.8614 sec  
 ACQTM : 4138.5986 msec  
 PREDL : 0.01000 msec  
 INIWT : 1000.0000 msec  
 RESOL : 0.24 Hz  
 PW1 : 5.05 usec  
 OBNUC : 1H  
 OBFRQ : 395.75 MHz  
 OBSET : 134498.00 Hz  
 RGAIN : 19  
 SCANS : 16 times  
 SLVNT : CDCL3  
 SPINNT : 14 Hz  
 TEMP : 19.9 C

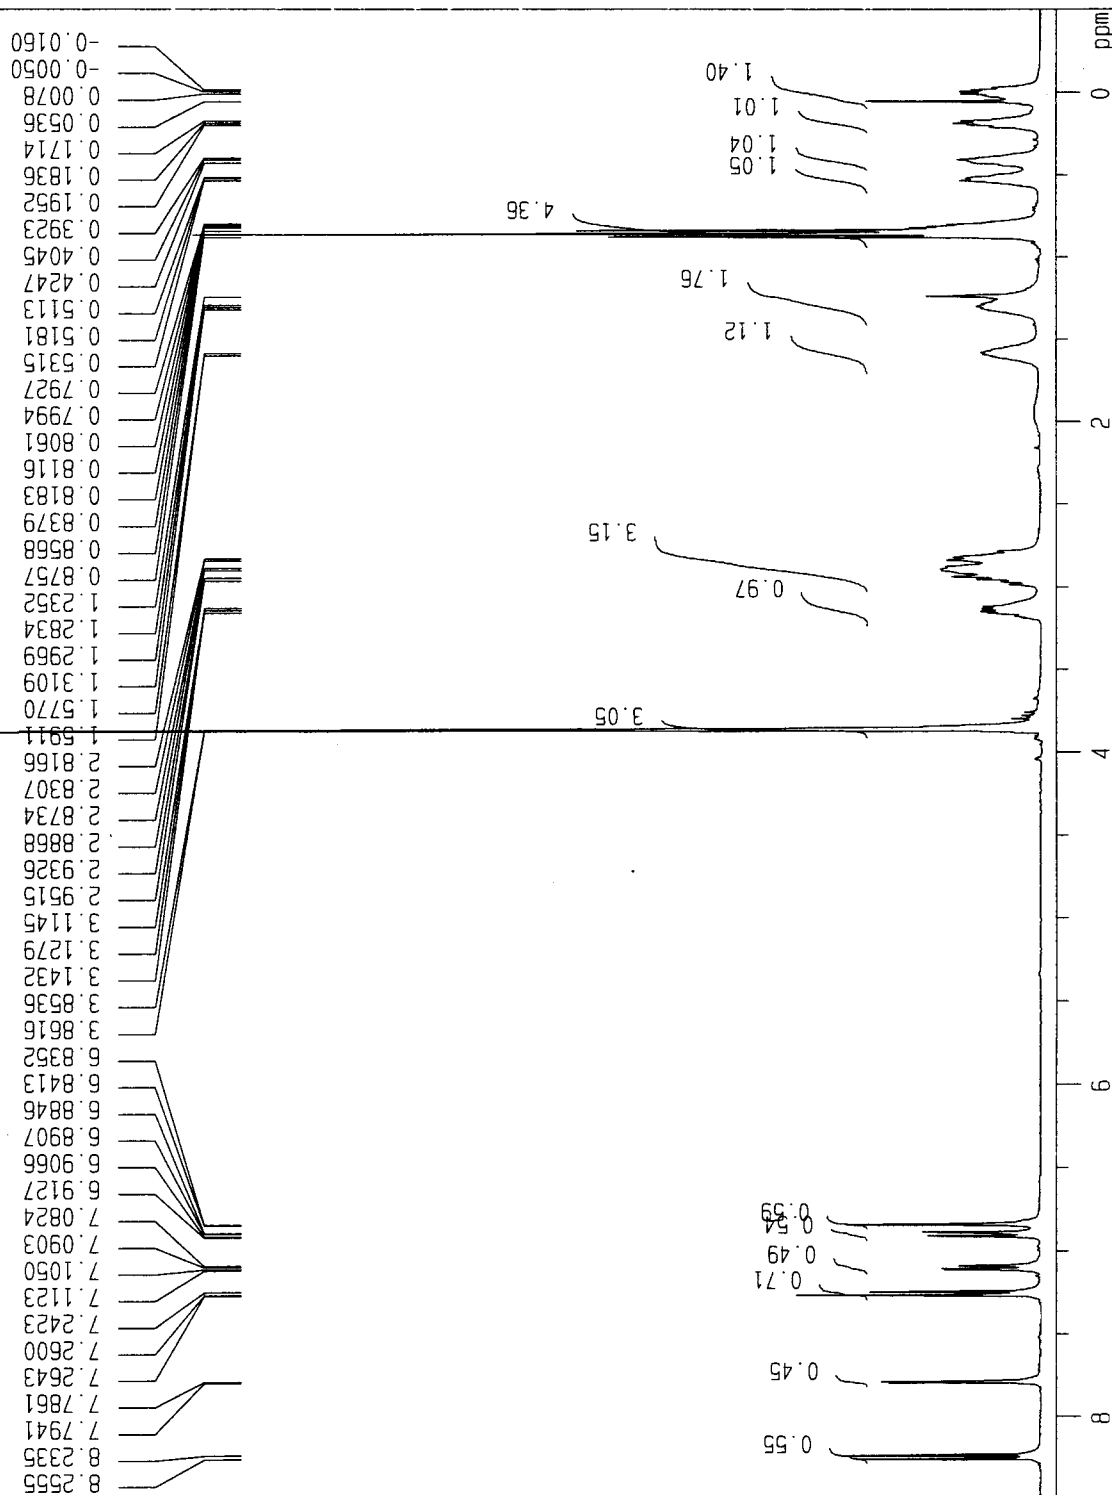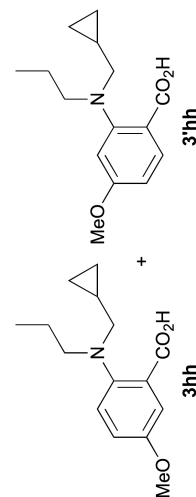

\_DEFAULT.ALS

DRILE  
COMNT  
DATIM  
OBNUC  
EXMOD  
OBFRQ  
OBSET  
OBFIN  
POINT  
FREQU  
SCANS  
ACQTM  
PD  
PWI  
IRNUC  
CTEMP  
SLVNT  
EXREF  
BF  
RGAIN

Thu Oct 04 08:48:16 2007  
13C  
BCM  
67.80 MHz  
135.00 KHz  
5200.00 Hz  
32768  
18306.64 Hz  
11332  
1.7900 sec  
1.2100 sec  
3.50 usec  
1H  
22.8 c  
CDCL3  
77.00 ppm  
0.12 Hz  
27

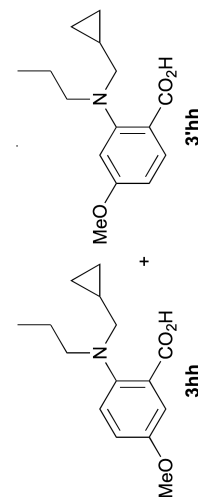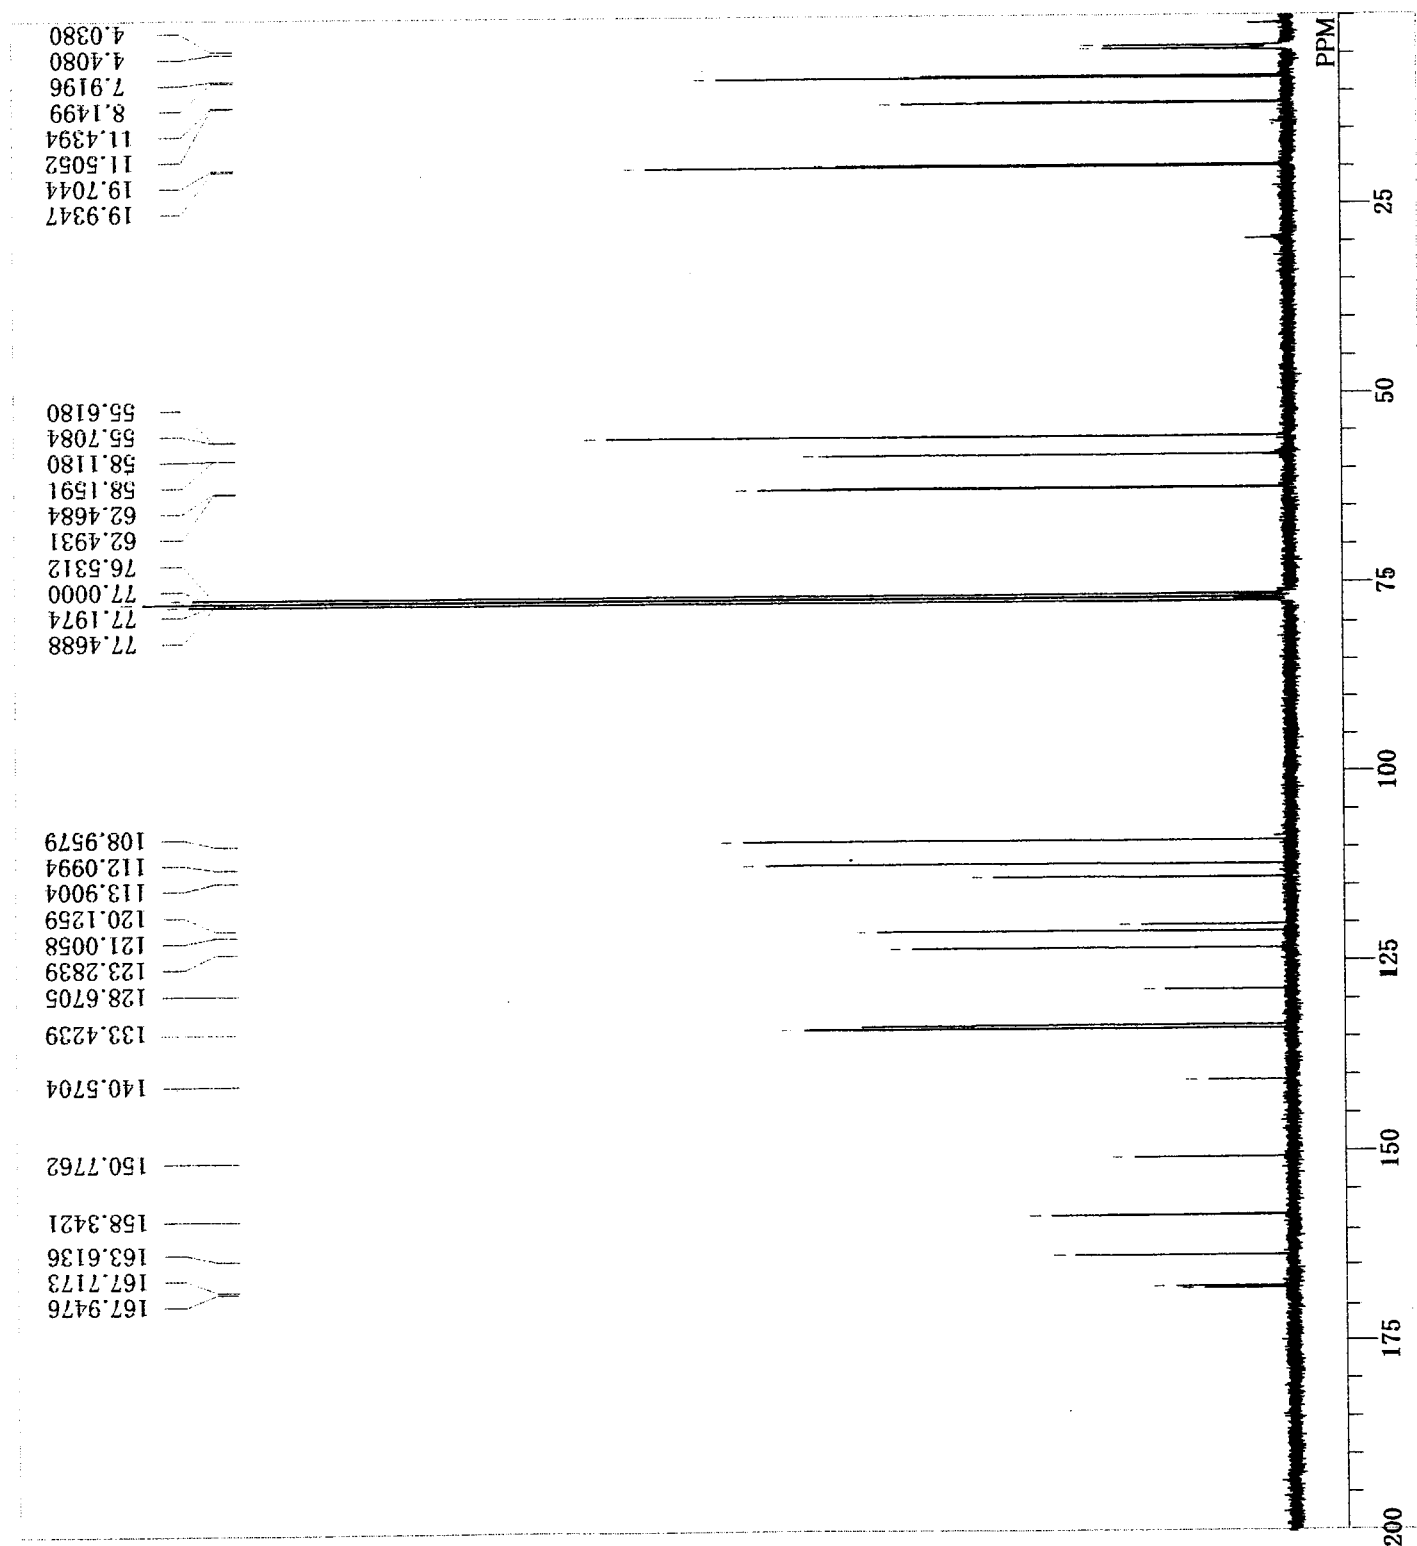

071005-15-548-2

```

File Name      : .LoadingFID.nmdata
Comment       : 1H Line
Slice History  :
EXMODE        : non

```

|          |   |           |        |
|----------|---|-----------|--------|
| POINT    | : | 32768     | points |
| SAMPO    | : | 32768     | points |
| FFREQU   | : | 7917.7    | Hz     |
| FILTR    | : | 3950      | Hz     |
| DELAY    | : | 50.6      | usec   |
| DEADT    | : | 73.4      | usec   |
| INTVL    | : | 126.3     | usec   |
| TIMES    | : | 16        | times  |
| DUMMY    | : | 1         | times  |
| PD       | : | 2.8614    | sec    |
| ACQTM    | : | 4138.5986 | msec   |
| PREDL    | : | 0.01000   | msec   |
| INTWT    | : | 1000.0000 | msec   |
| RESOL    | : | 0.24      | Hz     |
| PW1      | : | 5.05      | usec   |
| OBNUC    | : | 1H        |        |
| OBFREQ   | : | 395.75    | MHz    |
| OBSET    | : | 134498.00 | Hz     |
| RGAIN    | : | 20        |        |
| SCANS    | : | 16        | times  |
| SLVNT    | : | CDCL3     |        |
| SPINNING | : |           |        |
| TEMP     | : | 15        | Hz     |
|          | : | 20.9      | C      |

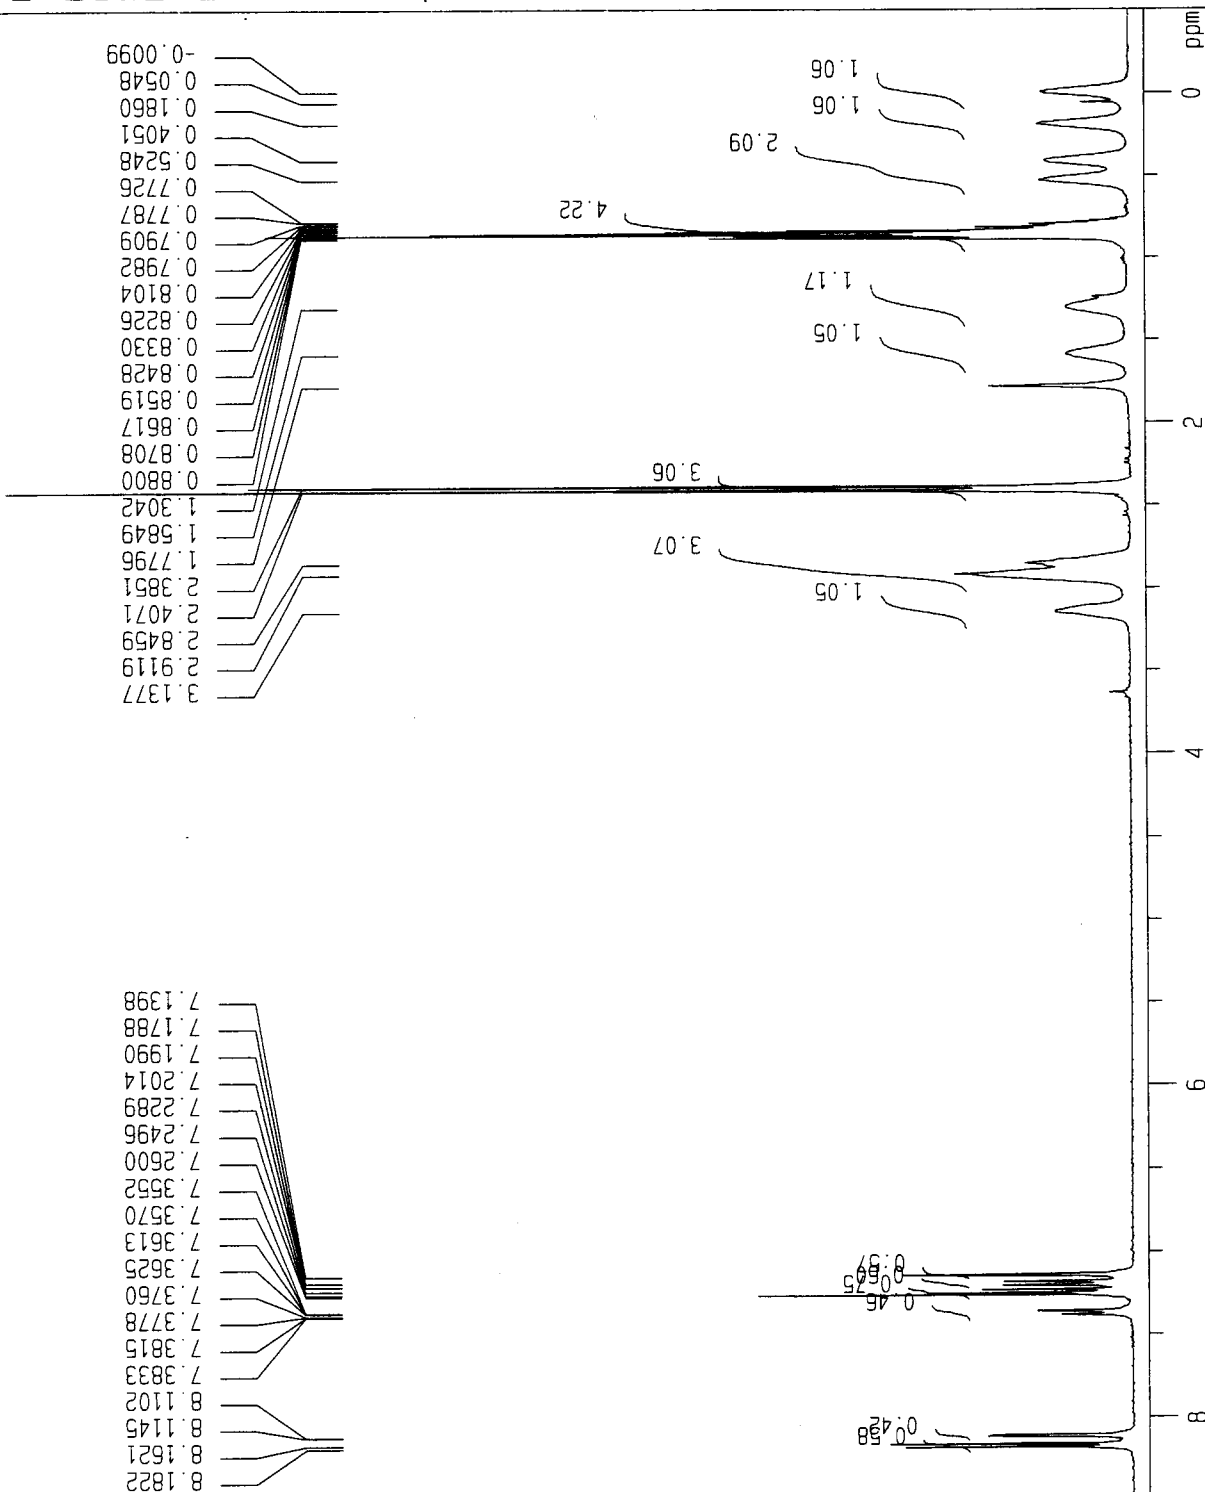

1H Line 07005-15-548 - 2-13C

Date : Mon Feb 12 01:43:45 2007

File Name : LoadingFID.nmdata  
Comment : 1H Line  
Slice History :  
EXMODE : bcm

POINT 32768 points  
SAMPD 32768 points  
FREQU 26881.7 Hz  
FILTR 13450 Hz  
DELAY 14.9 usec  
DEADT 19.1 usec  
INTVL 37.2 usec  
TIMES 20000 times  
DUMMY 4 times  
PD 1.7810 sec  
ACQTM 1218.9696 msec  
PREDL 0.01000 msec  
INIWT 1000.0000 msec  
RESOL 0.82 Hz  
PW1 6.50 usec  
13C 13C  
OBNUC 99.45 MHz  
OBFRQ 104750.00 Hz  
OBSET 28  
RGAIN 1H  
IRNUC 395.75 MHz  
IRFRQ 134498.00 Hz  
IRSET 45.0 usec  
IRRPW 0  
IRNS 0

SCANS : 12301 times  
SLVNT : CDCL3  
SPINNING 15 Hz  
TEMP 21.6 C

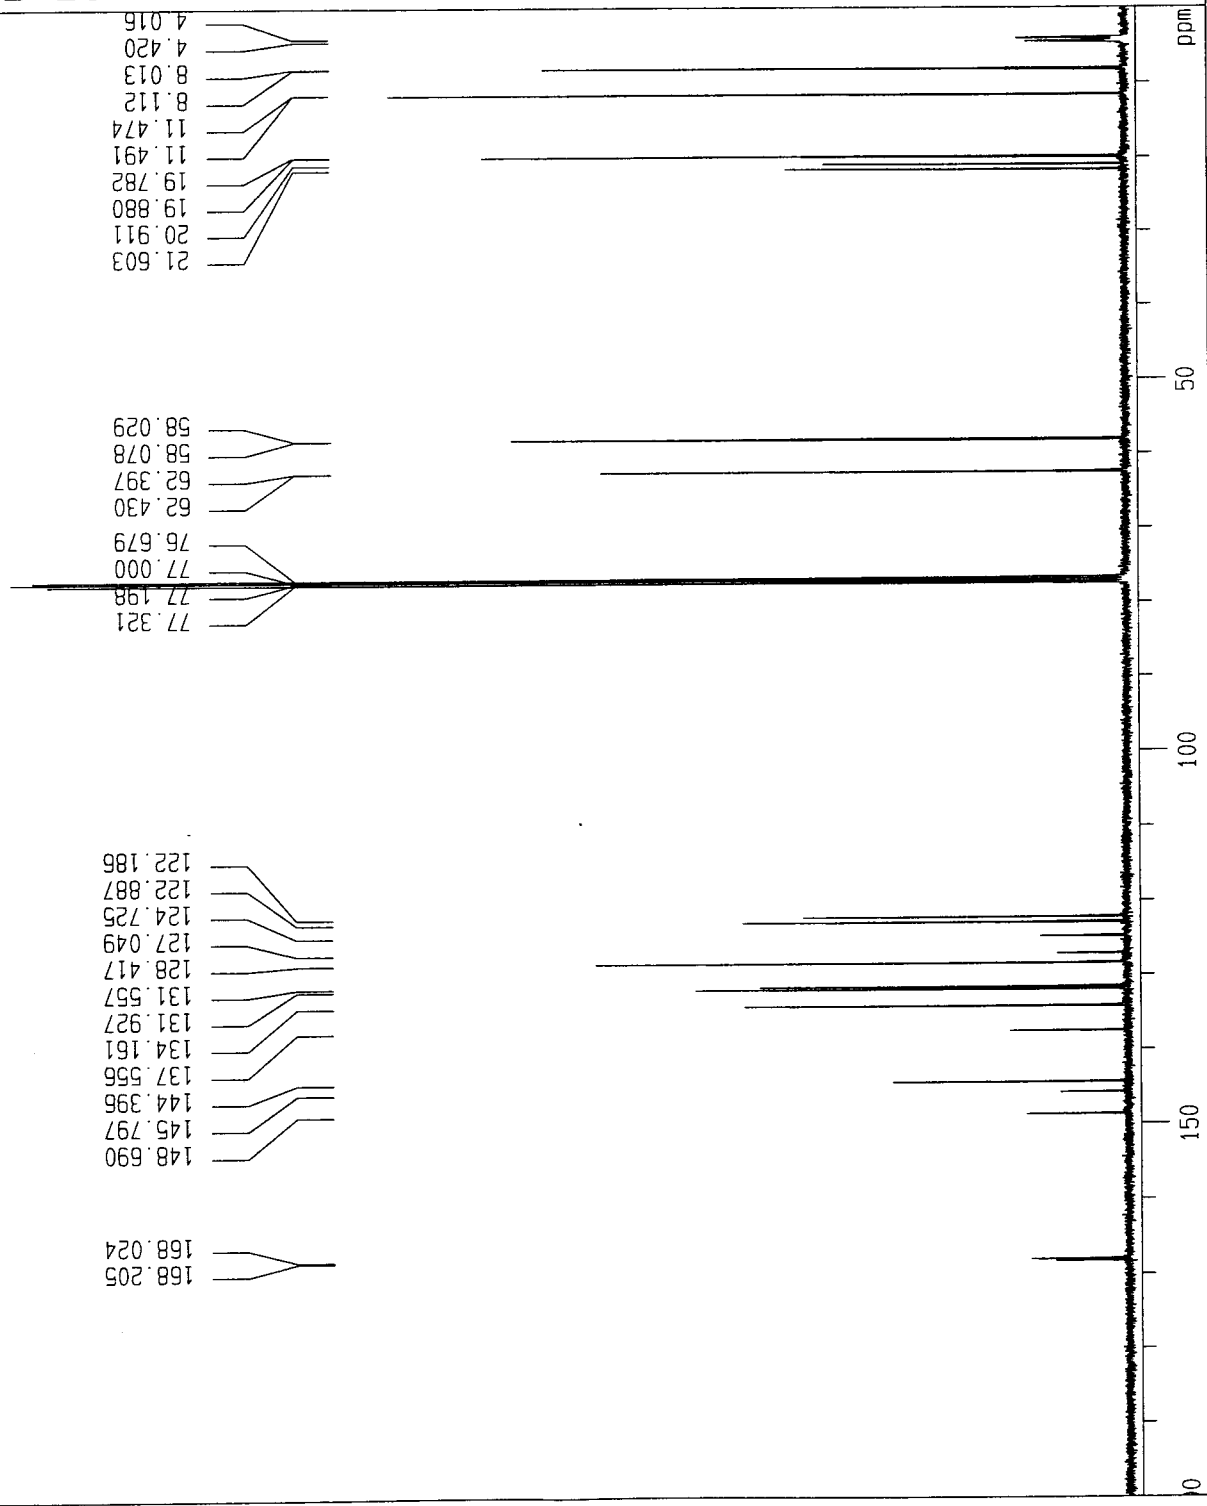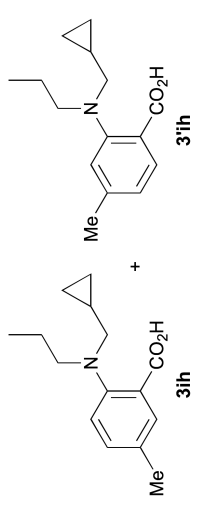

Supplement: Supplementary file 1 [file 4615039]
